# Supplementary material for: A 10-year follow-up study of sex inclusion in the biological sciences
Source: eLife. 2020 Jun 9;9:e56344. doi: 10.7554/eLife.56344 (PMC7282816; doi:10.7554/eLife.56344)
Supplement: Supplementary file 1. — This file contains the data represented in Figures 1 and 2, as well as p-values for all the statistical tests shown in Figures 1 and 2. [file elife-56344-supp1.xlsx]

## Sheet: 2019 Data Summary
	2019													2009
Discipline	Males	%Male	Females	%Female	Both	%Both	Sex not specified	%NotSpecified	Analyzed by sex	%Analyzed by sex	M:F Ratio	F:M Ratio		Males	%Male	Females	%Female	Both	%Both	Sex not specified	%Notspecified	Analyzed by sex	%Analyzed by sex	M:F Ratio
General Biology	15	0.1875	10	0.125	47	0.5875	8	0.1	10	0.212766	1.5	0.666667		14	0.175	5	0.0625	27	0.3375	34	0.425	10	0.37037	2.8
Immunology	10	0.125	12	0.15	37	0.4625	21	0.2625	10	0.27027	0.833333	1.2		6	0.075	13	0.1625	13	0.1625	49	0.6125	3	0.230769	0.461538
Neuroscience	22	0.275	3	0.0375	50	0.625	5	0.0625	9	0.18	7.33333	0.136364		33	0.4125	6	0.075	23	0.2875	18	0.225	5	0.217391	5.5
Physiology	41	0.5125	3	0.0375	29	0.3625	7	0.0875	12	0.413793	13.6667	0.0731707		41	0.5125	11	0.1375	10	0.125	18	0.225	3	0.3	3.72727
Pharmacology	46	0.575	8	0.1	23	0.2875	3	0.0375	11	0.478261	5.75	0.173913		40	0.5	8	0.1	26	0.325	6	0.075	5	0.192308	5
Endocrinology	18	0.225	17	0.2125	45	0.5625	0	0	27	0.6	1.05882	0.944444		37	0.4625	17	0.2125	24	0.3	2	0.025	14	0.583333	2.17647
Reproduction	15	0.1875	54	0.675	11	0.1375	0	0	9	0.818182	0.277778	3.6		70	0.35	110	0.55	19	0.095	1	0.005	19	1	0.636364	Note: In original Beery and Zucker report, they sampled 100 articles each from Reproduction and Biol Reproduction for a total of 200 articles
Behavioral Physiology	19	0.2375	11	0.1375	49	0.6125	1	0.0125	22	0.44898	1.72727	0.578947		27	0.3375	18	0.225	34	0.425	1	0.0125	16	0.470588	1.5
Behavior	5	0.0625	9	0.1125	65	0.8125	1	0.0125	41	0.630769	0.555556	1.8		11	0.1375	8	0.1	56	0.7	5	0.0625	42	0.75	1.375
TOTAL	191	0.265278	127	0.176389	356	0.494444	46	0.0638889	151	0.424157	1.50394	0.664921		279	0.331748	196	0.233056	232	0.275862	134	0.159334	117	0.50431	1.42347
	2009 vs. 2019 Both Sexes vs Single and Unspecified					2009 vs 2019 Sex-Based Analyses				2019	2009			Table Analyzed	Total Both Sexes				Table Analyzed	Total Analyses
Discipline	p value	signifiance				p value	signifiance		Discipline	%Both	%Both	% change
General Biology	p=0.0015	**				0.1417			Neuroscience	0.625	0.2875	0.3375		P value and statistical significance					P value and statistical significance
Immunology	<0.0001	****				0.78			Immunology	0.4625	0.1625	0.3		Test	Chi-square				Test	Chi-square
Neuroscience	<0.0001	****				0.7062			Endocrinology	0.5625	0.3	0.2625		Chi-square, df	49.66, 1				Chi-square, df	3.638, 1
Physiology	p=0.0005	***				0.5236			General Biology	0.5875	0.3375	0.25		z	7.047				z	1.907
Pharmacology	0.6069	ns				0.0332	*		Physiology	0.3625	0.125	0.2375		P value	<0.0001				P value	0.0565
Endocrinology	0.0008	***				0.8932			TOTAL	0.494444	0.275862	0.218582		P value summary	****				P value summary	ns
Reproduction	0.3477	ns				0.0544			Behavioral Physiology	0.6125	0.425	0.1875		One- or two-sided	Two-sided				One- or two-sided	Two-sided
Behavioral Physiology	p=0.0176	*				0.8459			Behavior	0.8125	0.7	0.1125		Statistically significant (P < 0.05)?	Yes				Statistically significant (P < 0.05)?	No
Behavior	0.0975	ns				0.1588			Reproduction	0.1375	0.095	0.0425
All Categories	p<0.0001	****				0.2986			Pharmacology	0.2875	0.325	-0.0375		Data analyzed	Both Sexes	Single Sex or Unspecified	Total		Data analyzed	Analyzed by Sex	Did Not Analyze by Sex	Total
														2009	232	508	740		2009	117	115	232
Discipline	N Provided by Sex	Percent N by Sex	Total Studies to include both sexes											2019	356	364	720		2019	151	205	356
Neuroscience	24	0.48	50											Total	588	872	1460		Total	268	320	588
General Biology	25	0.531915	47
Immunology	21	0.567568	37											Percentage of row total	Both Sexes	Single Sex or Unspecified			Percentage of row total	Analyzed by Sex	Did Not Analyze by Sex
Physiology	19	0.655172	29											2009	31.35%	68.65%			2009	50.43%	49.57%
TOTAL	89.0975	0.733146	163											2019	49.44%	50.56%			2019	42.42%	57.58%
Behavior	53	0.815385	65
Pharmacology	20	0.869565	23											Percentage of column total	Both Sexes	Single Sex or Unspecified			Percentage of column total	Analyzed by Sex	Did Not Analyze by Sex
Endocrinology	42	0.933333	45											2009	39.46%	58.26%			2009	43.66%	35.94%
Behavioral Physiology	46	0.938776	49											2019	60.54%	41.74%			2019	56.34%	64.06%
Reproduction	11	1	11
HUMAN STUDIES	HUMAN STUDIES 2019													HUMAN STUDIES 2009
Discipline	Males	%Male	Females	%Female	Both	%Both	Sex not specified	%NotSpecified	Total	Analyzed by sex	%Analyzed by sex			Males	%Male	Females	%Female	Both	%Both	Sex not specified	%Notspecified	Total
General Biology	0	0	2	0.117647	14	0.823529	1	0.0588235	17	2	0.142857			3	0.136364	1	0.0454545	15	0.681818	3	0.136364	22
Immunology	0	0	1	0.0526316	17	0.894737	1	0.0526316	19	9	0.529412			1	0.0714286	1	0.0714286	8	0.571429	4	0.285714	14
Neuroscience	3	0.15	0	0	16	0.8	1	0.05	20	6	0.375			2	0.153846	0	0	10	0.769231	1	0.0769231	13
Physiology	3	0.176471	2	0.117647	10	0.588235	2	0.117647	17	4	0.4			6	0.333333	0	0	7	0.388889	5	0.277778	18
Pharmacology	4	0.333333	0	0	7	0.583333	1	0.0833333	12	3	0.428571			2	0.1	1	0.05	15	0.75	2	0.1	20
Endocrinology	3	0.0909091	6	0.181818	24	0.727273	0	0	33	13	0.541667			4	0.2	1	0.05	15	0.75	0	0	20
Reproduction	0	0	13	0.928571	1	0.0714286	0	0	14	1	1			4	0.333333	7	0.583333	0	0	1	0.0833333	12
Behavioral Physiology	3	0.136364	2	0.0909091	17	0.772727	0	0	22	8	0.470588			1	0.125	2	0.25	5	0.625	0	0	8
Behavior	1	0.166667	0	0	5	0.833333	0	0	6	4	0.8			1	0.2	0	0	4	0.8	0	0	5
TOTAL	17	0.10625	26	0.1625	111	0.69375	6	0.0375	160	50	0.45045			24	0.181818	13	0.0984848	79	0.598485	16	0.121212	132
Rationale for single-sex studies or lack of sex-based analyses					Description of Rationale	N	(%)
Discipline	N Studies				Increased experimental variability	8	0.266667
General Biology	2				Knowledge of sex-differences or effects	9	0.3
Immunology	2				Experimental conditions	4	0.133333
Neuroscience	5				Limited sample size	4	0.133333
Physiology	5				Inability to sex subjects	3	0.1
Pharmacology	3				Animal husbandry	2	0.0666667
Endocrinology	6
Reproduction	0
Behavioral Physiology	3
Behavior	4
TOTAL	30

## Sheet: Rationale Table 
Category	Rationale	Variability			Category	Article #	Journal
General Biology	"studies in the fetal period used the male offspring while studies in the adult period used the female offspring, as ewe lambs are easier to group house when compared to growing rams"	Animal Husbandry			General Biology	11	Nature		Volume 565 Issue 7739, 17 January 2019	Subcellular transcriptomes and proteomes of developing axon projections in the cerebral cortex
Physiology	"We observed some difficulties when dealing with the female ob mice....Cleaning this out is quite time consuming, and we concentrated on male ob mice"	Animal Husbandry			General Biology	2	PLOS Biology		January 22, 2019 https://doi.org/10.1371/journal.pbio.2006552	Intervention against hypertension in the next generation programmed by developmental hypoxia	January 22, 2019 https://doi.org/10.1371/journal.pbio.2006552	Intervention against hypertension in the next generation programmed by developmental hypoxia
Immunology	"Experiments on Foxp3Sf mice and FoxpWT littermate controls were done in male mice because the Foxp3Sf allele is X-linked and the experiments could not be done in female mice. Th9 transfer experiments were all done in male mice because Foxp3Sf donor Th9 cells were obtained from male mice and could not be transferred to female recipients due to risk of rejection. All remaining experiments were don…	Experimental Factors			Immunology	4	Immunity		January 15, 2019 Volume 50, Issue 1	Retinoic Acid Receptor Alpha Represses a Th9 Transcriptional and Epigenomic Program to Reduce Allergic Pathology
Immunology	"We only used male mice in this study to avoid potential artifacts that may arise in gender mismatched adoptive transfer (AT) settings.	Experimental Factors			Immunology	4	Immunity		January 15, 2019 Volume 50, Issue 1	Retinoic Acid Receptor Alpha Represses a Th9 Transcriptional and Epigenomic Program to Reduce Allergic Pathology
Endocrinology	Because collecting vaginal smears to control oestrous cycle in females would add an extra layer of stress to our experiments, we performed the experiments in male pups only.	Experimental Factors			Neuroscience	11	Neuroscience	Systems	January 1, 2019; Volume 396	Auditory Midbrain Hypoplasia and Dysmorphology after Prenatal Valproic Acid Exposure
Behavior	"Because adult males and juveniles of either sex rarely called, we report data from adult females only"	Experimental Factors			Neuroscience	1	J. Comp. Neurol		February 1, 2019; Volume 527,Issue2	Deep hypothermia reverses behavioral and histological alterations in a rat model of perinatal asphyxia
General Biology	All animals analysed were P3 or younger, thus no sex determination was attempted. Analyses are thought to include animals of both sexes at approximately equal proportions."	Inability to determine sex			Neuroscience	10	Nature Neurosci.		February 2019; Volume 22, Issue 2	Loss of TREM2 function increases amyloid seeding but reduces plaque-associated ApoE
Neuroscience	"In all experiments, male and female littermates were pooled together and analyzed as one group"	Inability to determine sex			Neuroscience	9	J. Neurosci	Neurobiology of Disease	January 02, 2019; Volume 39,Issue 1	CTCF Governs the Identity and Migration of MGE-Derived Cortical Interneurons
Behavior	"….we were unable to consistently distinguish between male and female prairie dogs and therefore pooled both sexes in analyses.	Inability to determine sex			Neuroscience	5	J. Comp. Neurol		February 1, 2019; Volume 527,Issue3	Spatiotemporal distribution of glia in and around the developing mouse optic tract
Neuroscience	'"Because we have detected no difference in phenotype between male and female animals in past or present study of this animal model, results from both sexes were combined."	Knowledge of sex-differences or effects			Physiology	16	J. Physiol Lond	Exercise	Volume 597, Issue 2	Electrical pulse stimulation induces differential responses in insulin action in myotubes from severely obese individuals
Neuroscience	"At P21, litters were weaned and only male pups were included in the experiments described below as gender-specific effects of VPA exposure have been reported"	Knowledge of sex-differences or effects			Physiology	17	J. Physiol Lond	Pregnancy, placental and perinatal	Volume 597, Issue 2	SIRT1 overexpression attenuates offspring metabolic and liver disorders as a result of maternal high‐fat feeding
Physiology	"As we have previously shown sex‐specific downregulation of SIRT1 by MHF in male offspring (Nguyen et al. 2017), only male offspring were examined in the present study."	Knowledge of sex-differences or effects			Physiology	1	J. Physiol Lond	Cardiovascular	Volume 597, Issue 1	Increased endothelial shear stress improves insulin‐stimulated vasodilatation in skeletal muscle
Physiology	"No sex differences were detected on primary outcome variables; therefore, data from male and female subjects were pooled for analysis."	Knowledge of sex-differences or effects			Physiology	1	AJP Gastro Liver	Epithelial Biology and Secretion	Volume 316 Issue 1	Enhanced gastrointestinal passive paracellular permeability contributes to the obesity-associated hyperoxaluria
Pharmacology	"Because female mice are known to have a higher expression of retinoic X receptors and higher sensitivity to FXR agonists than males (Kosters et al., 2013), we focused on females in this study."	Knowledge of sex-differences or effects			Physiology	15	AJP Heart and Circ	Extracellular Matrix in Cardiovascular Pathophysiology	Volume 316 Issue 2	Maladaptive aortic remodeling in hypertension associates with dysfunctional smooth muscle contractility
Endocrinology	"Since historically, predominantly females are exposed to these estrogenic compounds through contraceptive use and estrogen replacement therapy, and lupus exhibits a strong female sex bias, for this study we investigated the effects of E2 and EE on female NZB/WF1 mice only."	Knowledge of sex-differences or effects			Pharmacology	14	British J. Pharm		Volume 176, Issue 7, Pages: 815-981, April 2019	Betulinic acid alleviates endoplasmic reticulum stress‐mediated nonalcoholic fatty liver disease through activation of farnesoid X receptors in mice
Endocrinology	All data presented are from female mice….n addition, neuronal deletion of RANK has been shown to be involved in thermoregulation in female but not male mice,1 although it is unknown exactly which neurones are involved in this process. Therefore, we also used our female NPYcre/+;RANKlox/lox mice to investigate whether NPY neurones contribute to the control of thermoregulation by RANK.	Knowledge of sex-differences or effects			Pharmacology	8	Neuropsychopharm		Volume 44 Issue 2, January 2019	Ventral midbrain astrocytes display unique physiological features and sensitivity to dopamine D2 receptor signaling
Behavioral Physiology	Thirty-two male Long Evans rats were obtained at 51–75 g...PPA has been associated with neurodevelopmental disorders including Autism Spectrum Disorders, which tends to occur more commonly in males than females [15]. As such, male rats were the primary focus in the present study, albeit a limitation, as there is a lack of research on the effect of PPA on female rats.	Knowledge of sex-differences or effects			Pharmacology	3	Neuropsychopharm		Volume 44 Issue 2, January 2019	A dose-finding study of oxytocin using neurophysiological measures of social processing
Physiology	"We focused upon a single gender, as there are sex differences in glucose metabolism"	Knowledge of sex-differences or effects			Endocrinology	11	J. Neuroendo		Volume 31, Issue 4, April 2019	Hyperthermia‐induced seizures followed by repetitive stress are associated with age‐dependent changes in specific aspects of the mouse stress system
Pharmacology	"we did not have the power to examine for sex effects in the current design"	Limited sample size			Endocrinology	7	Endocrinology	Reproductive Biology and Sex-Based Medicine	Volume 160, Issue 1, January 2019	17β-Estradiol and 17α-Ethinyl Estradiol Exhibit Immunologic and Epigenetic Regulatory Effects in NZB/WF1 Female Mice
Endocrinology	"Six of the eight participants were women and consequently the study was not designed to assess the effects of sex on the metabolic response to dietary intervention."	Limited sample size			Endocrinology	10	Eur. J. Endocrinology		Volume 180, Issue 2	Bone microarchitecture and volumetric bone density impairment in young male adults with childhood-onset growth hormone deficiency
Behavior	"We could not compare the sexes as only four of the 25 wood mice were females.However, we have previously shown that the sex of wood mice has no effects on seed management "	Limited sample size			Endocrinology	17	AJP Endo Metab	Translational Physiology	Volume 316, Issue 2, February 2019	Short-term low-calorie diet remodels skeletal muscle lipid profile and metabolic gene expression in obese adults
Behavior	"While we tested too few females (n = 2) to perform statistical tests comparing males and females, we saw no evidence of sex-based differences in behavior."	Limited sample size			Endocrinology	6	J. Neuroendo		Volume 31, Issue 2, February 2019	RANK deletion in neuropeptide Y neurones attenuates oestrogen deficiency‐related bone loss
Neuroscience	"To avoid the influence of hormonal changes, only male rats were included in this study."	Increased experimental variability			Endocrinology	18	Endocrinology	Parathyroid, Bone, and Mineral Metabolism	Volume 160, Issue 3, March 2019	The Role of Dickkopf-1 in Thyroid Hormone–Induced Changes of Bone Remodeling in Male Mice
Neuroscience	"Using male mice ensured reduced gender-dependent variability in plaque deposition."	Increased experimental variability			Behavioral physiology	19	Phys&Behav		Volume 199, Pages 1-404 (1 February 2019)	Structured, aerobic exercise reduces fat mass and is partially compensated through energy intake but not energy expenditure in women
Physiology	"To minimize extrinsic variability, we used adult wild-type mice (C57BL/6J, Jackson Laboratories) of the same sex (male) maintained on the same diet (normal) and exposed to the same light-dark cycles and limited exercise."	Increased experimental variability			Behavioral physiology	3	Phys&Behav		Volume 198, 1 January 2019	Influence of corticosterone on growth, home-cage activity, wheel running, and aerobic capacity in house mice selectively bred for high voluntary wheel-running behavior
Pharmacology	"we used males exclusively in these experiments to minimize possible variability resulting from sex differences"	Increased experimental variability			Behavioral physiology	17	Phys&Behav		Volume 199, Pages 1-404 (1 February 2019)	Predator odor exposure in early adolescence influences the effects of the bacterial product, propionic acid, on anxiety, sensorimotor gating, and acoustic startle response in male rats in later adolescence and adulthood
Endocrinology	"Female subjects were not enrolled to avoid potential gender-dimorphic variations in bone microarchitecture. "	Increased experimental variability			Behavior	14	Animal Behaviour		Volume 150, April 2019, Pages 59-68	Evidence of high individual variability in seed management by scatter-hoarding rodents: does ‘personality’ matter?
Endocrinology	"We included only male mice to limit possible confounding off-target effects of tamoxifen in young female mice and other sex hormone turbulences of female mice."	Increased experimental variability			Behavior	18	Behav Ecol Sociobiol		August 2019, 73:113	Habituation and ecological salience: insights into the foraging ecology of the fringed-lipped bat, Trachops cirrhosus
Behavioral Physiology	"Only women were recruited to reduce unwanted variability in the design"	Increased experimental variability			Behavior	10	Animal Behaviour		Volume 150, April 2019, Pages 59-68	The importance of individual variation in the alarm calls of Gunnison's prairie dogs
Behavioral Physiology	"We chose to use male mice, as female mice tend to have twice the levels of circulating CORT as males, and these levels may shift in response to stage of the estrus cycle"	Increased experimental variability			Behavior	16	Animal Behaviour		Volume 150, April 2019, Pages 59-68	Black-tailed prairie dog, Cynomys ludovicianus(Sciuridae), metapopulation response to novel sourced conspecific signals

## Sheet: Physiology
Discipline	Article #	Journal	Category	Date of issue	Article shorthand	Males	Females	Both	N of each sex provided	If both, data anylzed by sex?	Provide rationale for single sex use or analyses	Sex not specified	Mouse and Non-human primate	Method Excerpt
Physiology	11	AJP Gastro Liver	Neurogastroenterology and Motility	Volume 316 Issue 1	Effects of esophageal acidification on esophageal reflexes controlling the upper esophageal sphincter	0	0	1	0	0	0	0	Cat	These studies were conducted using domestic short hair cats (n = 31) of both sexes (17 males and 14 female)
Physiology	2	J. Physiol Lond	Exercise	Volume 597, Issue 1	On exercise thermoregulation in females: interaction of endogenous and exogenous ovarian hormones	0	1	0	0	0	0	0	Human	Ten aerobically well‐trained and competitive women cyclists and triathletes volunteered for this study.	Human
Physiology	3	J. Physiol Lond	Exercise	Volume 597, Issue 1	Exercise training reduces the insulin‐sensitizing effect of a single bout of exercise in human skeletal muscle	1	0	0	0	0	0	0	Human	Nine young (aged 25 ± 1 years), lean (body mass index 23.5 ± 0.5 kg m–2) and healthy men gave their written, informed consent to participate in the study	Mouse
Physiology	4	J. Physiol Lond	Exercise	Volume 597, Issue 1	Prolonged exercise training improves the acute type II muscle fibre satellite cell response in healthy older men	1	0	0	0	0	0	0	Human	Fourteen healthy older men (age: 74 ± 8 years; weight: 85 ± 14 kg; body mass index (BMI): 28 ± 4 kg m−2)	Hampster
Physiology	10	J. Physiol Lond	Neuroscience	Volume 597, Issue 1	Lower body negative pressure to safely reduce intracranial pressure	0	0	1	1	0	0	0	Human	Ten subjects with implanted devices allowing direct measurement of ICP were included [eight male; mean ± SD (range): age 38 ± 17 years (20–67); height 179 ± 8 cm (170–189); weight 79.9 ± 12 kg (58–90)].	Rat and Mouse
Physiology	12	J. Physiol Lond	Neuroscience	Volume 597, Issue 1	The dynamics of cortical GABA in human motor learning	0	0	1	1	0	0	0	Human	A full breakdown of group allocation including age and gender is provided in Table 1.	Other
Physiology	14	J. Physiol Lond	Cardiovascular	Volume 597, Issue 2	The impact of 2 years of high‐intensity exercise training on a model of integrated cardiovascular regulation	0	0	1	1	0	0	0	Human	All participants in the present study were drawn from a previously published study for which a detailed description of the subject population and sample size calculation has been provided
Physiology	16	J. Physiol Lond	Exercise	Volume 597, Issue 2	Electrical pulse stimulation induces differential responses in insulin action in myotubes from severely obese individuals	0	1	0	0	0	1	0	Human	Lean and severely obese Caucasian women were matched by age (n = 8 per group)….We focused upon a single gender, as there are sex differences in glucose metabolism
Physiology	4	AJP Renal	Translational Physiology	Volume 316, Issue 1	Serum and urinary SOD3 in patients with type 2 diabetes: comparison with early chronic kidney disease patients and association with development of diabetic nephropathy	0	0	1	1	0	0	0	Human	We recruited Taiwanese patients with type 2 diabetes into this study. Demographic and clinical data were recorded, including age, sex, duration of diabetes, weight, height, blood pressure, and medication...Table 1. Baseline demographic and clinical characteristics of patients with early CKD, patients with diabetes without CKD, and patients with diabetes with CKD
Physiology	11	AJP Renal		Volume 316, Issue 1	Plasma syndecan-1 in hemodialysis patients associates with survival and lower markers of volume status	0	0	1	1	1	0	0	Human	The characteristics of the 84 patients in this study are shown in Table 1. One-third of the participants were women.
Physiology	15	AJP Renal		Volume 316, Issue 1	Identifying cystogenic paracrine signaling molecules in cyst fluid of patients with polycystic kidney disease	0	0	0	0	0	0	1	Human	Kidney and liver explants were obtained from patients diagnosed with ADPKD who were scheduled for elective nephrectomy or hepatectomy.
Physiology	16	AJP Renal		Volume 316, Issue 1	Human serum albumin redox state is associated with decreased renal function in a community-dwelling population	0	0	1	1	1	0	0	Human	We grouped the participants based on their residential districts and randomly selected particular districts, yielding a study population of 286 subjects (126 men and 160 women).
Physiology	4	AJP Gastro Liver	Inflammation, Immunity, Fibrosis, and Infection	Volume 316 Issue 1	Assessment of liver fibrosis progression and regression by a serological collagen turnover profile	0	0	0	0	0	0	1	Human	Phase II, randomized, double-blinded, placebo-controlled multicenter study to determine the antifibrotic effect of a highly potent and specific peroxisome proliferator-activated receptor (PPAR)-γ agonist ...All patients provided written informed consent. Blood samples for biomarker evaluation were collected at baseline and after 52 wk.
Physiology	5	AJP Gastro Liver	Inflammation, Immunity, Fibrosis, and Infection	Volume 316 Issue 1	Crohn’s disease IRGM risk alleles are associated with altered gene expression in human tissues	0	0	1	1	1	0	0	Human	Subjects were recruited from the NIEHS EPR, which is a repository of DNA and associated demographic data from a cohort of >18,000 human subjects (~2/3 non-Hispanic White, ~1/4 non-Hispanic Black, remainder Asian, Hispanic, and Other) in North Carolina (8, 9). Covariates in adjusted models included age (at time of questionnaire completion), sex, tobacco use, and BMI.
Physiology	7	AJP Gastro Liver	Liver and Biliary Tract Physiology/Pathophysiology	Volume 316 Issue 1	Urinary acrolein metabolite levels in severe acute alcoholic hepatitis patients	0	0	1	1	1	0	0	Human	Clinical data include participant demographics [age, sex, body mass index (BMI)], drinking history…
Physiology	1	AJP Heart and Circ	Cardiovascular Neurohormonal Regulation	Volume 316 Issue 1	Evidence for differential control of muscle sympathetic single units during mild sympathoexcitation in young, healthy humans	0	0	1	1	0	0	0	Human	We recruited 47 healthy young men and women, 7 of whom completed both studies.
Physiology	10	AJP Heart and Circ	Translational Physiology	Volume 316 Issue 1	Enhanced nitric oxide signaling amplifies vasorelaxation of human colon cancer feed arteries	0	0	1	1	0	0	0	Human	Twenty-three women and twenty men with a mean age of 69 ± 14 (SD) yr (range: 37–92 yr) contributed biopsy material.
Physiology	18	AJP Heart and Circ	Right Ventricular Physiology in Health and Disease	Volume 316 Issue 2	Pulmonary hemodynamic and right ventricular responses to brief and prolonged exercise in middle-aged endurance athletes	1	0	0	0	0	0	0	Human	We studied healthy male runners, cyclists, and triathletes aged 45–65 yr who had a lifelong history of intensive endurance exercise…
Physiology	5	J. Physiol Lond	Respiratory	Volume 597, Issue 1	Leptin acts in the carotid bodies to increase minute ventilation during wakefulness and sleep and augment the hypoxic ventilatory response	1	0	0	0	0	0	0	Mouse	In total, 42 adult male C57BL/6J mice (Stock #000664), 30 adult male db/db mice on the C57BL/6J background (Stock #000697) 8–10 weeks of age, from the Jackson Laboratory (Bar Harbor, MA, USA), and five male LepRb‐EGFP mice were used in our experiments.	Cat
Physiology	6	J. Physiol Lond	Respiratory	Volume 597, Issue 1	The postnatal development of ultrasonic vocalization‐associated breathing is altered in glycine transporter 2‐deficient mice	0	0	0	0	0	0	1	Mouse	Mice were bred in the animal facility of the University Medical Centre Göttingen and kept under a 12:12 h light/dark cycle. Adult mice had access to food and water ad libitum and neonatal mice were fed by their mothers.	Dog
Physiology	9	J. Physiol Lond	Muscle	Volume 597, Issue 1	Elevation of extracellular osmolarity improves signs of myotonia congenita in vitro: a preclinical animal study	0	0	0	0	0	0	1	Mouse	to obtain ADR (adr/adr) mice, Balb/c × adr/+ females were mated with Balb/c × adr/+ males and raised in a pathogen‐free animal facility….	Other
Physiology	11	J. Physiol Lond	Neuroscience	Volume 597, Issue 1	Slow periodic activity in the longitudinal hippocampal slice can self‐propagate non‐synaptically by a mechanism consistent with ephaptic coupling	0	0	1	0	0	0	0	Mouse	Mice of either sex were anaesthetized by isoflurane and euthanized by decapitation.	Multiple species
Physiology	15	J. Physiol Lond	Endocrine, nutrition and metabolism	Volume 597, Issue 2	Exendin‐4 overcomes cytokine‐induced decreases in gap junction coupling via protein kinase A and Epac2 in mouse and human islets	0	0	0	0	0	0	1	Mouse	Pancreata were isolated from C57BL/6NHsd mice (The Jackson Laboratory, Bar Harbour, ME, USA) aged 8–16 weeks.
Physiology	17	J. Physiol Lond	Pregnancy, placental and perinatal	Volume 597, Issue 2	SIRT1 overexpression attenuates offspring metabolic and liver disorders as a result of maternal high‐fat feeding	1	0	0	0	0	1	0	Mouse	These female mice were mated with hemizygous transgenic sires (Tg) to produce both WT and Tg offspring without maternal genotypic modification As we have previously shown sex‐specific downregulation of SIRT1 by MHF in male offspring (Nguyen et al. 2017), only male offspring were examined in the present study.
Physiology	19	J. Physiol Lond	Molecular and cellular	Volume 597, Issue 2	Anticipation of food intake induces phosphorylation switch to regulate basolateral amino acid transporter LAT4 (SLC43A2) function	0	0	1	0	1	0	0	Mouse	Eighteen 8‐week‐old LAT4flx/flxROSACreERTwt (further referenced as WT LAT4 mice) and tamoxifen‐induced LAT4flx/flxROSACreERT+ mice (further referenced as LAT4 KO mice) of both genders, previously housed in standard laboratory conditions and fed 18% protein diet (Kliba Nafag, Kaiseraugst, Switzerland) ad libitum, were transferred to climate chambers with an inverted 12 h dark/light cycle....Mice w…
Physiology	20	J. Physiol Lond	Muscle	Volume 597, Issue 3	Induced in vivo knockdown of the Brca1 gene in skeletal muscle results in skeletal muscle weakness	0	0	1	0	0	0	0	Mouse	Mice were bred on a C57BL/6NJ background, and were a mix of male and female mice aged 30–34 weeks (weighing 30–50 g) at the time of death.
Physiology	1	AJP Renal	Inflammatory Mediators in Kidney and Bladder Diseases and Hypertension	Volume 316, Issue 1	SIRT1-mediated HMGB1 deacetylation suppresses sepsis-associated acute kidney injury	0	0	1	0	0	0	0	Mouse	In total, 178 specific pathogen-free C57BL/6 mice (equal number of males and females) weighing 18–22 g were used in this study.
Physiology	2	AJP Renal	Mechanism and Treatment of Renal Fibrosis	Volume 316, Issue 1	Moderate aging does not exacerbate cisplatin-induced kidney injury or fibrosis despite altered inflammatory cytokine expression and immune cell infiltration	1	0	0	0	0	0	0	Mouse	Eight- and 40-wk-old FVB/n mice were maintained on a 12:12-h light-dark cycle Endoplasmic reticulum stress and apoptosis with the standard-dosing regimen of cisplatin (0 or 25 mg/kg once) in 8- and 40-wk-old male FVB mice
Physiology	7	AJP Renal		Volume 316, Issue 1	Micro-CT imaging and structural analysis of glomeruli in a model of Adriamycin-induced nephropathy	1	0	0	0	0	0	0	Mouse	Inbred C57Bl/6 male mice (Genentech, Dixon, CA) were used for this study
Physiology	12	AJP Renal		Volume 316, Issue 1	Characterization of renal NaCl and oxalate transport in Slc26a6−/− mice	0	0	1	0	0	0	0	Mouse	Adult age-matched male or female 129S6/SvEv wild-type (WT) mice…
Physiology	13	AJP Renal		Volume 316, Issue 1	ADAMTS13 protects mice against renal ischemia-reperfusion injury by reducing inflammation and improving endothelial function	1	0	0	0	0	0	0	Mouse	Kidney I/R surgery was performed using male C57Bl/6 mice (8–12 wk) as previously reported…
Physiology	14	AJP Renal		Volume 316, Issue 1	SGLT2 inhibition and renal urate excretion: role of luminal glucose, GLUT9, and URAT1	1	0	0	0	0	0	0	Mouse	Adult male mice were used for all studies.
Physiology	17	AJP Renal	Mechanism and TreThe Gut-Liver Axisatment of Renal Fibrosis	Volume 316Issue 2	STAT1 regulates macrophage number and phenotype and prevents renal fibrosis after ischemia-reperfusion injury	1	0	0	0	0	0	0	Mouse	STAT1−/− mice with C57BL/6J background were kindly provided by Thomas Kolbe…8–12-wk-old male wild-type (WT) and STAT1−/− mice were anesthetized...Eight-week-old male C57BL/6J WT mice were injected with 3 ml sterile air
Physiology	18	AJP Renal	Mechanism and Treatment of Renal Fibrosis	Volume 316Issue 2	Peroxidasin and eosinophil peroxidase, but not myeloperoxidase, contribute to renal fibrosis in the murine unilateral ureteral obstruction model	0	0	1	0	0	0	0	Mouse	Experimental UUO was performed on Pxdn-KO, Mpo-KO, Epx-KO, and WT C57BL/6J male and female mice.
Physiology	20	AJP Renal	Sex and Gender in Renal Health and Function	Volume 316Issue 2	Renal olfactory receptor 1393 contributes to the progression of type 2 diabetes in a diet-induced obesity model	0	0	1	1	1	0	0	Mouse	Olfr1393 WT and KO mice (males and females) were generated and described previously
Physiology	1	AJP Gastro Liver	Epithelial Biology and Secretion	Volume 316 Issue 1	Enhanced gastrointestinal passive paracellular permeability contributes to the obesity-associated hyperoxaluria	1	0	0	0	0	1	0	Mouse	The ob mice and their lean littermate controls (males; 8–12 wk old; on a C57BL/6J background) were obtained from the Jackson laboratory. BALB/c (males; 8–12 wk old) were obtained from the Harlan laboratory. We observed some difficulties when dealing with the female ob mice....Cleaning this out is quite time consuming, and we concentrated on male ob mice
Physiology	2	AJP Gastro Liver	Epithelial Biology and Secretion	Volume 316 Issue 1	Absence of the sulfate transporter SAT-1 has no impact on oxalate handling by mouse intestine and does not cause hyperoxaluria or hyperoxalemia	0	0	1	1	1	0	0	Mouse	A total of 64 mice of both sexes were used in the following experiments, ranging in age from 4 to 14 mo with a mean body mass of 26.6 ± 0.9 g, n = 32, for SAT-1-KO and 28.6 ± 1.0 g, n = 32, for WT controls.
Physiology	6	AJP Gastro Liver	Inflammation, Immunity, Fibrosis, and Infection	Volume 316 Issue 1	A novel role for programmed cell death receptor ligand 2 in sepsis-induced hepatic dysfunction	1	0	0	0	0	0	0	Mouse	Adult male mice ~8–12 wk of age were used for all experiments.
Physiology	8	AJP Gastro Liver	Liver and Biliary Tract Physiology/Pathophysiology	Volume 316 Issue 1	LGR4 protects hepatocytes from injury in mouse	1	0	0	0	0	0	0	Mouse	Twelve-week-old male mice were used in the present study.
Physiology	9	AJP Gastro Liver	Microbiome and Host Interactions	Volume 316 Issue 1	Distinct roles of histamine H1- and H2-receptor signaling pathways in inflammation-associated colonic tumorigenesis	1	0	0	0	0	0	0	Mouse	Two-month-old male mice were randomly divided into three groups (n = 8–11 mice per group, 3–4 mice per cage)
Physiology	13	AJP Gastro Liver	Nutrient Sensing, Nutrition, and Metabolism	Volume 316 Issue 1	Enterotoxigenic Escherichia coli heat labile enterotoxin inhibits intestinal ascorbic acid uptake via a cAMP-dependent NF-κB-mediated pathway	1	0	0	0	0	0	0	Mouse	Gulo knockout (KO) Swiss mice (BALB/c) weighing ∼25 g (8- to 10-wk-old male mice) were introduced
Physiology	14	AJP Gastro Liver	Nutrient Sensing, Nutrition, and Metabolism	Volume 316 Issue 1	Manipulating fenestrations in young and old liver sinusoidal endothelial cells	1	0	0	0	0	0	0	Mouse	Male C57/BL6 mice, 3–4 and 18–24 mo old, were obtained from the Animal Resource Centre in Perth, Western Australia
Physiology	16	AJP Gastro Liver	Nutrient Sensing, Nutrition, and Metabolism	Volume 316 Issue 1	Acute administration of IL-6 improves indices of hepatic glucose and insulin homeostasis in lean and obese mice	1	0	0	0	0	0	0	Mouse	For in vivo experiments, C57BL/6 male mice (8 wk old) were purchased from Charles River
Physiology	17	AJP Gastro Liver	Pancreatic Physiology/Pathophysiology	Volume 316 Issue 1	Transgenic expression of cyclooxygenase-2 in pancreatic acinar cells induces chronic pancreatitis	0	0	1	0	0	0	0	Mouse	Age- and sex-matched Cre mice were used as controls for all experiments. Both sexes were used.
Physiology	4	AJP Heart and Circ	Integrative Cardiovascular Physiology and Pathophysiology	Volume 316 Issue 1	Galectin-3 deficiency ameliorates fibrosis and remodeling in dilated cardiomyopathy mice with enhanced Mst1 signaling	1	0	0	0	0	0	0	Mouse	Only male mice were studied.
Physiology	5	AJP Heart and Circ	Muscle Mechanics and Ventricular Function	Volume 316 Issue 1	BMI1 promotes cardiac fibrosis in ischemia-induced heart failure via the PTEN-PI3K/Akt-mTOR signaling pathway	1	0	0	0	0	0	0	Mouse	Permanent ligation of the left anterior descending coronary artery (LAD) was conducted in 8-wk-old C57BL/6 male mice, as previously described
Physiology	6	AJP Heart and Circ	Right Ventricular Physiology in Health and Disease	Volume 316 Issue 1	Reversal of right ventricular failure by chronic α1A-subtype adrenergic agonist therapy	1	0	0	0	0	0	0	Mouse	Adult male C57BL/6J mice (Jackson Laboratory) were used (n = 73, age: 10–14 wk, and body weight: ≈25 g) at the beginning of the experiment.
Physiology	9	AJP Heart and Circ	Translational Physiology	Volume 316 Issue 1	Resistin promotes cardiac homing of mesenchymal stem cells and functional recovery after myocardial ischemia-reperfusion via the ERK1/2-MMP-9 pathway	1	0	0	0	0	0	0	Mouse	Adult male C57BL/6J mice were purchased from the Laboratory Animal Center of the Fourth Military Medical University.
Physiology	14	AJP Heart and Circ	Cardiac Excitation and Contraction	Volume 316 Issue 2	Atrial fibrillation and electrophysiology in transgenic mice with cardiac-restricted overexpression of FKBP12	0	0	0	0	0	0	1	Mouse	The αMyHC-FKBP12 transgenic mice used in this study were generated as previously described (17). The mice used for monitoring and optical mapping were 2–4 mo old.
Physiology	15	AJP Heart and Circ	Extracellular Matrix in Cardiovascular Pathophysiology	Volume 316 Issue 2	Maladaptive aortic remodeling in hypertension associates with dysfunctional smooth muscle contractility	1	0	0	0	0	1	0	Mouse	To minimize extrinsic variability, we used adult wild-type mice (C57BL/6J, Jackson Laboratories) of the same sex (male) maintained on the same diet (normal) and exposed to the same light-dark cycles and limited exercise.
Physiology	16	AJP Heart and Circ	Many Avenues to Cardiac Cell Death	Volume 316 Issue 2	Elimination or neutralization of endogenous high-molecular-weight FGF2 mitigates doxorubicin-induced cardiotoxicity	0	0	1	1	1	0	0	Mouse	Eight-week-old groups of male or female FGF2(WT) and FGF2(Lo) mice
Physiology	19	AJP Heart and Circ	Vascular Biology and Microcirculation	Volume 316 Issue 2	Na+/Ca2+ exchanger overexpression in smooth muscle augments cytosolic Ca2+ in femoral arteries of living mice	0	0	0	0	0	0	1	Mouse	SM-NCX1-TG mice (designated N1.3Tg/Tg-10) were originally generated by Prof. Takahiro Iwamoto….In a few experiments (see results), mice in which NCX1 was conditionally knocked out in smooth muscle (SM-NCX1-KO mice, abbreviated as “KO”) (57) were tested for comparison with Ctrl and TG mice.
Physiology	20	AJP Heart and Circ	Cancer Therapy-Induced Cardiovascular Toxicity	Volume 316 Issue 3	Role of renin-angiotensin system antagonists in the prevention of bevacizumab- and sunitinib-mediated cardiac dysfunction	1	0	0	0	0	0	0	Mouse	A total of 194 wild-type C57Bl/6 male mice (8–12 wk old, Jackson Laboratory, Bar Harbor, ME) were randomly assigned to the following three regimens
Physiology	1	J. Physiol Lond	Cardiovascular	Volume 597, Issue 1	Increased endothelial shear stress improves insulin‐stimulated vasodilatation in skeletal muscle	0	0	1	1	0	1	0	Multiple species	Intact female farm swine (n = 9; 3.6 ± 0.2 months of age; 30.9 ± 1.4 kg)...Eighteen healthy, recreationally active, subjects (10 men, 8 women)..No sex differences were detected on primary outcome variables; therefore, data from male and female subjects were pooled for analysis.	Rat
Physiology	15	AJP Gastro Liver	Nutrient Sensing, Nutrition, and Metabolism	Volume 316 Issue 1	Water intake increases mesenteric lymph flow and the total flux of albumin, long-chain fatty acids, and IL-22 in rats: new concept of absorption in jejunum	1	0	0	0	0	0	0	Multiple species	Male Sprague-Dawley rats (10–12 wk old; Japan SLC, Tokyo, Japan) were fed a standard pellet diet...Ten 22- to 26-mo-old male Japanese rabbits were used. The rabbits
Physiology	8	AJP Heart and Circ	Translational Physiology	Volume 316 Issue 1	Mixed lineage kinase-3 prevents cardiac dysfunction and structural remodeling with pressure overload	1	0	0	0	0	0	0	Multiple species	Nonfailing (NF) donor hearts were obtained from the National Disease Research Interchange….Only male 10- to 12-wk-old mice were used for these studies.
Physiology	6	AJP Renal		Volume 316, Issue 1	Identification of novel metabolomic biomarkers in an experimental model of septic acute kidney injury	1	0	0	0	0	0	0	Other	After overnight fasting, male pigs weighing 27 kg (SD 4) were sedated intramuscularly
Physiology	10	AJP Gastro Liver	Neurogastroenterology and Motility	Volume 316 Issue 1	Identification of multiple distinct neurogenic motor patterns that can occur simultaneously in the guinea pig distal colon	0	0	1	0	0	0	0	Other	Duncan-Hartley guinea pigs (n = 176) of either sex, weighing 280–640 g were used.
Physiology	18	AJP Gastro Liver	The Gut-Liver Axis	Volume 316 Issue 1	Abdominal organ perfusion and inflammation in experimental sepsis: a magnetic resonance imaging study	1	0	0	0	0	0	0	Other	Sixteen male piglets, between 2 and 3 mo old, and with a median weight of 26 kg…
Physiology	7	J. Physiol Lond	Renal	Volume 597, Issue 1	RAAS inhibitors directly reduce diabetes‐induced renal fibrosis via growth factor inhibition	1	0	0	0	0	0	0	Rat	Six‐week‐old male Wistar rats (Rattus norvegicus, RGD Cat. No. 13508588, RRID:RGD_13508588) were purchased from “Toxi‐Coop” Toxicological Research Centre	Sheep
Physiology	8	J. Physiol Lond	Renal	Volume 597, Issue 1	Evidence against a crucial role of renal medullary perfusion in blood pressure control of hypertensive rats	1	0	0	0	0	0	0	Rat	The procedures used in experiments performed with male Sprague‐Dawley (S‐D) or in male spontaneously hypertensive rats (SHR)	Non-human primate
Physiology	13	J. Physiol Lond	Neuroscience	Volume 597, Issue 1	Glycinergic neurotransmission in the rostral ventrolateral medulla controls the time course of baroreflex‐mediated sympathoinhibition	1	0	0	0	0	0	0	Rat	Male Sprague–Dawley rats were purchased from ENVIGO (Indianapolis, IN, USA) and the Animal Resources Centre (Murdoch, WA, Australia).
Physiology	18	J. Physiol Lond	Respiratory	Volume 597, Issue 2	Protein kinase Cδ constrains the S‐pathway to phrenic motor facilitation elicited by spinal 5‐HT7 receptors or severe acute intermittent hypoxia	1	0	0	0	0	0	0	Rat	A total of 112 adult male Sprague Dawley rats (208A Colony, Envigo, IN, USA; 300–400 g, ∼3.5 months old) were used in this study
Physiology	3	AJP Renal	Mechanism and Treatment of Renal Fibrosis	Volume 316, Issue 1	Renal release of N-acetyl-seryl-aspartyl-lysyl-proline is part of an antifibrotic peptidergic system in the kidney	1	0	0	0	0	0	0	Rat	Male Sprague-Dawley rats (Charles River) weighing 250–350 g were used for all experiments.
Physiology	5	AJP Renal		Volume 316, Issue 1	Renal cold storage followed by transplantation impairs proteasome function and mitochondrial protein homeostasis	1	0	0	0	0	0	0	Rat	Male Lewis rats (200–250 g) were used as transplant donors and recipients.
Physiology	8	AJP Renal		Volume 316, Issue 1	Aerobic interval exercise improves renal functionality and affects mineral metabolism in obese Zucker rats	1	0	0	0	0	0	0	Rat	Twenty male obese (fa/fa) (O) and 20 lean heterozygous (fa/+) (L) Zucker rats (6 wk old) with an initial mean body weight of 179 ± 2.8 and 148 ± 3.4 g, respectively, were allocated into 4 different experimental groups (2 obese and 2 lean groups, n = 10).
Physiology	9	AJP Renal		Volume 316, Issue 1	NFAT5 regulates renal gene expression in response to angiotensin II through Annexin-A2-mediated posttranscriptional regulation in hypertensive rats	1	0	0	0	0	0	0	Rat	Male Wistar rats (WistarHanTac, Taconic, Denmark; n = 8 controls and n = 12 2K1C) were used to induce 2K1C hypertension as previously described using a 0.2-mm sliver clip
Physiology	10	AJP Renal		Volume 316, Issue 1	Bladder decompensation and reduction in nerve density in a rat model of chronic bladder outlet obstruction are attenuated with the NLRP3 inhibitor glyburide	0	1	0	0	0	0	0	Rat	Adult, female Sprague-Dawley rats (≈49 days, 200 g) were used in all experiments.
Physiology	19	AJP Renal	Sex and Gender in Renal Health and Function	Volume 316Issue 2		0	0	1	1	1	0	0	Rat	After weaning, male and female rats were randomly divided in four groups and were fed until 4 mo of age with either a normal-fat diet (NFD)
Physiology	3	AJP Gastro Liver	Inflammation, Immunity, Fibrosis, and Infection	Volume 316 Issue 1	Molecular characterization of a precision-cut rat liver slice model for the evaluation of antifibrotic compounds	1	0	0	0	0	0	0	Rat	Male Sprague-Dawley rats weighing between 250 and 300 g were purchased from Charles River Laboratories.
Physiology	12	AJP Gastro Liver	Neurogastroenterology and Motility	Volume 316 Issue 1	5-HT3 receptor signaling in serotonin transporter-knockout rats: a female sex-specific animal model of visceral hypersensitivity	0	0	1	1	1	0	0	Rat	Age-matched 3- to 4-mo-old rats were used for all experiments. Male and female rats in this age group weighed ∼350 and 220 g, respectively.
Physiology	19	AJP Gastro Liver	Translational Physiology	Volume 316 Issue 1	Prolonged intake of desloratadine: mesenteric lymphatic vessel dysfunction and development of obesity/metabolic syndrome	1	0	0	0	0	0	0	Rat	For the present studies, we used male Sprague-Dawley rats with an average entry body weight for all experimental groups of 171 ± 13 g (6 wk old).
Physiology	20	AJP Gastro Liver	Hormones, Neurotransmitters, Growth Factors, Receptors, and Signaling	Volume 316 Issue 2	Cyclic AMP-dependent protein kinase A and EPAC mediate VIP and secretin stimulation of PAK4 and activation of Na+,K+-ATPase in pancreatic acinar cells	1	0	0	0	0	0	0	Rat	Male Sprague-Dawley rats (100–120 g) were obtained from the Small Animals Section
Physiology	3	AJP Heart and Circ	Integrative Cardiovascular Physiology and Pathophysiology	Volume 316 Issue 1	Diabetes mellitus attenuates the pressure response against hypotensive stress by impairing the sympathetic regulation of the baroreflex afferent arc	1	0	0	0	0	0	0	Rat	We used 15- to 17-wk-old male ZDF fatty rats
Physiology	7	AJP Heart and Circ	Sex Differences in Cardiovascular and Cerebrovascular Physiology, Disease, and Signaling Mechanisms	Volume 316 Issue 1	Sex differences in the central and peripheral manifestations of ischemia-induced heart failure in rats	0	0	1	1	1	0	0	Rat	Adult male and female Sprague-Dawley rats (12 wk of age) were obtained from Envigo/Harlan
Physiology	11	AJP Heart and Circ	Vascular Biology and Microcirculation	Volume 316 Issue 1	Potential pitfalls in analyzing structural uncoupling of eNOS: aging is not associated with increased enzyme monomerization	1	0	0	0	0	0	0	Rat	Young (3- to 4-mo-old) and aged (22- to 25-mo-old) male Fischer-344 rats
Physiology	12	AJP Heart and Circ	Vascular Biology and Microcirculation	Volume 316 Issue 1	VNUT and VMAT2 segregate within sympathetic varicosities and localize near preferred Cav2 isoforms in the rat tail artery	0	0	1	1	0	0	0	Rat	Sprague-Dawley rats (male, 4–30 wk of age, Envigo) were euthanized by asphyxiation…The tail artery and brain were collected from each of two adult rats (male, 56 wk; and female, 60 wk),
Physiology	13	AJP Heart and Circ	Cancer Therapy-Induced Cardiovascular Toxicity	Volume 316 Issue 2	Estrogen but not testosterone preserves myofilament function from doxorubicin-induced cardiotoxicity by reducing oxidative modifications	0	0	1	1	1	0	0	Rat	Female Sprague-Dawley rats weighing between 180 and 200 g (7–8 wk old) and male Sprague-Dawley rats
Physiology	17	AJP Heart and Circ	Muscle Mechanics and Ventricular Function	Volume 316 Issue 2	Synergy between sacubitril and valsartan leads to hemodynamic, antifibrotic, and exercise tolerance benefits in rats with preexisting heart failure	1	0	0	0	0	0	0	Rat	Ninety Sprague-Dawley male rats (weighing 375–425 g, Charles Rivers Laboratories, Wilmington, MA) were randomly assigned into the following six groups
Physiology	2	AJP Heart and Circ	Integrative Cardiovascular Physiology and Pathophysiology	Volume 316 Issue 1	IL-13 promotes in vivo neonatal cardiomyocyte cell cycle activity and heart regeneration	0	0	1	0	0	0	0	Rat and Mouse	Data were pooled from male and female mice for all in vivo experiments.
					TOTALS:	41	3	29	19	12	5	7
Table Analyzed	Physiology Analyses				Table Analyzed	Physiology Both Sexes
P value and statistical significance					P value and statistical significance
Test	Chi-square				Test	Chi-square
Chi-square, df	0.4068, 1				Chi-square, df	12.24, 1
z	0.6378				z	3.499
P value	0.5236				P value	0.0005
P value summary	ns				P value summary	***
One- or two-sided	Two-sided				One- or two-sided	Two-sided
Statistically significant (P < 0.05)?	No				Statistically significant (P < 0.05)?	Yes
Data analyzed	Analyzed By Sex	Did Not Analyze by Sex	Total		Data analyzed	Both Sexes	Did Not Analyze by Sex	Total
2009	3	7	10		2009	10	70	80
2019	12	17	29		2019	29	51	80
Total	15	24	39		Total	39	121	160
Percentage of row total	Analyzed By Sex	Did Not Analyze by Sex			Percentage of row total	Both Sexes	Did Not Analyze by Sex
2009	30.00%	70.00%			2009	12.50%	87.50%
2019	41.38%	58.62%			2019	36.25%	63.75%
Percentage of column total	Analyzed By Sex	Did Not Analyze by Sex			Percentage of column total	Both Sexes	Did Not Analyze by Sex
2009	20.00%	29.17%			2009	25.64%	57.85%
2019	80.00%	70.83%			2019	74.36%	42.15%

## Sheet: General Biology
Discipline	Article #	Journal	Category	Date of issue	Article shorthand	Males	Females	Both	N of each sex provided	If both, data anylzed by sex?	Provide rationale for single sex use or analyses	Sex not specified	Mouse and Non-human primate	Method Excerpt
General Biology	8	PLOS Biology		March 5, 2019https://doi.org/10.1371/journal.pbio.3000144	Laws of concatenated perception: Vision goes for novelty, decisions for perseverance	0	0	1	1	0	0	0	Human	A total of 110 subjects (79 females, mean age = 23.08 ± 3.93 years)—37 from the University of Verona, Italy, and 73 from the University of Fribourg, Switzerland—participated in this study		Rat
General Biology	9	PLOS Biology		March 13, 2019https://doi.org/10.1371/journal.pbio.3000025	Perceptual inference employs intrinsic alpha frequency to resolve perceptual ambiguity	0	0	1	1	0	0	0	Human	Nineteen adult participants (12 females, mean age of 19.6 years old) took part in the EEG experiment. Another group of 20 adult participants (12 females, mean age of 23.4 years old) took part in the fMRI experiment		Human
General Biology	11	PLOS Biology		March 21, 2019https://doi.org/10.1371/journal.pbio.3000026	Chronotopic maps in human supplementary motor area	0	0	1	1	0	0	0	Human	We tested a total of 21 healthy volunteers, 11 in Exp 1 (5 females, mean age 23.7 years, SD 4.3 years) and 10 in Exp 2 (9 females, mean age 27.7 years, SD 5.1 years) with normal or corrected-to-normal vision.		Mouse
General Biology	19	PLOS Biology		April 30, 2019https://doi.org/10.1371/journal.pbio.3000233	Expectation and attention increase the integration of top-down and bottom-up signals in perception through different pathways	0	0	0	0	0	0	1	Human	All participants were university students aged between 18 and 34 years. A total of n = 15 out of 24 participants were included in the analysis of Experiment 1, and n = 11 out of 16 in Experiment 2		Hampster
General Biology	20	PLOS Biology		April 26, 2019https://doi.org/10.1371/journal.pbio.3000239	Item-specific delay activity demonstrates concurrent storage of multiple active neural representations in working memory	0	0	1	0	0	0	0	Human	The sample included both male and female participants.		Cat
General Biology	4	Proc. Roy Soc. B	Behaviour	6 February 2019, Volume 286, Issue 1896	Physiological arousal predicts gaze following in infants	0	0	1	0	0	0	0	Human	Twenty-five (12 females and 13 males) 10-month-old infants completed the study.		Dog
General Biology	7	Proc. Roy Soc. B	Evolution	6 February 2019, Volume 286, Issue 1896	Secular changes in body height predict global rates of caesarean section	0	1	0	0	0	0	0	Human	Data were obtained by national surveys, routine vital statistics and reports from health authorities, including the ‘European Health for All' database of the World Health Organization (WHO) and international health surveys of Unicef.		Sheep
General Biology	9	Proc. Roy Soc. B	Neuroscience and cognition	6 February 2019, Volume 286, Issue 1896	Disruptive coloration and binocular disparity: breaking camouflage	0	0	1	1	0	0	0	Human	Accordingly, 30 participants (17 females, aged 18–26) with normal or corrected-to-normal vision completed the experiment.		Non-human primate
General Biology	10	Proc. Roy Soc. B	Neuroscience and cognition	20 February 2019, Volume 286, Issue 1897	Survival of retinal ganglion cells after damage to the occipital lobe in humans is activity dependent	0	0	1	1	0	0	0	Human	We prospectively studied 15 patients (four females, mean age = 63.7 years) with homonymous visual field defects secondary to stroke		Other
General Biology	11	Proc. Roy Soc. B	Behaviour	6 March 2019, Volume 286, Issue 1898	Interoceptive accuracy moderates the response to a glucose load: a test of the predictive coding framework	0	1	0	0	0	0	0	Human	100 females between 18 and 33 years were recruited		Rat and Mouse
General Biology	12	Proc. Roy Soc. B	Behaviour	6 March 2019, Volume 286, Issue 1898	Moralizing gods, impartiality and religious parochialism across 15 societies	0	0	1	1	0	0	0	Human	During two waves of data collection, we recruited a total of 2228 participants from 15 societies (1126 females; M age = 37.0, s.d. = 14.8).		Multiple species
General Biology	15	Proc. Roy Soc. B	Genetics and Genomics	20 March 2019, Volume 286, Issue 1899	Genomic evidence for MHC disassortative mating in humans	0	0	1	1	1	0	0	Human	ore details about recruitment and clinical description of samples are given in the papers describing this dataset [41–44].		Other
General Biology	18	Proc. Roy Soc. B	Behaviour	17 April 2019, Volume 286, Issue 1901	Cross-cultural similarity in relationship-specific social touching	0	0	1	1	1	0	0	Human	Data of 255 Japanese individuals (124 male, 40.1 ± 14.6 years) and 386 British individuals (214 male, 46.0 ± 12.6. years) were analysed.
General Biology	7	Nature		Volume 565 Issue 7738, 10 January 2019	Neoantigen vaccine generates intratumoral T cell responses in phase Ib glioblastoma trial	0	0	1	1	0	0	0	Human	Patient demographics and treatment characteristics of eight vaccinated patients
General Biology	8	Nature		Volume 565 Issue 7738, 10 January 2019	Actively personalized vaccination trial for newly diagnosed glioblastoma	0	0	1	1	0	0	0	Human	Table 1 Baseline characteristics and key outcomes for enrolled patients (n = 16)
General Biology	10	Nature		Volume 565 Issue 7739, 17 January 2019	Age-related remodelling of oesophageal epithelia by mutated cancer drivers	0	0	1	1	0	0	0	Human	Characteristics of these patients and healthy individuals are summarized in Supplementary Table 1.
General Biology	15	Science		8 February 2019, Vol 363, Issue 6427	Impact of preexisting dengue immunity on Zika virus emergencein a dengue endemic region	0	0	1	1	0	0	0	Human	Characteristics of cohort individuals according to their ZIKV IgG3 serological status
General Biology	1	PLOS Biology		January 31, 2019 https://doi.org/10.1371/journal.pbio.2006994	Coordinated electrical activity in the olfactory bulb gates the oscillatory entrainment of entorhinal networks in neonatal mice	0	0	1	0	0	0	0	Mouse	Male mice underwent sensory manipulation, light stimulation, pharmacological treatment, and multisite electrophysiological recordings at P8–10. For CLARITY experiments, male and female mice were used.
General Biology	4	PLOS Biology		January 17, 2019 https://doi.org/10.1371/journal.pbio.2006571	Organic cation transporter 3 (Oct3) is a distinct catecholamines clearance route in adipocytes mediating the beiging of white adipose tissue	1	0	0	0	0	0	0	Mouse	Male mice were 8 to 10 weeks of age when used for experiments.
General Biology	5	PLOS Biology		February 21, 2019 https://doi.org/10.1371/journal.pbio.2006094	Trpm4 ion channels in pre-Bötzinger complex interneurons are essential for breathing motor pattern but not rhythm	0	0	1	0	0	0	0	Mouse	For anatomy or physiology experiments (see below), we used Dbx1;Ai9, GlyT2-eGFP, and wild-type CD-1 mice of both sexes at postnatal day 0 to 4
General Biology	6	PLOS Biology		February 4, 2019 https://doi.org/10.1371/journal.pbio.3000133	Lens differentiation is controlled by the balance between PDGF and FGF signaling	0	0	1	0	0	0	0	Mouse	Mouse embryos were fixed with 4% paraformaldehyde (PFA) in PBS overnight and paraffin- or cryo-embedded...Ten newly born mouse pups were dissected in cold PBS, and the lenses were rolled over on an autoclaved filter paper
General Biology	7	PLOS Biology		February 8, 2019https://doi.org/10.1371/journal.pbio.3000134+	Proximal recolonization by self-renewing microglia re-establishes microglial homeostasis in the adult mouse brain	0	0	1	0	0	0	0	Mouse	Equal numbers of male and female mice were used for all experiments except for the RNA-seq experiment, which used only female mice.
General Biology	12	PLOS Biology		March 1, 2019https://doi.org/10.1371/journal.pbio.2006211	Rods contribute to the light-induced phase shift of the retinal clock in mammals	0	0	1	0	0	0	0	Mouse	We used female and male mice in all experiments.
General Biology	13	PLOS Biology		March 1, 2019https://doi.org/10.1371/journal.pbio.3000161	Physiology and effects of nucleosides in mice lacking all four adenosine receptors	0	0	1	1	1	0	0	Mouse	Growth, metabolism, and blood characteristics were measured in cohorts of male and female mice…
General Biology	14	PLOS Biology		March 20, 2019https://doi.org/10.1371/journal.pbio.3000172	Lateral hypothalamic neurotensin neurons promote arousal and hyperthermia	1	0	0	0	0	0	0	Mouse	Male mice aged 8–12 wk and weighing between 20 and 24 g at the time of surgery were used for behavioral experiments, and 4-wk-old mice were used for ex vivo brain slice recordings.
General Biology	15	PLOS Biology		March 18, 2019https://doi.org/10.1371/journal.pbio.2007097	Serotonin receptor HTR6-mediated mTORC1 signaling regulates dietary restriction–induced memory enhancement	1	0	0	0	0	0	0	Mouse	Male mice were used in this study,
General Biology	16	PLOS Biology		March 1, 2019https://doi.org/10.1371/journal.pbio.3000169	TLR9-mediated dendritic cell activation uncovers mammalian ganglioside species with specific ceramide backbones that activate invariant natural killer T cells	1	0	0	0	0	0	0	Mouse	8- to 12-week-old male WT C57BL/6J mice were purchased from Janvier
General Biology	17	PLOS Biology		March 28, 2019https://doi.org/10.1371/journal.pbio.2006859	Prophylactic TLR9 stimulation reduces brain metastasis through microglia activation	0	0	1	1	1	0	0	Mouse	Male and female mice were used.
General Biology	20	Proc. Roy Soc. B	Development and Physiology	1 May 2019, Volume 286, 1902	Dietary macronutrient content, age-specific mortality and lifespan	0	0	1	0	0	0	0	Mouse	Briefly, male and female C57BL6/J mice (inbred with minimal genetic variation) were kept on one of a number of diets from three weeks of age.
General Biology	1	Nature		Volume 565 Issue 7737, 3 January 2019	Loss of ADAR1 in tumours overcomes resistance to immune checkpoint blockade	0	1	0	0	0	0	0	Mouse	Six-week-old wild-type female C57BL/6J mice were obtained from Jackson laboratories.
General Biology	3	Nature		Volume 565 Issue 7737, 3 January 2019	Metabolic reprogramming by the S-nitroso-CoA reductase system protects against kidney injury	0	0	1	1	1	0	0	Mouse	Mice of similar age (9–11 weeks) and body weight (male: 25–28 g; female: 22–25 g) were used for surgery.
General Biology	4	Nature		Volume 565 Issue 7737, 3 January 2019	Metabolic heterogeneity underlies reciprocal fates of TH17 cell stemness and plasticity	0	0	1	0	0	0	0	Mouse	Age- and sex-matched mice were assigned randomly to experimental and control groups
General Biology	5	Nature		Volume 565 Issue 7738, 10 January 2019	Thermal stress induces glycolytic beige fat formation via a myogenic state	1	0	0	0	0	0	0	Mouse	All the mice were 12–16-week-old males
General Biology	6	Nature		Volume 565 Issue 7738, 10 January 2019	De novo design of potent and selective mimics of IL-2 and IL-15	0	0	0	0	0	0	1	Mouse	Mice (C57BL/6J, The Jackson Laboratory) were inoculated intranasally….cells were injected subcutaneously into the flanks of BALB/c mice purchased from Charles River…
General Biology	9	Nature		Volume 565 Issue 7738, 10 January 2019	Brain regulatory T cells suppress astrogliosis and potentiate neurological recovery	1	0	0	0	0	0	0	Mouse	Male mice were used at 8–12 weeks of age.
General Biology	11	Nature		Volume 565 Issue 7739, 17 January 2019	Subcellular transcriptomes and proteomes of developing axon projections in the cerebral cortex	0	0	1	0	0	1	0	Mouse	Experiments using wild-type mice were performed on outbred strain CD1 mouse pups of both sexes (Charles River Laboratories). All animals analysed were P3 or younger, thus no sex determination was attempted. Analyses are thought to include animals of both sexes at approximately equal proportions.
General Biology	14	Nature		Volume 565 Issue 7739, 17 January 2019	SETD3 is an actin histidine methyltransferase that prevents primary dystocia	0	1	0	0	0	0	0	Mouse	Male mice began breeding at 8 weeks and female mice at 6 weeks. Typically, mice no older than 6 months were used in this study. Quantification of pregnancies and litters for both trio- or pair-breeding females were tabulated for Setd3−/−, Setd3+/− and Setd3+/+ females.
General Biology	15	Nature		Volume 565 Issue 7740, 24 January 2019	LHX2- and LDB1-mediated trans interactions regulate olfactory receptor choice	0	0	1	0	0	0	0	Mouse	Both male and female mice were used for experiments.
General Biology	16	Nature		Volume 565 Issue 7740, 24 January 2019	Mitochondrial complex III is essential for suppressive function of regulatory T cells	0	1	0	0	0	0	0	Mouse	Spleen, lymph nodes (always included all superficial and periaortic lymph nodes) and thymus were collected from day-10 postnatal, three-week-old and adult (8–12-week-old) mice….we generated chimeric female mice that were homozygous for the floxed Uqcrsf1 allele and heterozygous for Foxp3YFP-cre (RISP chimeric KO mice; YFP marks cells with active Cre recombinase).
General Biology	17	Nature		Volume 565 Issue 7740, 24 January 2019	Human blood vessel organoids as a model of diabetic vasculopathy	0	0	0	0	0	0	1	Mouse	we differentiated human iPS cells into vascular organoids in vitro and transplanted them under the kidney capsule of immunodeficient NOD/SCID/IL2Rγnull (NSG) mice
General Biology	18	Nature		Volume 565 Issue 7740, 24 January 2019	HIF-1α metabolically controls collagen synthesis and modification in chondrocytes	1	0	0	0	0	0	0	Mouse	Analysis was performed on 2.5-day-old (P2.5), 10 day-old (P10) or 14-week-old male mice unless stated otherwise.
General Biology	20	Nature		Volume 565 Issue 7741, 31 January 2019	Interacting neural ensembles in orbitofrontal cortex for social and feeding behaviour	1	0	0	0	0	0	0	Mouse	Adult (~30 g, 8–10 weeks of age) male C57BL/6J mice (Jackson Laboratory, strain #000664) were maintained on a reverse 12-h dark–light cycle
General Biology	2	Science		04 January 2019, Vol 363, Issue 6422	Commensal-specific T cell plasticity promotes rapid tissue adaptation to injury	0	0	1	0	0	0	0	Mouse	Sex- and age-matched mice between 6 and 35 weeks of age were used for each experiment.
General Biology	3	Science		04 January 2019, Vol 363, Issue 6422	A collicular visual cortex: Neocortical space for an ancient midbrain visual structure	0	0	1	0	0	0	0	Mouse	Data were collected from male or female C57BL6 mice or from heterozygous VGat-ChR2 (JAX#014548) (32) and Gad2-Cre (JAX#010802) (33) transgenic animals.
General Biology	4	Science		11 January 2019, Vol 363, Issue 6423	Secreted amyloid-β precursor protein functions as a GABABR1a ligand to modulate synaptic transmission	0	0	0	0	0	0	1	Mouse	Thy1-GCaMP6s mice (C57BL/6J-Tg(Thy1-GCaMP6s)GP4.12Dkim/J; JAX stock 025776) (72) (2-3 months old) were placed on a warming plate and anesthetized with isoflurane and respiration closely monitored for all surgical and experimental procedures…..Hippocampal neurons were cultured from E18 C57/Bl6 wild type mice or APP/APLP1 double knock out (dKO) mice
General Biology	5	Science		11 January 2019, Vol 363, Issue 6423	Chronic TLR7 and TLR9 signaling drives anemia via differentiation of specialized hemophagocytes	0	0	0	0	0	0	1	Mouse	TLR7.1 mice were obtained from S. Bolland (NIH) (16), Spic−/− (Spictm1Kmm) Myd88−/−(Myd88tm1.1Defr/J), and SpiciGFP/+ (Spictm2.1Kmm) mice from Jackson Labs (13, 20, 48), Ccr2-DTR mice from T. Hohl (MSKCC) (49), and BALB/c, C57BL/6, and B6.SJL mice from Jackson Labs. Irf5−/− mice were used on both C57BL/6 and BALB/c backgrounds (23).
General Biology	7	Science		11 January 2019, Vol 363, Issue 6423	Cell-autonomous clock of astrocytes drives circadian behavior in mammals	1	0	0	0	0	0	0	Mouse	All the experiments were performed on healthy mice, with normal immune status, housed in a specific pathogen free (SPF) unit. Wheel-running behavior of individually caged (8-16 weeks old) Cry1/2-null male mice kept was recorded in light-tight chambers with food and water provided ad libitum.
General Biology	8	Science		18 January 2019, Vol 363, Issue 6424	An amygdalar neural ensemble that encodes the unpleasantness of pain	1	0	0	0	0	0	0	Mouse	For behavioral manipulation and neuroanatomy experiments, we utilized FosCreERT2 mice (B6.129(Cg)-Fostm1.1(cre/ERT2)Luo/J, Jackson Laboratory, stock #21882, male, aged 8–15 weeks at the start of all experiments). For BLA miniature microscope imaging experiments, we utilized C57Bl/6J mice (Jackson Laboratory, stock #664, male, aged 8–12 weeks at the start of experiments). For dorsomedial striatum …
General Biology	9	Science		18 January 2019, Vol 363, Issue 6424	Strain-specific antibody therapy prevents cytomegalovirus reactivation after transplantation	0	1	0	0	0	0	0	Mouse	Female mice at 8 to 12 weeks of age were used for primary MCMV infection.
General Biology	10	Science		25 January 2019, Vol 363, Issue 6425	Single-cell profiling identifies myeloid cell subsets with distinct fates during neuroinflammation	0	0	0	0	0	0	1	Mouse	C57BL/6N mice were used as WT mice and all transgenic lines (Cx3cr1CreERT2, Cd11cCre, Cd2gfp, Ccr2RFP, and H2-Ab1flox) were on a C57BL/6 background. Mice were bred in-house under pathogen-free conditions. Cx3cr1CreERT2 were crossed to either R26tdTomato or R26Confettimice.
General Biology	11	Science		25 January 2019, Vol 363, Issue 6425	Distinct molecular programs regulate synapse specificity in cortical inhibitory circuits	0	0	1	0	0	0	0	Mouse	we used fluorescence-activated cell sorting to isolate interneurons from genetically modified mice in which dendritic-, somatic-, and AIS-targeting GABAergic interneurons are enriched and labeled (table S1) (7–12). We isolated interneurons both before (P5 or P8) and during peak (P10) synaptogenesis
General Biology	12	Science		1 February 2019, Vol 363, Issue 6426	Linking a mutation to survival in wild mice	0	0	1	0	0	0	0	Mouse	Prior to introduction, we anesthetized each mouse and recorded sex, age, length, weight, and pigmentation phenotype (see below).
General Biology	13	Science		1 February 2019, Vol 363, Issue 6426	Intense threat switches dorsal raphe serotonin neurons to a paradoxical operational mode	1	0	0	0	0	0	0	Mouse	All mice were male and housed in groups, and were maintained on a 12-hour reverse light-dark cycle with ad libitum access to food and water, except during approach conditioning.
General Biology	14	Science		8 February 2019, Vol 363, Issue 6427	Separating host and microbiome contributions to drug pharmacokinetics and toxicity	0	0	1	1	0	0	0	Mouse	Murine fecal samples were collected from individually caged animals (2 males and 2 females) and were stored at -80°C without further processing….In brief, groups of 3 male C57BL/6 mice were used for each drug (BRV, SRV, and CLZ) and each route of administration
General Biology	18	Science		8 February 2019, Vol 363, Issue 6427	Choline acetyltransferase–expressing T cells are required to control chronic viral infection	0	0	1	0	0	0	0	Mouse	For protracted infections,6-8-week-old male or female mice were infected i.v. with 2×106 PFU of LCMV-Clone 13.
General Biology	20	Science		8 February 2019, Vol 363, Issue 6427	Innate immune recognition of glycans targets HIV nanoparticle immunogens to germinal centers	0	0	1	0	0	0	0	Mouse	For trafficking in knockout animals, equal mixtures of female and male mice were used due to availability...Female mice 6-10 weeks of age were immunized with immunogen and adjuvant via subcutaneous tail-base injection with 50 µl on either side of the tail.
General Biology	3	PLOS Biology		January 29, 2019 https://doi.org/10.1371/journal.pbio.2006972	Insulin resistance disrupts epithelial repair and niche-progenitor Fgf signaling during chronic liver injury	0	1	0	0	0	0	0	Multiple species	WT and Irs2−/− C57BL/6 littermates (females aged 10–12 weeks, fasting blood glucose < 100 mg/dL) were fed a modified LabDie
General Biology	10	PLOS Biology		March 22, 2019https://doi.org/10.1371/journal.pbio.2005346	A blueprint of mammalian cortical connectomes	0	0	0	0	0	0	1	Multiple species	Mouse - male, cat - meta-analysis, NHP - no description of sex
General Biology	1	Proc. Roy Soc. B	Behaviour	2 January 2019, Volume 286, Issue 1894	Human children but not chimpanzees make irrational decisions driven by social comparison	0	0	1	1	0	0	0	Multiple species	Fifteen chimpanzees (8 females) ranging in age from 8 to 37 years (M = 20 years) participated in this study. Fifteen chimpanzees (8 females) ranging in age from 8 to 37 years (M = 20 years) participated in this study.
General Biology	8	Proc. Roy Soc. B	Evolution	6 February 2019, Volume 286, Issue 1896	Maternal longevity and offspring sex in wild ungulates	0	0	1	1	1	0	0	Multiple species	Soay sheep (Ovis aries), bighorn sheep (Ovis canadensis), red deer (Cervus elaphus) and mountain goat (Oreamnos americanus).
General Biology	2	Nature		Volume 565 Issue 7737, 3 January 2019	Identifying the pathways required for coping behaviours associated with sustained pain	0	0	1	1	1	0	0	Multiple species	For each behavioural analysis, 6–15 pairs of 10–14-week-old ablated and control mice—including males and females—were used. Twelve healthy women and thirteen healthy men…
General Biology	13	Nature		Volume 565 Issue 7739, 17 January 2019	All mice were female and aged between 6–12 weeks at the beginning of experiments.	0	0	1	1	0	0	0	Multiple species	All mice were female and aged between 6–12 weeks at the beginning of experiments. All samples analysed in this study were from lymph-node or skin metastases and a detailed clinical overview of all the patients has been described previously17.
General Biology	19	Nature		Volume 565 Issue 7741, 31 January 2019	A defined commensal consortium elicits CD8 T cells and anti-cancer immunity	0	0	1	0	0	0	0	Multiple species	SPF or germ-free C57BL/6, BALB/c and IQI mice of both sexes were purchased from Sankyo Laboratories, Japan SLC, CLEA Japan, and Charles River Japan. University according to the study protocol approved by the Institutional Review Boards (approval numbers H24-9 and 20150075, respectively). Informed consent was obtained from each subject.
General Biology	16	Science		8 February 2019, Vol 363, Issue 6427	An ingestible self-orienting system for oral delivery of macromolecules	0	0	1	0	0	0	0	Multiple species	Female Yorkshire swine were obtained from Tufts University (Medford, USA) for in vivo experiments...Three rats (Charles River Labs, Sprague Dawley 400-450 g in weight)...
General Biology	19	Science		8 February 2019, Vol 363, Issue 6427	Tumor metastasis to lymph nodes requires YAP-dependent metabolic adaptation	0	0	1	0	0	0	0	Multiple species	male C57BL/6J or female BALB/c mice...Patient demographics and clinical characteristics wereobtained from electronic medical records.
General Biology	18	PLOS Biology		April 19, 2019https://doi.org/10.1371/journal.pbio.3000080	Task-related hemodynamic responses are modulated by reward and task engagement	1	0	0	0	0	0	0	Non-human primate	Two male rhesus macaques (Macaca mulatta) were used in the study.
General Biology	3	Proc. Roy Soc. B	Behaviour	6 February 2019, Volume 286, Issue 1896	Linguistic laws in chimpanzee gestural communication	0	0	1	0	0	0	0	Non-human primate	We conducted observations on the chimpanzees of the Sonso community in Budongo Forest Reserve, Uganda. At the time of study, the community consisted of 81 identifiable members. We defined age classes as: infants (0–4 years), juveniles (5–9 years), subadults (female: 10–14 years, male: 10–15 years) and adults (female: greater than or equal to 15 years; male: greater than or equal to 16 years).
General Biology	5	Proc. Roy Soc. B	Behaviour	6 February 2019, Volume 286, Issue 1896	From groups to communities in western lowland gorillas	0	0	1	0	1	0	0	Non-human primate	Molecular sexing was successful for 277 of these and failed for the other two due to low quality DNA. Of these individuals, 64 (51%) were males and 61 (49%) females.
General Biology	17	Proc. Roy Soc. B	Evolution	3 April 2019, Volume 286, Issue 1900	Sexual ornaments but not weapons trade off against testes size in primates	1	0	0	0	0	0	0	Non-human primate	literature data for 103 primate species on the presence/absence of female monopolization, social group size and sexually dimorphic traits that play important roles in male–male contest competition (sexual dimorphism in body mass and canine height [42]) and/or female choice (visual ornaments such as fleshy swellings, colourful skin patches or hairy traits [35,43]).
General Biology	19	Proc. Roy Soc. B	Behaviour	17 April 2019, Volume 286, Issue 1901	Chimpanzees (Pan troglodytes) coordinate by communicating in a collaborative problem-solving task	0	0	1	1	0	0	0	Non-human primate	Ten chimpanzees (six females, four males) living at Sweetwaters Chimpanzee Sanctuary, Kenya participated in this study.
General Biology	17	Science		8 February 2019, Vol 363, Issue 6427	Schema cells in the macaque hippocampus	0	0	0	0	0	0	1	Non-human primate	We trained two rhesus macaques to navigate with a joystick in virtual 3-D star mazes.
General Biology	2	Proc. Roy Soc. B	Ecology	3 January 2019, Volume 286, Issue 1894	The demography of a resource specialist in the tropics: Cecropia trees and the fitness of three-toed sloths	0	0	1	1	1	0	0	Other	We captured 54 three-toed sloths, 19 males, 21 females, and 14 juveniles in the shade-grown cacao plantation, surrounding cattle pastures and riparian forests.
General Biology	6	Proc. Roy Soc. B	Ecology	6 February 2019, Volume 286, Issue 1896	Cost of dispersal in a social mammal: body mass loss and increased stress	0	1	0	0	0	0	0	Other	We measured body mass and faecal glucocorticoid metabolite (fGCM) concentrations from 95 dispersing females
General Biology	13	Proc. Roy Soc. B	Behaviour	20 March 2019, Volume 286, Issue 1899	Northern bottlenose whales in a pristine environment respond strongly to close and distant navy sonar signals	0	0	1	1	0	0	0	Other	Twelve northern bottlenose whales were instrumented with animal-borne tags (electronic supplementary material, table S1) and subsequently exposed to naval sonar signals in two experiments
General Biology	14	Proc. Roy Soc. B	Ecology	20 March 2019, Volume 286, Issue 1899	Long-term trends in wild-capture and population dynamics point to an uncertain future for captive elephants	0	1	0	0	0	0	0	Other	The final studbook was a female-only dataset (n = 3585, wild-caught = 1215) with individuals from 11 out of the 14 regional divisions
General Biology	16	Proc. Roy Soc. B	Global change and conservation	20 March 2019, Volume 286, Issue 1899	Future suitability of habitat in a migratory ungulate under climate change	0	0	1	1	1	0	0	Other	A total of 62 male and 127 female individual red deer covering 89 and 163 seasons, respectively, were available for summer analyses (nobs = 670 328), and 53 male and 110 female red deer covering 119 and 244 seasons, respectively, were available for winter analyses (nobs = 842 238).
General Biology	12	Nature		Volume 565 Issue 7739, 17 January 2019	A wireless closed-loop system for optogenetic peripheral neuromodulation	0	1	0	0	0	0	0	Rat	Adult (200–300 g) female Sprague-Dawley rats (Taconic) housed in pairs with access to food and water ad libitum were maintained on a 12 h:12 h light:dark cycle (lights on at 6:00).
General Biology	6	Science		11 January 2019, Vol 363, Issue 6423	Emergence of preconfigured and plastic time-compressed sequences in early postnatal development	1	0	0	0	0	0	0	Rat	On P21, the pups were weaned, and littermates were housed together. Electrophysiological recordings were performed on 19 male rat pups aged P15-P24 on their day 1 of electrophysiological recording. For comparison purposes, the data obtained in the developing animals were grouped in two-day age groups of 3-5 animals starting at P15 (P15-16, P17-18, P19-20, P21-22, P23-24, see Supplementary Table 1…
General Biology	1	Science		04 January 2019, Vol 363, Issue 6422	Synaptotagmin-3 drives AMPA receptor endocytosis, depression of synapse strength, and forgetting	1	0	0	0	0	0	0	Rat and Mouse	Behavioral experiments were performed on 3- to 9-month-old male mice by a male experimenter, except for the Barnes maze, where a male experimenter performed intraperitoneal injections and a female experimenter performed experiments. Acute hippocampal slices were prepared from 8 to 12-week-old male mice anesthetized with isoflurane and decapitated.Rat hippocampi were isolated from E18-19 Wistar ra…
General Biology	2	PLOS Biology		January 22, 2019 https://doi.org/10.1371/journal.pbio.2006552	Intervention against hypertension in the next generation programmed by developmental hypoxia	0	0	1	1	0	1	0	Sheep	If male, then the fetuses were assigned to the fetal studies group; female fetuses were assigned to the adult offspring studies group. studies in the fetal period used the male offspring while studies in the adult period used the female offspring, as ewe lambs are easier to group house when compared to growing rams.A second limitation of the current program of work is that outcome variables in th…
					TOTALS:	15	10	47	25	10	2	8
Table Analyzed	General Biology Both Sexes				Table Analyzed	General Biology Analyses
P value and statistical significance					P value and statistical significance
Test	Chi-square				Test	Chi-square
Chi-square, df	10.06, 1				Chi-square, df	2.160, 1
z	3.171				z	1.47
P value	0.0015				P value	0.1417
P value summary	**				P value summary	ns
One- or two-sided	Two-sided				One- or two-sided	Two-sided
Statistically significant (P < 0.05)?	Yes				Statistically significant (P < 0.05)?	No
Data analyzed	Both Sexes	Single Sex or Unspecified	Total		Data analyzed	Analyzed By Sex	Did Not Analyze by Sex	Total
2009	27	53	80		2009	10	17	27
2019	47	33	80		2019	10	37	47
Total	74	86	160		Total	20	54	74
Percentage of row total	Both Sexes	Single Sex or Unspecified			Percentage of row total	Analyzed By Sex	Did Not Analyze by Sex
2009	33.75%	66.25%			2009	37.04%	62.96%
2019	58.75%	41.25%			2019	21.28%	78.72%
Percentage of column total	Both Sexes	Single Sex or Unspecified			Percentage of column total	Analyzed By Sex	Did Not Analyze by Sex
2009	36.49%	61.63%			2009	50.00%	31.48%
2019	63.51%	38.37%			2019	50.00%	68.52%

## Sheet: Immunology
Discipline	Article #	Journal	Category	Date of issue	Article shorthand	Males	Females	Both	N of each sex provided	If both, data anylzed by sex?	Provide rationale for single sex use or analyses	Sex not specified	Rat	Method Excerpt
Immunology	18	Infection and Immunity	Microbial Immunity and Vaccines	February 2019; volume 87,issue 2	Rickettsia rickettsii Whole-Cell Antigens Offer Protection against Rocky Mountain Spotted Fever in the Canine Host	0	0	1	1	0	0	0	Dog	Purebred beagle dogs (4 to 6 months old of both sexes) were purchased from a class A USDA vendor (Covance Research Products, Denver, PA) and housed in indoor climate-controlled facilities at Kansas State University as previously described		Rat
Immunology	6	Infection and Immunity	Host Response and Inflammation	January 2019; volume 87,issue 1	Gene Expression Differences in Host Response to Schistosoma haematobium Infection	0	0	1	1	1	0	0	Human	we analyzed peripheral blood gene expression in 33 individuals: 6 women and 5 men with S. haematobium infection and 14 women and 8 men without schistosome infection.		Human
Immunology	20	Infection and Immunity	Fungal and Parasitic Infections	March 2019; volume 87,issue 3		0	0	1	0	0	0	0	Human	Malaria-naive subjects (males and females between the ages of 18 and 55 years) residing in the Washington, DC		Mouse
Immunology	1	Vaccine		Volume 37, Issue 1 Pages 1-210 (3 January 2019)	Studying PCV impact on clinical presentation of otitis media helps to understand its pathogenesis	0	0	1	0	0	0	0	Human	Study population comprised children <3 years old with OM episodes resulting in MEF culture obtained between July 2004 and June 2016		Hampster
Immunology	3	Vaccine		Volume 37, Issue 1 Pages 1-210 (3 January 2019)	Prioritization of risk groups for influenza vaccination in resource limited settings – A case study from South Africa	0	0	1	0	0	0	0	Human	For each risk group (pregnant women, HIV-infected adults, children aged 6–23 months1, adults aged 65 years and older, healthcare workers, adults and children with tuberculosis disease (all ages), and adults and children aged 5–64 years with non-HIV chronic illness) we sought to identify data on risk of hospitalization or death from influenza infection, population size, influenza vaccine efficacy …		Cat
Immunology	4	Vaccine		Volume 37, Issue 1 Pages 1-210 (3 January 2019)	Vaccine preventable invasive bacterial diseases in Italy: A comparison between the national surveillance system and recorded hospitalizations, 2007–2016	0	0	1	1	1	0	0	Human	The following variables were included: age group at hospital admission (11 age groups: newborns <1 month of life, children 1–12 months of age, 1–4, 5–9, 10–14, 15–19, 20–24, 25–29, 30–34, 35–59 and ≥60 years old), gender, nationality (i.e., Italian, non-Italian), geographical area of residence (northern, central or southern Italy as defined by the Italian National Bureau of Census), month of hosp…		Dog
Immunology	6	Vaccine		Volume 37, Issue 1 Pages 1-210 (3 January 2019)	Similar relative risks of seizures following measles containing vaccination in children born preterm compared to full-term without previous seizures or seizure-related disorders	0	0	1	1	1	0	0	Human	children who received their first dose of measles-containing vaccine at age 12 through 23 months from January 1, 2003 through September 30, 2015		Sheep
Immunology	9	Vaccine		Volume 37, Issue 1 Pages 1-210 (3 January 2019)	Vaccine-driven serotype-rearrangement is seen with latency in clinical isolates: Comparison of carried and clinical pneumococcal isolates from the same time period in Hungary	0	0	1	1	1	0	0	Human	206 pneumococcal carriage isolates from healthy children and 146 clinical isolates from patients with manifest infections were analysed, all deriving from the same time period, March 2015 to May 2016...t3o be able to make a more direct comparison with the carriers, patients were divided into two age groups: 63 isolates came from patients <7 years (P1; 27 males, 36 females) and 83 isolates ≥7 year…		Non-human primate
Immunology	10	Vaccine		Volume 37, Issue 1 Pages 1-210 (3 January 2019)	Seroprevalence of pertussis among healthcare workers: A cross-sectional study from Tunisia	0	0	1	1	1	0	0	Human	Socio-demographic variables were collected using a questionnaire and included: age, gender, profession and the hospital department the participant was working in (surgery, internal medicine, laboratory, etc)...Blood samples were obtained from enrolled participants and centrifuged, then sera were stored at −20 °C until analysis		Other
Immunology	11	Vaccine		Volume 37, Issue 1 Pages 1-210 (3 January 2019)	Interferon gamma (IFN-γ) negative CD4+ and CD8+ T-cells can produce immune mediators in response to viral antigens	0	0	1	0	0	0	0	Human	This study obtained residual PBMC specimens from two earlier MRC/UVRI cross-sectional cohorts, whose participants had previously consented to donate blood for use in future HIV-1 vaccine discovery research studies...The parent healthy cohort comprised 59 healthy HIV-uninfected adult men and women		Rat and Mouse
Immunology	13	Vaccine		Volume 37, Issue 1 Pages 1-210 (3 January 2019)	Acquisition rate of antibody to hepatitis B surface antigen among medical and dental students in Japan after three-dose hepatitis B vaccination	0	0	1	1	1	0	0	Human	832 medical and dental students of Hiroshima University who had received the standard three-dose HB vaccine subcutaneously according to the WHO-recommended schedule of 0, 1, and 6 months...remaining 491 students (289 males and 202 females) were the subjects of the final analysis.		Multiple species
Immunology	15	Vaccine		Volume 37, Issue 1 Pages 1-210 (3 January 2019)	Immunogenicity and safety of 11- and 12-valent pneumococcal non-typeable Haemophilus influenzae protein D-conjugate vaccines (11vPHiD-CV, 12vPHiD-CV) in infants: Results from a phase II, randomised, multicentre study	0	0	1	1	0	0	0	Human	Healthy infants 6–12 weeks of age who had not been previously vaccinated against S. pneumoniae and did not meet any of the exclusion criteria...The groups were balanced in terms of age and sex distribution		Other
Immunology	16	Vaccine		Volume 37, Issue 1 Pages 1-210 (3 January 2019)	Impact of an electronic medical record reminder on hepatitis B vaccine initiation and completion rates among insured adults with diabetes mellitus	0	0	1	1	1	0	0	Human	There were 2391 individuals (51% males) during the 12-months pre-implementation period and 15,724 individuals (51% males) during the 12-months post-implementation period who were eligible for the third dose of HepB vaccine at KPSC.
Immunology	18	Vaccine		Volume 37, Issue 2 Pages 211-400 (7 January 2019)	Licensing the first reduced, 6 µg dose whole virion, aluminum adjuvanted seasonal influenza vaccine – A randomized-controlled multicenter trial	0	0	1	1	0	0	0	Human	Subjects eligible for enrolment into this study were: male and female adult volunteers aged 18 years or older, mentally competent, able to understand and comply with all study requirements...Distributions of subjects by sex and previous influenza vaccination were summarized overall and by vaccine group and age group
Immunology	19	Vaccine		Volume 37, Issue 2 Pages 211-400 (7 January 2019)	Adverse pregnancy outcomes and infant mortality after quadrivalent HPV vaccination during pregnancy	0	1	0	0	0	0	0	Human	The study population consisted of all births and all pregnancies not resulting in birth (spontaneous abortions, induced abortions, molar and ectopic pregnancies, and other pregnancy outcomes) in Denmark ending from October 1, 2006 to December 31, 2014
Immunology	20	Vaccine		Volume 37, Issue 2 Pages 211-400 (7 January 2019)	Use of different combination diphtheria-tetanus-acellular pertussis vaccines does not increase risk of 30-day infant mortality. A population-based linkage cohort study using administrative data from the Australian Childhood Immunisation Register and the National Death Index.	0	0	1	1	0	0	0	Human	Children listed on ACIR were matched with NDI data using combinations of first, middle initial and last names, birthdate and gender. Three data files relating to individuals, administered vaccines and death information (occurrence, cause and date of death) were provided,
Immunology	3	J. Immunol	Immune Regulation	January 1, 2019 : Vol. 202, Issue 1: 1-308	Neutrophil and Granulocytic Myeloid-Derived Suppressor Cell–Mediated T Cell Suppression Significantly Contributes to Immune Dysregulation in Common Variable Immunodeficiency Disorders	0	0	1	1	0	0	0	Human	A total of 46 CVID patients (25 females, 21 males; median age 45, range 22–82 y) and 44 healthy donors (23 females, 21 males; median age 41, range 19–78 y) were recruited.
Immunology	11	J. Immunol	Tumor Immunology	January 1, 2019 : Vol. 202, Issue 1: 1-308	Composition and Clinical Impact of the Immunologic Tumor Microenvironment in Oral Squamous Cell Carcinoma	0	0	1	1	1	0	0	Human	Forty-two (61.8%) patients were male; twenty-four (38.2%) were female.
Immunology	13	J. Immunol	Clinical and Human Immunology	January 15, 2019 : Vol. 202, Issue 2: 325-624	HBHA-Induced Polycytotoxic CD4+ T Lymphocytes Are Associated with the Control of Mycobacterium tuberculosis Infection in Humans	0	0	1	1	1	0	0	Human	The demographic characteristics of the participants enrolled in this study are summarized in Table I, ...the difference between high and low proportions of these cells did not correlate with any clinical parameter (age, sex, or ethnicity; remote or recent LTBI; treated LTBI versus...
Immunology	16	J. Immunol	Infectious Disease and Houst Response	January 15, 2019 : Vol. 202, Issue 2: 325-624	Cytomegalovirus Exposure in the Elderly Does Not Reduce CD8 T Cell Repertoire Diversity	0	0	0	0	0	0	1	Human	543 donors, frozen PBMC samples were obtained from the Fred Hutchinson Cancer Research Center Research Cell Bank biorepository of healthy bone marrow donors. All donors used met the medical criteria set by the national marrow donor programs. These samples were previously tested for CMV serostatus (31). For the aged cohort of eight donors (≥70 y), fresh blood samples were obtained from the Fred Hu…
Immunology	1	Infection and Immunity	Cellular Microbiology	January 2019; volume 87,issue 1	Atg5 Supports Rickettsia australis Infection in Macrophages In Vitro and In Vivo	0	0	0	0	0	0	1	Mouse	WT B6 mice were purchased from The Jackson Laboratory (catalog number 000664). Atg5flox/flox Lyz-Cre and Atg5flox/flox (control) mice were kindly provided by Noboru Mizushima at the Tokyo Medical and Dental University in Japan and Herbert Virgin IV at the Washington University School of Medicine in St. Louis, MO (33, 41).
Immunology	2	Infection and Immunity	Cellular Microbiology	January 2019; volume 87,issue 1	Bacterial Clearance Is Enhanced by α2,3- and α2,6-Sialyllactose via Receptor-Mediated Endocytosis and Phagocytosis	1	0	0	0	0	0	0	Mouse	Six-week-old male BALB/c mice were purchased from KOATECH Corporation (Gyeonggi-do, Republic of Korea)
Immunology	3	Infection and Immunity	Bacterial Infections	January 2019; volume 87,issue 1	Brucella neotomae Recapitulates Attributes of Zoonotic Human Disease in a Murine Infection Model	0	0	0	0	0	0	1	Mouse	BALB/c mice (Charles River Laboratories, Wilmington, MA), 4 to 6 weeks of age, were infected through i.p. inoculation.
Immunology	4	Infection and Immunity	Bacterial Infections	January 2019; volume 87,issue 1	H2S, a Bacterial Defense Mechanism against the Host Immune Response	1	0	0	0	0	0	0	Mouse	Male BALB/c mice (10 to 12 weeks of age; Envigo) were housed in a biosafety level 2 (BSL-2) animal facility under the supervision of the University of Texas Medical Branch (UTMB) Animal Resource Center and veterinarians
Immunology	5	Infection and Immunity	Bacterial Infections	January 2019; volume 87,issue 1	Acinetobacter baumannii OxyR Regulates the Transcriptional Response to Hydrogen Peroxide	0	0	0	0	0	0	1	Mouse	Mice were anesthetized by intraperitoneal injection of 2,2,2-tribromoethanol diluted in PBS.
Immunology	7	Infection and Immunity	Host Response and Inflammation	January 2019; volume 87,issue 1	Overlapping Roles for Interleukin-36 Cytokines in Protective Host Defense against Murine Legionella pneumophila Pneumonia	0	0	1	0	0	0	0	Mouse	Specific-pathogen-free age- and sex-matched C57BL/6 WT mice were purchased from The Jackson Laboratory
Immunology	10	Infection and Immunity	Microbial Immunity and Vaccines	January 2019; volume 87,issue 1	Controlled Infection Immunization Using Delayed Death Drug Treatment Elicits Protective Immune Responses to Blood-Stage Malaria Parasites	0	1	0	0	0	0	0	Mouse	Four- to 6-week-old female BALB/c and C57BL/6 mice were obtained from the Animal Resource Centre (ARC; Perth, Australia).
Immunology	12	Infection and Immunity	Molecular Pathogenesis	February 2019; volume 87,issue 2	Interplay of Nitric Oxide Synthase (NOS) and SrrAB in Modulation of Staphylococcus aureus Metabolism and Virulence	0	1	0	0	0	0	0	Mouse	A murine systemic infection model was performed using 8-week-old C57BL/6 female mice (The Jackson Laboratory).
Immunology	14	Infection and Immunity	Bacterial Infections	February 2019; volume 87,issue 2	Mycobacterium tuberculosis Requires Regulation of ESX-5 Secretion for Virulence in Irgm1-Deficient Mice	0	1	0	0	0	0	0	Mouse	Female C57BL/6J and NOS2−/− mice 6 to 8 weeks of age were purchased from Jackson Laboratories. Irgm1−/− mice were bred under specific-pathogen-free conditions at the University of Minnesota Research Animal Resources.
Immunology	15	Infection and Immunity	Host Response and Inflammation	February 2019; volume 87,issue 2	Peptidoglycan Recognition Protein 4 Suppresses Early Inflammatory Responses to Bordetella pertussis and Contributes to Sphingosine-1-Phosphate Receptor Agonist-Mediated Disease Attenuation	0	0	0	0	0	0	1	Mouse	C57BL/6, BALB/c (Charles River), or PGLYRP4–/– (kindly provided by R. Dziarski) animals were used in accordance with Institutional Animal Care and Use Committee protocol 0417005
Immunology	19	Infection and Immunity	Molecular Pathogenesis	March 2019; volume 87,issue 3	CitAB Two-Component System-Regulated Citrate Utilization Contributes to Vibrio cholerae Competitiveness with the Gut Microbiota	0	0	0	0	0	0	1	Mouse	The adult mouse model was used as described previously (38) with the following modifications. Five-week-old CD-1 mice were fed water containing streptomycin (0.5%) and aspartame... (0.4%) for 12 h before inoculation
Immunology	1	Immunity		January 15, 2019 Volume 50, Issue 1	The Nucleotide Sensor ZBP1 and Kinase RIPK3 Induce the Enzyme IRG1 to Promote an Antiviral Metabolic State in Neurons	0	0	1	0	0	0	0	Mouse	All mouse studies were performed in 5-6 week old (ZIKV studies) or 8 week old (WNV studies) animals of both sexes
Immunology	2	Immunity		January 15, 2019 Volume 50, Issue 1	Transcription Factor PU.1 Promotes Conventional Dendritic Cell Identity and Function via Induction of Transcriptional Regulator DC-SCRIPT	0	0	1	0	0	0	0	Mouse	Experiments involved male and female mice of 8-12 weeks of age
Immunology	3	Immunity		January 15, 2019 Volume 50, Issue 1	The Emergence and Functional Fitness of Memory CD4+ T Cells Require the Transcription Factor Thpok	0	0	0	0	0	0	1	Mouse	he Tnfrsf4-cre allele was maintained heterozygous and only female Tnfrsf4-cre+ mice were used for breeding. Except where specified otherwise, control mice included in experimental designs were Tnfrsf4-cre+ Zbtb7b+/+ or Tnfrsf4-cre– animals from the same line as experimental mice.
Immunology	4	Immunity		January 15, 2019 Volume 50, Issue 1	Retinoic Acid Receptor Alpha Represses a Th9 Transcriptional and Epigenomic Program to Reduce Allergic Pathology	0	0	1	0	0	1	0	Mouse	Experiments on Foxp3Sf mice and FoxpWT littermate controls were done in male mice because the Foxp3Sf allele is X-linked and the experiments could not be done in female mice. Th9 transfer experiments were all done in male mice because Foxp3Sf donor Th9 cells were obtained from male mice and could not be transferred to female recipients due to risk of rejection. All remaining experiments were done…
Immunology	6	Immunity		January 15, 2019 Volume 50, Issue 1	Fever Promotes T Lymphocyte Trafficking via a Thermal Sensory Pathway Involving Heat Shock Protein 90 and α4 Integrins	0	1	0	0	0	0	0	Mouse	Age-matched (8-10 weeks of age) female Itga4R985A/R985A mice and littermate controls were used.
Immunology	8	Immunity		January 15, 2019 Volume 50, Issue 1	Cell-Type-Specific Responses to Interleukin-1 Control Microbial Invasion and Tumor-Elicited Inflammation in Colorectal Cance	0	0	0	0	0	0	1	Mouse	All experiments used co-housed littermates, unless indicated otherwise, so that consistency of common microflora and genetic background/alterations would be ensured.
Immunology	9	Immunity		January 15, 2019 Volume 50, Issue 1	Checkpoint Blockade Immunotherapy Induces Dynamic Changes in PD-1−CD8+ Tumor-Infiltrating T Cells	0	0	0	0	0	0	1	Mouse	6-8 week old C57BL/6 and Rag−/− mice were purchased from the Jackson Laboratories.
Immunology	12	Immunity		January 15, 2019 Volume 50, Issue 1	Impaired Tumor-Necrosis-Factor-α-driven Dendritic Cell Activation Limits Lipopolysaccharide-Induced Protection from Allergic Inflammation in Infants	0	0	1	0	0	0	0	Mouse	Experiments were equally performed with male and female mice.
Immunology	14	Immunity		February 19, 2019, Volume 50, Issue 2	Cell-Type-Specific Interleukin 1 Receptor 1 Signaling in the Brain Regulates Distinct Neuroimmune Activities	0	0	1	0	0	0	0	Mouse	Recipient Il1r1r/r and Tie2-Cre-Il1r1r/r male mice (6 weeks old) were injected….Donor bone marrow-derived cells were isolated from the femur of Il1r1r/r female mice...For cell co-culture study, BV-2 cells (sex: female)...A 3-5 weeks old male mouse was put into an 18 × 8 x 8 cm metal wire enclosure...For primary culture, microglia were aseptically collected from male neonatal Il1r1r/r mouse pups o…
Immunology	15	Immunity		February 19, 2019, Volume 50, Issue 2	The Lupus Susceptibility Locus Sgp3 Encodes the Suppressor of Endogenous Retrovirus Expression SNERV	0	0	1	0	0	0	0	Mouse	Pregnant C57BL/6N and C57BL/6J female mice were sacrificed and E14.5 embryos were harvested and processed by first removing heads and livers...we crossed Snerv1/Snerv2+/+ (B6J wild-type) or Snerv1/Snerv2−/− females to NZB and 129 males to test for complementation.
Immunology	16	Immunity		February 19, 2019, Volume 50, Issue 2	Survival of Single Positive Thymocytes Depends upon Developmental Control of RIPK1 Kinase Signaling by the IKK Complex Independent of NF-κB	0	0	0	0	0	0	1	Mouse	Ripk1fx/fx Cd4Cre mice were breed at VIB. Ex vivo analysis of lymphoid organs was performed using mice between 8-12 weeks age unless otherwise specified. All mice are on a C57BL6/J background.
Immunology	18	Immunity		February 19, 2019, Volume 50, Issue 2	Chemokine Receptor Redundancy and Specificity Are Context Dependent	0	0	0	0	0	0	1	Mouse	CCR1-deficient, CCR2-deficient and CCR5-deficient were obtained and maintained on a C57BL/6 background, whereas CCR3-deficient mice were on a BALB/c background. All experiments were normalized to the appropriate WT controls. This involved comparison of all receptor-deficient mice on a C57BL/6 background with their precise congenic control and CCR3-deficient mice with BALB/c controls. All WT contr…
Immunology	20	Immunity		February 19, 2019, Volume 50, Issue 2	Liver-Resident NK Cells Control Antiviral Activity of Hepatic T Cells via the PD-1-PD-L1 Axis	0	0	1	0	0	0	0	Mouse	Mice were sex- and age-matched for individual experiments.
Immunology	2	Vaccine		Volume 37, Issue 1 Pages 1-210 (3 January 2019)	Escherichia coli expressed flagellin C (FliC) of Salmonella Typhi improved the protective efficacy of YopE against plague infection	0	1	0	0	0	0	0	Mouse	BALB/c mice (female, 6–8 weeks old) were taken from animal house of DRDE.
Immunology	8	Vaccine		Volume 37, Issue 1 Pages 1-210 (3 January 2019)	Immunization with attenuated non-transformable pneumococcal pep27 and comD mutant provides serotype-independent protection against pneumococcal infection	1	0	0	0	0	0	0	Mouse	A group of 10 CD1 (Orient Bio Inc., Korea) and SCID mice (Charles River Laboratories, Japan) were infected via intranasal (i.n.), intraperitoneal (i.p.), or intracerebroventricular (i.c.v.) routes with D39 or its isogenic Δpep27ΔcomD strain….Four-week-old mice (CD1, male) were purchased from Koatech
Immunology	12	Vaccine		Volume 37, Issue 1 Pages 1-210 (3 January 2019)	Humoral and cellular immune correlates of protection against bubonic plague by a live Yersinia pseudotuberculosis vaccine	0	1	0	0	0	0	0	Mouse	Seven-week-old female OF1, BALB/c and C57BL/6 (B6) mice were from Charles River France
Immunology	14	Vaccine		Volume 37, Issue 1 Pages 1-210 (3 January 2019)	Immunization with pneumococcal elongation factor Tu enhances serotype-independent protection against Streptococcus pneumoniae infection	1	0	0	0	0	0	0	Mouse	Male 6–8-week-old BALB/c mice (Nihon CLEA, Tokyo, Japan) were maintained under standard conditions in accordance with our institutional guidelines.
Immunology	17	Vaccine		Volume 37, Issue 2 Pages 211-400 (7 January 2019)	TcVac1 vaccine delivery by intradermal electroporation enhances vaccine induced immune protection against Trypanosoma cruzi infection in mice	0	1	0	0	0	0	0	Mouse	BALB/c female mice (6–8 weeks old, n = 48) were purchased from CINVESTAV, IPN, Mexico.
Immunology	1	J. Immunol	Immune Regulation	January 1, 2019 : Vol. 202, Issue 1: 1-308	Hippo Pathway Kinase Mst1 Is Required for Long-Lived Humoral Immunity	0	0	0	0	0	0	1	Mouse	Mst1 germline KO mice (11), Mst1 conditional KO mice (3), IL-21–GFP reporter mice (20), and Blimp1-GFP reporter mice (21) have been previously described….For immunization or infection, young mice at 7–8 wk of age were used unless otherwise indicated.
Immunology	2	J. Immunol	Immune Regulation	January 1, 2019 : Vol. 202, Issue 1: 1-308	RORγt Represses IL-10 Production in Th17 Cells To Maintain Their Pathogenicity in Inducing Intestinal Inflammation	0	0	0	0	0	0	1	Mouse	C57BL/6 and C57BL/6 Rag-1−/− mice were purchased from the Jackson Laboratory and maintained in the animal facilities of the University of Texas Medical Branch (UTMB).
Immunology	4	J. Immunol	Immune System Development	January 1, 2019 : Vol. 202, Issue 1: 1-308	Cesarean Section Induces Microbiota-Regulated Immune Disturbances in C57BL/6 Mice	0	0	0	0	0	0	1	Mouse	All conventional pups were weighed at the ages of 1, 2, 3, 4, and 8 wk. Because of practical limitations, germ-free and inoculated pups were only weighed at 8 wk of age. All mice were euthanized at 8 wk of age.
Immunology	6	J. Immunol	Innate Immunity and Inflammation	January 1, 2019 : Vol. 202, Issue 1: 1-308	CD62L Is a Functional and Phenotypic Marker for Circulating Innate Lymphoid Cell Precursors	0	0	1	0	0	0	0	Mouse	Ubq-GFP, Rag2−/−, or wild type (wt) C57/Bl6 mice (10–16 wk of age, both male and female) were kept under specific pathogen-free conditions
Immunology	7	J. Immunol	Innate Immunity and Inflammation	January 1, 2019 : Vol. 202, Issue 1: 1-308	LACC1 Regulates TNF and IL-17 in Mouse Models of Arthritis and Inflammation	0	0	0	0	0	0	1	Mouse	LACC1 KO mice were maintained at Genentech under specific pathogen-free conditions. All wildtype (WT) mice were generated from the same colony and age-matched for all experiments.
Immunology	9	J. Immunol	Mucosal Immunology	January 1, 2019 : Vol. 202, Issue 1: 1-308	Salmonella enterica Serovar Typhimurium Travels to Mesenteric Lymph Nodes Both with Host Cells and Autonomously	1	0	0	0	0	0	0	Mouse	C57BL/6 male mice were purchased from Envigo (Bicester, U.K.) and maintained in individually ventilated cages. CX3CR1+/GFP reporter mice (originally a gift from Steffen Jung) were bred and maintained under specific pathogen-free conditions at the Central Research Facility, University of Glasgow, U.K.
Immunology	10	J. Immunol	Systems Immunology	January 1, 2019 : Vol. 202, Issue 1: 1-308	Computational Analysis Supports IL-17A as a Central Driver of Neutrophil Extracellular Trap–Mediated Injury in Liver Ischemia Reperfusion	1	0	0	0	0	0	0	Mouse	Male wild-type (C57BL/6) mice (8–10 wk old) were purchased from The Jackson Laboratory.
Immunology	12	J. Immunol	Autoimmunity	January 15, 2019 : Vol. 202, Issue 2: 325-624	Deficiency of β-Arrestin 2 in Dendritic Cells Contributes to Autoimmune Diseases	0	1	0	0	0	0	0	Mouse	Eight- to twelve-week-old mice were used in experiments. C57BL/6 mice were purchased from Nanjing Biomedical Research Institute...SLE was induced in 16-wk-old female mice with single i.p. injection...
Immunology	14	J. Immunol	Immune Regulation	January 15, 2019 : Vol. 202, Issue 2: 325-624	Duox1 Regulates Primary B Cell Function under the Influence of IL-4 through BCR-Mediated Generation of Hydrogen Peroxide	0	0	0	0	0	0	1	Mouse	Mice between the ages of 8 and 12 wk were used for experiments
Immunology	15	J. Immunol	Infectious Disease and Houst Response	January 15, 2019 : Vol. 202, Issue 2: 325-624	Aging of Antiviral CD8+ Memory T Cells Fosters Increased Survival, Metabolic Adaptations, and Lymphoid Tissue Homing	1	0	0	0	0	1	0	Mouse	C57BL6/J (B6), congenic B6.CD90.1 (B6.PL-Thy1a/CyJ), and congenic B6.CD45.1 (B6.SJL-Ptprca Pepcb/BoyJ) mice were purchased from The Jackson Laboratory; We only used male mice in this study to avoid potential artifacts that may arise in gender mismatched adoptive transfer (AT) settings.
Immunology	17	J. Immunol	Infectious Disease and Houst Response	January 15, 2019 : Vol. 202, Issue 2: 325-624	Influenza A Virus Infection Induces Muscle Wasting via IL-6 Regulation of the E3 Ubiquitin Ligase Atrogin-1	1	0	0	0	0	0	0	Mouse	Adult male (12–16 wk) C57BL/6 wild-type mice were obtained from The Jackson Laboratory (Bar Harbor, ME). Age-matched male atrogin-1−/− and atrogin-1+/− mice as well as wild-type littermates (atrogin-1+/+) on a 129S/C57BL/6 background have been described previously
Immunology	18	J. Immunol	Mucosal Immunology	January 15, 2019 : Vol. 202, Issue 2: 325-624	IL-33 Induces Murine Intestinal Goblet Cell Differentiation Indirectly via Innate Lymphoid Cell IL-13 Secretion	0	0	1	0	0	0	0	Mouse	Male and female strain-matched mice were used and were age 6–12 wk at the start of the experiments.
Immunology	19	J. Immunol	Antigen Recognition and Response	February 1, 2019 : Vol. 202, Issue 3: 627-1015	Classical Type 1 Dendritic Cells Dominate Priming of Th1 Responses to Herpes Simplex Virus Type 1 Skin Infection	0	0	1	1	0	0	0	Mouse	All mice were female unless otherwise stated in the figure legend….n = 5 male mice, two independent experiments)
Immunology	20	J. Immunol	Autoimmunity	February 1, 2019 : Vol. 202, Issue 3: 627-1015	B Cell ADAM10 Controls Murine Lupus Progression through Regulation of the ICOS:ICOS Ligand Axis	0	0	0	0	0	0	1	Mouse	ADAM10-floxed mice crossed to the CD19-cre mouse were generated previously (20). Faslpr mice were purchased from The Jackson Laboratory (000482).
Immunology	8	Infection and Immunity	Host Response and Inflammation	January 2019; volume 87,issue 1	Yersinia pseudotuberculosis Exploits CD209 Receptors for Promoting Host Dissemination and Infection	0	0	0	0	0	0	1	Multiple species	C57BL/6, BALB/cJ, and LTβR-1 KO mice in the C57BL/6 background (25) were bred in the animal facility of UIC–College of Medicine
Immunology	16	Infection and Immunity	Host Response and Inflammation	February 2019; volume 87,issue 2	Antibodies to Protein but Not Glycolipid Structures Are Important for Host Defense against Mycoplasma pneumoniae	0	0	0	0	0	0	1	Multiple species	C57BL/6 mice were purchased from Charles River Laboratories and used at 8 to 12 weeks of age….Children with CAP and asymptomatic controls, admitted for a planned elective surgical procedure, from 3 to 18 years of age were enrolled from 1 May 2016 to 30 April 2017 during a CAP study at the University Children’s Hospital Zurich
Immunology	5	Immunity		January 15, 2019 Volume 50, Issue 1	Age-Related Loss of Innate Immune Antimicrobial Function of Dermal Fat Is Mediated by Transforming Growth Factor Beta	0	0	1	0	0	0	0	Multiple species	the backs of sex-matched and age-matched adult wild-type or indicated strain of mutant mice...skin biopsies were collected from C57BL/6 wild-type male mice with various ages...Fresh adult human (Caucasian) full thickness skin biopsies, from the back of healthy and non-obese male donors between
Immunology	7	Immunity		January 15, 2019 Volume 50, Issue 1	Disruption of Coronin 1 Signaling in T Cells Promotes Allograft Tolerance while Maintaining Anti-Pathogen Immunity	0	0	1	1	0	0	0	Multiple species	All cohorts were age- (8-16 weeks) and sex-matched and both males and females used for the studies...Human PBMCs were isolated from healthy volunteers (males, 25-35 years old) or the Coro1a−/− individual (male, 20 years old) described earlier
Immunology	10	Immunity		January 15, 2019 Volume 50, Issue 1	Intratumoral Tcf1+PD-1+CD8+ T Cells with Stem-like Properties Promote Tumor Control in Response to Vaccination and Checkpoint Blockade Immunotherapy	0	0	1	0	0	0	0	Multiple species	Tumor experiments used both male and female mice between 6 and 12 weeks of age. Donors and recipients of adoptive T cell transfers were sex matched.
Immunology	11	Immunity		January 15, 2019 Volume 50, Issue 1	Microbiotas from Humans with Inflammatory Bowel Disease Alter the Balance of Gut Th17 and RORγt+ Regulatory T Cells and Exacerbate Colitis in Mice	0	0	1	1	0	0	0	Multiple species	In total, 74 female and 79 male gnotobiotic C57BL/6 mice and 120 female and 147 male Rag1−/− mice were used in this study….Donor cells were sex-matched to recipients.
Immunology	17	Immunity		February 19, 2019, Volume 50, Issue 2	A Mutation in the Transcription Factor Foxp3 Drives T Helper 2 Effector Function in Regulatory T Cells	1	0	0	0	0	0	0	Multiple species	Age matched male mice were used within experiments, for sample size and age see corresponding figure legends….Male patient PBMCs
Immunology	19	Immunity		February 19, 2019, Volume 50, Issue 2	A Neutrophil Timer Coordinates Immune Defense and Vascular Protection	1	0	0	0	0	0	0	Multiple species	All experiments were performed in 7- to 18-week-old male C57BL/6 mice kept in a specific pathogen-free facility at Centro Nacional de Investigaciones Cardiovasculares...The study comprised blood from 12 healthy volunteers withdrawn at 12am, 4pm, 8pm, 12pm, 4am, and 8am.
Immunology	7	Vaccine		Volume 37, Issue 1 Pages 1-210 (3 January 2019)	Increasing FIM2/3 antigen-content improves efficacy of Bordetella pertussis vaccines in mice in vivo without altering vaccine-induced human reactogenicity biomarkers in vitro	0	1	0	0	0	0	0	Multiple species	In brief, female Balb/c mice were vaccinated at 4 and 7 weeks of age...Peripheral blood was collected from healthy adult volunteers, while human newborn cord blood was collected immediately after Cesarean section delivery of the placenta.
Immunology	8	J. Immunol	Innate Immunity and Inflammation	January 1, 2019 : Vol. 202, Issue 1: 1-308	The GTPase Rab1 Is Required for NLRP3 Inflammasome Activation and Inflammatory Lung Injury	0	0	1	1	0	0	0	Multiple species	C57BL/6J mice were acquired from The Jackson Laboratory (Bar Harbor, ME), housed in a specific pathogen-free barrier facility, and used in experiments at 12–16 wk of age…Ten patients meeting the sepsis-3 clinical criteria (15) and acute respiratory distress syndrome (16) were enrolled into the current study
Immunology	13	Infection and Immunity	Bacterial Infections	February 2019; volume 87,issue 2	Establishment, Validation, and Application of a New World Primate Model of Enterotoxigenic Escherichia coli Disease for Vaccine Development	0	0	1	1	0	0	0	Non-human primate	Fifty-five male and 54 female A. nancymaae animals, ranging in age from 11.4 to 73 months and in weight from 690 g to 1,890 g at study onset, were used in five separate studies.
Immunology	13	Immunity		January 15, 2019 Volume 50, Issue 1	Vaccine-Induced Protection from Homologous Tier 2 SHIV Challenge in Nonhuman Primates Depends on Serum-Neutralizing Antibody Titers	0	0	1	1	0	0	0	Non-human primate	Genotype and gender information for all animals is reported in Table S1.
Immunology	5	J. Immunol	Immunogenetics	January 1, 2019 : Vol. 202, Issue 1: 1-308	Characterization of Mauritian Cynomolgus Macaque FcγR Alleles Using Long-Read Sequencing	0	0	0	0	0	0	1	Non-human primate	PacBio sequencing was performed for 48 MCMs: 22 using whole blood samples and 26 using purified splenocytes or PBMCs. Sixteen of these animals were housed at the Wisconsin National Primate Research Center (WNPRC; Madison, WI), and 32 were housed by Bristol-Myers Squibb. Whole-genome sequencing (WGS) or whole-exome sequencing (macaque exome sequencing) was previously performed for the 16 WNPRC ani…
Immunology	9	Infection and Immunity	Microbial Immunity and Vaccines	January 2019; volume 87,issue 1	Granzyme B Is an Essential Mediator in CD8+ T Cell Killing of Theileria parva-Infected Cells	0	1	0	0	0	0	0	Other	Four Holstein-Friesian animals (animals 011, 592, 641, and 633) homozygous for the A10 or A18 MHC class I (MHC-I) haplotype were used for the study.
Immunology	11	Infection and Immunity	Molecular Genomics	January 2019; volume 87,issue 1	Genomic, Phenotypic, and Virulence Analysis ofStreptococcus sanguinis Oral and Infective-Endocarditis Isolates	0	0	0	0	0	0	1	Other	Specific-pathogen-free New Zealand White rabbits (2 to 4 kg; RSI Biotechnology) were utilized in the previously described endocarditis model (22, 23) to assess virulence. Prior to surgery, the rabbits were sedated and anesthetized.
Immunology	5	Vaccine		Volume 37, Issue 1 Pages 1-210 (3 January 2019)	The HSV-1 live attenuated VC2 vaccine provides protection against HSV-2 genital infection in the guinea pig model of genital herpes	0	1	0	0	0	0	0	Other	Female Hartley guinea pigs (251–300 or 301–350 g) were obtained from Charles River Breeding Laboratories
Immunology	17	Infection and Immunity	Fungal and Parasitic Infections	February 2019; volume 87,issue 2	Downregulation of the Central Noradrenergic System by Toxoplasma gondiiInfection	0	0	1	1	1	0	0	Rat and Mouse	Mice were housed five of the same sex per cage, with ad libitum access to food pellets and water...Rat samples were from Lister Hooded rats (Harlan UK Ltd.), males and females housed separately and provided food and water ad libitum,
					TOTALS:	10	12	37	21	10	2	21
Table Analyzed	Immunology Both Sexes				Table Analyzed	Immunology Analyses
P value and statistical significance					P value and statistical significance
Test	Chi-square				Test	Chi-square
Chi-square, df	16.76, 1				Chi-square, df	0.07802, 1
z	4.093				z	0.2793
P value	<0.0001				P value	0.78
P value summary	****				P value summary	ns
One- or two-sided	Two-sided				One- or two-sided	Two-sided
Statistically significant (P < 0.05)?	Yes				Statistically significant (P < 0.05)?	No
Data analyzed	Both Sexes	Single Sex or Unspecified	Total		Data analyzed	Analyzed By Sex	Did Not Analyze by Sex	Total
2009	13	67	80		2009	3	10	13
2019	37	43	80		2019	10	27	37
Total	50	110	160		Total	13	37	50
Percentage of row total	Both Sexes	Single Sex or Unspecified			Percentage of row total	Analyzed By Sex	Did Not Analyze by Sex
2009	16.25%	83.75%			2009	23.08%	76.92%
2019	46.25%	53.75%			2019	27.03%	72.97%
Percentage of column total	Both Sexes	Single Sex or Unspecified			Percentage of column total	Analyzed By Sex	Did Not Analyze by Sex
2009	26.00%	60.91%			2009	23.08%	27.03%
2019	74.00%	39.09%			2019	76.92%	72.97%

## Sheet: Neuroscience 
Discipline	Article #	Journal	Category	Date of issue	Article shorthand	Males	Females	Both	N of each sex provided	If both, data anylzed by sex?	Provide rationale for single sex use or analyses	Sex not specified	Mouse and Non-human primate	Method Excerpt
Neuroscience	6	J. Neurosci	Behavioral/Cognitive	January 02, 2019; Volume 39,Issue 1	The Social Brain Automatically Predicts Others' Future Mental States	0	0	1	1	0	0	0	Human	17 female, 11 male; age range 18–22, mean age = 19.6		Rat
Neuroscience	7	J. Neurosci	Behavioral/Cognitive	January 02, 2019; Volume 39,Issue 1	The Relationship between Age, Neural Differentiation, and Memory Performance	0	0	1	1	0	0	0	Human	Table 1: Sex (M/F) - Young Adults 12/12 Older Adults 12/12		Human
Neuroscience	8	J. Neurosci	Behavioral/Cognitive	January 02, 2019; Volume 39,Issue 1	Computing Value from Quality and Quantity in Human Decision-Making	0	0	1	1	0	0	0	Human	Forty-seven participants (25 males)		Mouse
Neuroscience	17	J. Neurosci	Behavioral/Cognitive	January 09, 2019; Volume 39,Issue 2	MDMA Increases Cooperation and Recruitment of Social Brain Areas When Playing Trustworthy Players in an Iterated Prisoner's Dilemma	1	0	0	0	0	0	0	Human	wenty-one male participants were recruited from the community.		Hampster
Neuroscience	18	J. Neurosci	Behavioral/Cognitive	January 09, 2019; Volume 39,Issue 2	Individual Differences in Dopamine Are Associated with Reward Discounting in Clinical Groups But Not in Healthy Adults	0	0	1	1	1	0	0	Human	Sample 1 included 25 healthy young adults (ages 18–24 years; mean ± SD, 20.9 ± 1.83 years; 13 females) recruited from the Vanderbilt University community in Nashville, TN between 2012 and 2013. Sample 2 included 84 healthy adults (ages 22–83 years; mean ± SD, 49.4 ± 17.6 years; 48 females) recruited from the Greater Nashville, TN metropolitan area between 2013 and 2016. Sample 3 included 35 healt…		Cat
Neuroscience	19	J. Neurosci	Neurobiology of Disease	January 09, 2019; Volume 39,Issue 2	Top-down and Bottom-up Regulated Auditory Phantom Perception	0	0	1	1	1	0	0	Human	A total of 72 participants (age: 40.96 ± 7.67 years; males: 48; females: 24)		Dog
Neuroscience	3	J. Comp. Neurol		February 1, 2019; Volume 527,Issue2	A logical relationship for schizophrenia, bipolar, and major depressive disorder. Part 4: Evidence from chromosome 4 high‐density association screen	0	0	1	1	0	0	0	Human	The initial 119 SCZ patients (SCZ119) were recruited from the inpatients department of Chang Le Mental Health Center. The average age and age of onset were 33.98 ± 11.99 and 27.65 ± 7.79, respectively, and the male/female ratio was 1.05:1 (61/58).		Sheep
Neuroscience	12	J. Comp. Neurol		February 1, 2019; Volume 527,Issue3	Distribution of cytochrome oxidase‐rich patches in human primary visual cortex	0	0	0	0	0	0	1	Human	We studied six cerebral hemispheres from individuals with ages varying from 21 to 64 year old		Non-human primate
Neuroscience	10	Neuroscience	Disease-Oriented Neuroscience	January 1, 2019; Volume 396	Does Seipin Play a Role in Oxidative Stress Protection and Peroxisome Biogenesis? New Insights from Human Brain Autopsies	0	0	1	1	1	0	0	Human	Thirteen post-mortem donors were selected, seven men and six women (aged 21–86 years), primarily deceased by suicide, traffic accident, or natural causes		Other
Neuroscience	12	Neuroscience	Behavioral and Cognitive	January 1, 2019; Volume 397	Bilateral Prefrontal Cortex Anodal tDCS Effects on Self-reported Aggressiveness in Imprisoned Violent Offenders	1	0	0	0	0	0	0	Human	Forty-one imprisoned male violent offenders (mean age = 36.2 ± 12.3 years, minimum age = 19 years), from two different prisons of the south of Spain (located in Córdoba and Huelva), participated voluntarily in the study.		Rat and Mouse
Neuroscience	14	Neuroscience	Disease-Oriented Neuroscience	January 1, 2019; Volume 397	Decreased Distance between Representation Sites of Distinct Facial Movements in Facial Synkinesis—A Task fMRI Study	0	0	1	1	0	0	0	Human	A total of 14 patients (1 male, 13 female) who presented with unilateral synkinesis…		Multiple species
Neuroscience	1	Nature Neurosci.		January 2019; Volume 22, Issue 1	Widespread RNA editing dysregulation in brains from autistic individuals	0	0	1	1	1	0	0	Human	We obtained RNA-seq data sets of three brain regions of ASD and control subjects from our previous study9.		Other
Neuroscience	6	Nature Neurosci.		January 2019; Volume 22, Issue 1	Human microglia regional heterogeneity and phenotypes determined by multiplexed single-cell mass cytometry	0	0	1	1	0	0	0	Human	Venous blood and lumbar CSF samples were obtained from four individuals...An overview of the donor information and postmortem variables is summarized in Supplementary Tables 1 and 4.
Neuroscience	9	Nature Neurosci.		January 2019; Volume 22, Issue 1	Efficient coding of subjective value	0	0	1	1	0	0	0	Human	The study tested healthy young volunteers (total n = 127, age 19–37 years, 55 females: n = 38 in experiment 1, 17 females; n = 37 new participants in experiment 2 (replication of results obtained in experiment 1), 14 females; n = 24 new participants in experiment 3, 11 females; and n = 28 new participants in experiment 4, 13 females).
Neuroscience	12	Nature Neurosci.		February 2019; Volume 22, Issue 2	Pathological priming causes developmental gene network heterochronicity in autistic subject-derived neurons	1	0	0	0	0	0	0	Human	IPSCs were generated from eight male subjects diagnosed with ASD according to the DSM-IV (average age 13.25 ± 5.67 years) and five male control participants (average age 11.4 ± 5.22 years)
Neuroscience	13	Nature Neurosci.		February 2019; Volume 22, Issue 2	Perceptual bias reveals slow-updating in autism and fast-forgetting in dyslexia	0	0	1	1	0	0	0	Human	Age, cognitive profile and discrimination performance of all (reported) participants of Experiment 3 are described in Supplementary Table 3.
Neuroscience	15	Nature Neurosci.		February 2019; Volume 22, Issue 2	Precise temporal memories are supported by the lateral entorhinal cortex in humans	0	0	1	1	0	0	0	Human	Data from the remaining 19 participants (10 female, ages 18–29 years (mean = 21.42, s.d. = 2.85)) were analyzed.
Neuroscience	16	Nature Neurosci.		February 2019; Volume 22, Issue 2	Human cognition involves the dynamic integration of neural activity and neuromodulatory systems	0	0	1	1	0	0	0	Human	For both the discovery and replication analyses, minimally preprocessed fMRI data were acquired from 100 unrelated participants (mean age 29.5 years, 55% female51)
Neuroscience	17	Nature Neurosci.		February 2019; Volume 22, Issue 3	Genome-wide meta-analysis of depression identifies 102 independent variants and highlights the importance of the prefrontal brain regions	0	0	1	1	1	0	0	Human	Sample sizes and the proportion of males and females of the depression cohorts used in the meta-analysis and the replication cohort
Neuroscience	18	Nature Neurosci.		February 2019; Volume 22, Issue 3	A genome-wide association study of shared risk across psychiatric disorders implicates gene regulation during fetal neurodevelopment	0	0	1	0	1	0	0	Human	iPSYCH samples from essentially the entire population of Denmark born between 1981 and 2005 (n = 1,472,762).
Neuroscience	1	J. Neurosci	Cellular/Molecular	January 02, 2019; Volume 39,Issue 1	Voltage-Independent SK-Channel Dysfunction Causes Neuronal Hyperexcitability in the Hippocampus of Fmr1 Knock-Out Mice	0	0	1	0	0	0	0	Mouse	In brief, both male and female 19–24-d-old mice were used.
Neuroscience	2	J. Neurosci	Cellular/Molecular	January 02, 2019; Volume 39,Issue 1	The Transcriptional Regulator SnoN Promotes the Proliferation of Cerebellar Granule Neuron Precursors in the Postnatal Mouse Brain	0	0	1	0	0	0	0	Mouse	Gender-matched male and female littermate mice were used for all experiments.
Neuroscience	3	J. Neurosci	Development/Plasticity/Repair	January 02, 2019; Volume 39,Issue 1	Glial Sulfatides and Neuronal Complex Gangliosides Are Functionally Interdependent in Maintaining Myelinating Axon Integrity	0	0	1	0	0	0	0	Mouse	For each study, mice of either sex were killed by rising CO2 inhalation; all experiments using mice were performed….
Neuroscience	5	J. Neurosci	Systems/Circuits	January 02, 2019; Volume 39,Issue 1	Four Unique Interneuron Populations Reside in Neocortical Layer 1	0	0	1	0	0	0	0	Mouse	Adult transgenic mice of either gender [postnatal day 21 (P21) to P53; mean age ± SEM = P30.3 ± 0.3] were killed using pentobarbital sodium and phenytoin sodium.
Neuroscience	9	J. Neurosci	Neurobiology of Disease	January 02, 2019; Volume 39,Issue 1	CTCF Governs the Identity and Migration of MGE-Derived Cortical Interneurons	0	0	1	0	0	1	0	Mouse	"Because we have detected no difference in phenotype between male and female animals in past or present study of this animal model, results from both sexes were combined."
Neuroscience	10	J. Neurosci	Cellular/Molecular	January 09, 2019; Volume 39,Issue 2	Dynamin 1 Restrains Vesicular Release to a Subquantal Mode In Mammalian Adrenal Chromaffin Cells	0	0	1	0	0	0	0	Mouse	To address this fundamental question in neurotransmission area using both sexes of animals...We used dyn1-KO mice on postnatal days 2 (P2) to P5
Neuroscience	11	J. Neurosci	Cellular/Molecular	January 09, 2019; Volume 39,Issue 2	Apo-Opsin Exists in Equilibrium Between a Predominant Inactive and a Rare Highly Active State	0	0	1	0	0	0	0	Mouse	Mice, both male and female, were kept in a 12:12 light/dark cycle
Neuroscience	13	J. Neurosci	Systems/Circuits	January 09, 2019; Volume 39,Issue 2	Thalamocortical and Intracortical Inputs Differentiate Layer-Specific Mouse Auditory Corticocollicular Neurons	0	0	1	0	0	0	0	Mouse	For injections of tracers, mice of either sex at 1–2 months of age were anesthetized….For auditory brainstem responses, BALB/c mice of either sex at ∼2 months of age
Neuroscience	14	J. Neurosci	Systems/Circuits	January 09, 2019; Volume 39,Issue 2	Auditory Thalamostriatal and Corticostriatal Pathways Convey Complementary Information about Sound Features	0	0	1	0	0	0	0	Mouse	Both sexes for Ephys experiments, males for anatomical
Neuroscience	15	J. Neurosci	Systems/Circuits	January 09, 2019; Volume 39,Issue 2	Layer 3 Dynamically Coordinates Columnar Activity According to Spatial Context	0	0	1	1	0	0	0	Mouse	Three male and two female transgenic mice expressing Channelrhodopsin-2 (ChR2) in a Cre recombinase-dependent manner (LSL-ChR2 mice; The Jackson Laboratory, 012569) were used for electrophysiological recordings. One male LSL-ChR2 mouse was used for NBQX validation of photo-identification methods. Three male mice expressing the fluorescent protein tdTomato in a Cre recombinase-dependent manner (Ai…
Neuroscience	20	J. Neurosci	Development/Plasticity/Repair	anuary 16, 2019; Volume 39,Issue 3	Dendritic Spines in Early Postnatal Fragile X Mice Are Insensitive to Novel Sensory Experience	0	0	1	0	0	0	0	Mouse	We used male and female C57BL/6J mice (HSD C57Bl/6NHsd) housed in a vivarium with a 12 h light-dark cycle and food and water ad libitum.
Neuroscience	4	J. Comp. Neurol		February 1, 2019; Volume 527,Issue2	Sex‐biased hippocampal pathology in the 5XFAD mouse model of Alzheimer's disease: A multi‐omic analysis	0	0	1	1	1	0	0	Mouse	Equal numbers of female and male subjects were included in each genotype at each time point (5 females and males for RNA, 3 females and males for protein, per genotype per age group) o eliminate variation due to the estrous cycle as a confounding factor in molecular experiments, samples were selected (both AD and WT), such that each experimental condition of mature females (i.e., 2‐month‐old 5XFA…
Neuroscience	5	J. Comp. Neurol		February 1, 2019; Volume 527,Issue3	Spatiotemporal distribution of glia in and around the developing mouse optic tract	0	0	1	0	0	1	0	Mouse	"In all experiments, male and female littermates were pooled together and analyzed as one group" E16, E18, and P0 mice
Neuroscience	10	J. Comp. Neurol		February 1, 2019; Volume 527,Issue3	Cell type specific tracing of the subcortical input to primary visual cortex from the basal forebrain	0	0	1	0	0	0	0	Mouse	Eighteen adult C57BL/6 mice of both sexes were used
Neuroscience	20	J. Comp. Neurol		February 1, 2019; Volume 527,Issue4	Ultrastructural and optogenetic dissection of V1 corticotectal terminal synaptic properties	0	0	1	0	0	0	0	Mouse	Experiments were carried out using mice, of either sex
Neuroscience	2	Neuroscience	Behavioral and Cognitive	January 1, 2019; Volume 396	Exploring the Dendritic Spine Pathology in a Schizophrenia-related Neurodevelopmental Animal Model	1	0	0	0	0	0	0	Mouse	Experiments focused on male subjects, females as mating pairs
Neuroscience	3	Neuroscience	Behavioral and Cognitive	January 1, 2019; Volume 396	Fluoxetine Modulates Spontaneous and Conditioned Behaviors to Carbon Dioxide (CO2) Inhalation and Alters Forebrain–Midbrain Neuronal Activation	1	0	0	0	0	0	0	Mouse	Male BALB/c mice were purchased from Envigo (Indianapolis, IN, USA) at age 8–9 weeks and group housed
Neuroscience	4	Neuroscience	Behavioral and Cognitive	January 1, 2019; Volume 396	The First Mating Experience Induces New Neurons in the Olfactory Bulb in Male Mice	0	0	1	1	0	0	0	Mouse	24 three-month-old males and 16 females of the C57BL strain from the Instituto de Neurobiología (INB), UNAM, local colony were used.
Neuroscience	7	Neuroscience	Cellular and Molecular	January 1, 2019; Volume 396	Direct Intracellular Signaling by the Carboxy terminus of NMDA Receptor GluN2 Subunits Regulates Dendritic Morphology in Hippocampal CA1 Pyramidal Neurons	0	0	1	1	1	0	0	Mouse	Male (n = 13) and female (n = 18) mice were bred in the Krasnow Institute Animal Facility
Neuroscience	8	Neuroscience	Cellular and Molecular	January 1, 2019; Volume 396	Electrophysiological Characterization of Novel Effects of the Uptake-2 Blocker Decynium-22 (D-22) on Dopaminergic Neurons in the Substantia Nigra Pars Compacta	0	0	0	0	0	0	1	Mouse	Following isoflurane anesthesia and decapitation, horizontal midbrain slices containing the SNc were cut with a vibratome or compresstome from 4-week-old CD-1 mice.
Neuroscience	17	Neuroscience	Disease-Oriented Neuroscience	January 1, 2019; Volume 398	Chronic Intermittent Hypoxia Induces Robust Astrogliosis in an Alzheimer’s Disease-Relevant Mouse Model	0	0	1	1	0	0	0	Mouse	Adult mice (10–11 months old) APPNLh/NLh × PS-1P264L/264L (APP/PS-1 KI) (Flood et al., 2002) (n = 16; 7 F and 9 M) a double gene-targeted knock-in mouse on a C57BL/6J background and C57BL/6J (n = 22; 10 F and 12 M, from Jackson) males and females were used in this experiment.
Neuroscience	4	Nature Neurosci.		January 2019; Volume 22, Issue 1	Tau impairs neural circuits, dominating amyloid-β effects, in Alzheimer models in vivo	0	0	1	0	0	0	0	Mouse	Male and female mice were used in the study and randomly allocated to the experiments.
Neuroscience	7	Nature Neurosci.		January 2019; Volume 22, Issue 1	GABA and glutamate neurons in the VTA regulate sleep and wakefulness	1	0	0	0	0	0	0	Mouse	All mice used in the experiments were male and aged 8 weeks at the start of the stereotaxic injections and experiments.
Neuroscience	10	Nature Neurosci.		February 2019; Volume 22, Issue 2	Loss of TREM2 function increases amyloid seeding but reduces plaque-associated ApoE	1	0	0	0	0	1	0	Mouse	Four-month-old male APPPS1 transgenic mice (Thy1-APP695KM670/671NL; Thy-1PS1L166P)24 and age-matched male C57BL6 littermate controls were used. Using male mice ensured reduced gender-dependent variability in plaque deposition24.
Neuroscience	11	Nature Neurosci.		February 2019; Volume 22, Issue 2	Active control of arousal by a locus coeruleus GABAergic circuit	0	0	1	0	0	0	0	Mouse	Adult mice (>2 months old) from a C57BL/6J background were used in this study. Male or female mice were randomly selected for each experiment.
Neuroscience	19	Nature Neurosci.		February 2019; Volume 22, Issue 3	Reduced mitochondrial fusion and Huntingtin levels contribute to impaired dendritic maturation and behavioral deficits in Fmr1-mutant mice	1	0	0	0	0	0	0	Mouse	The male offspring were used in experiments.
Neuroscience	20	Nature Neurosci.		February 2019; Volume 22, Issue 3	Neutrophil adhesion in brain capillaries reduces cortical blood flow and impairs memory function in Alzheimer’s disease mouse models	0	0	1	1	1	0	0	Mouse	Animals were of both sexes and ranged in age from 12 to 100 weeks.
Neuroscience	4	J. Neurosci	Systems/Circuits	January 02, 2019; Volume 39,Issue 1	Molecular Fingerprinting of On–Off Direction-Selective Retinal Ganglion Cells Across Species and Relevance to Primate Visual Circuits	0	0	1	0	0	0	0	Multiple species	Mice, pigmented adult rabbits, and macaque monkeys of both sexes were used for experiments
Neuroscience	17	J. Comp. Neurol		February 1, 2019; Volume 527,Issue4	Neural microvascular pericytes contribute to human adult neurogenesis	0	0	1	0	0	0	0	Multiple species	Healthy noncarious and carious permanent molar teeth from male and female donors aged 22–43 years were obtained. Prkdc scid mice (C.129S7[B6]‐Rag1tm1Mom/J, RRID:IMSR_JAX:003145) were imported from the Jackson Laboratory.
Neuroscience	19	J. Comp. Neurol		February 1, 2019; Volume 527,Issue4	Elongation of the CA1 field of the septal hippocampus in ungulates	0	0	1	0	0	0	0	Multiple species	We have studied the histology of the hippocampus in a range of 56 mammalian brains. Table 1 provides some info on sex.
Neuroscience	2	Nature Neurosci.		January 2019; Volume 22, Issue 1	Epigenome-wide study uncovers large-scale changes in histone acetylation driven by tau pathology in aging and Alzheimer’s human brains	0	0	1	0	0	0	0	Multiple species	All participants were enrolled in the Religious Orders Study (ROS)10 or the Memory and Aging Project (MAP)11. Adult (3 months old) female double-transgenic CK-p25 mice26 and their respective control littermates were used for the experiments.
Neuroscience	3	Nature Neurosci.		January 2019; Volume 22, Issue 1	A tau homeostasis signature is linked with the cellular and regional vulnerability of excitatory neurons to tau pathology	0	0	1	0	0	0	0	Multiple species	The F1 offspring (both males and females at 22 and 30+ months old, strain FVB/N:C57BL/6) were used as experimental animals. Human free-floating sections (40 µm) and formalin-fixed paraffin-embedded (FFPE) sections (10 µm) were provided by the Brain Bank at Banner Sun Health Research Institute.
Neuroscience	5	Nature Neurosci.		January 2019; Volume 22, Issue 1	TDP-43 extracted from frontotemporal lobar degeneration subject brains displays distinct aggregate assemblies and neurotoxic effects reflecting disease progression rates	0	0	1	0	0	0	0	Multiple species	Cortices were harvested from E18 (mouse embryonic day 18 of development) mouse embryos. Brains were donated to the Queen Square Brain Bank for Neurological disorders, Department of Movement Disorders, UCL Institute of Neurology, or the Department of Neurology, University of California San Diego, or the Netherlands Brain Bank, Netherlands Institute for Neuroscience
Neuroscience	6	J. Comp. Neurol		February 1, 2019; Volume 527,Issue3	Projections of three subcortical visual centers to marmoset lateral geniculate nucleus	0	0	1	1	0	0	0	Non-human primate	Data were obtained from two male and two female adult common marmosets (Callithrix jacchus)
Neuroscience	8	J. Comp. Neurol		February 1, 2019; Volume 527,Issue3	Unravelling the subcortical and retinal circuitry of the primate inferior pulvinar	0	0	1	1	0	0	0	Non-human primate	Nine adult New World marmoset monkeys (Callithrix jacchus) (see Table 1) Sex and n provided in table
Neuroscience	9	J. Comp. Neurol		February 1, 2019; Volume 527,Issue3	Cortical projections to the two retinotopic maps of primate pulvinar are distinct	0	0	0	0	0	0	1	Non-human primate	Four adult galagos (Otolemur garnettii) were used this study.
Neuroscience	11	J. Comp. Neurol		February 1, 2019; Volume 527,Issue3	Time course of cytochrome oxidase blob plasticity in the primary visual cortex of adult monkeys after retinal laser lesions	1	0	0	0	0	0	0	Non-human primate	Four adult male Sapajus apella (formerly Cebus apella) monkeys
Neuroscience	13	J. Comp. Neurol		February 1, 2019; Volume 527,Issue3	Architectonic features and relative locations of primary sensory and related areas of neocortex in mouse lemurs	1	0	0	0	0	0	0	Non-human primate	Cortical hemispheres from four adult mouse lemurs (M. murinus) were obtained
Neuroscience	14	J. Comp. Neurol		February 1, 2019; Volume 527,Issue3	Neuronal response properties across cytochrome oxidase stripes in primate V2	0	0	1	1	0	0	0	Non-human primate	Area V2 of three adult Sapajus apella monkeys were studied in terminal experiments lasting 24–72 hours. We studied one female (V202) and two males (V204 and V206) monkeys.
Neuroscience	15	J. Comp. Neurol		February 1, 2019; Volume 527,Issue3	Partitioning of the primate intraparietal cortex based on connectivity pattern and immunohistochemistry for Cat‐301 and SMI‐32	0	0	0	0	0	0	1	Non-human primate	Seven adult Sapajus apella monkeys ranging in weight from 2.8 to 4.0 kg were used in this study.
Neuroscience	16	J. Comp. Neurol		February 1, 2019; Volume 527,Issue3	Cortical connections of area 2 and posterior parietal area 5 in macaque monkeys	0	0	0	0	0	0	1	Non-human primate	One adult bonnet macaque monkey (Macaca radiata; Monkey C) and four adult rhesus macaque monkeys (Macaca mulatta) were used to study the cortical connections of posterior parietal area 5M and anterior parietal area 2
Neuroscience	14	Nature Neurosci.		February 2019; Volume 22, Issue 2	Cortical microcircuitry of performance monitoring	0	1	0	0	0	0	0	Non-human primate	Data were collected from two macaque monkeys (Eu, Macaca radiata, male, 8.8 kg, ~6 years old; X, Macaca mulatta, female, 6 kg, ~8 years old).
Neuroscience	2	J. Comp. Neurol		February 1, 2019; Volume 527,Issue2	The nucleus pretectalis principalis: A pretectal structure hidden in the mammalian thalamus	0	0	1	0	0	0	0	Other	A total of 18 Octodon degus weighing 180–220 g and including both males and females where used in this study.
Neuroscience	7	J. Comp. Neurol		February 1, 2019; Volume 527,Issue3	Morphological heterogeneity among corticogeniculate neurons in ferrets: quantification and comparison with a previous report in macaque monkeys	0	1	0	0	0	0	0	Other	Genetically modified rabies virus...was injected into the LGN of 6 adult female ferrets (Mustela putorius furo)
Neuroscience	12	J. Neurosci	Cellular/Molecular	January 09, 2019; Volume 39,Issue 2	Association of mGluR-Dependent LTD of Excitatory Synapses with Endocannabinoid-Dependent LTD of Inhibitory Synapses Leads to EPSP to Spike Potentiation in CA1 Pyramidal Neurons	0	0	1	0	0	0	0	Rat	xperiments were performed using Sprague Dawley rats of either sex.
Neuroscience	16	J. Neurosci	Behavioral/Cognitive	January 09, 2019; Volume 39,Issue 2	Neurochemical and Behavioral Dissections of Decision-Making in a Rodent Multistage Task	1	0	0	0	0	0	0	Rat	Male, Long–Evans rats (N = 100)
Neuroscience	1	J. Comp. Neurol		February 1, 2019; Volume 527,Issue2	Deep hypothermia reverses behavioral and histological alterations in a rat model of perinatal asphyxia	1	0	0	0	0	1	0	Rat	Pregnant dams, male pups used in experiment. "To avoid the influence of hormonal changes, only male rats were included in this study."
Neuroscience	18	J. Comp. Neurol		February 1, 2019; Volume 527,Issue4	Developmental expression of Neuregulin‐3 in the rat central nervous system	0	0	1	0	0	0	0	Rat	Rat embryos of day 17 or 18 were used to prepare primary cortical cultures, as described below. Both embryonic (E) and postnatal (P) rats were utilized for Western blotting, immunohistochemistry, and in situ hybridization experiments. Whole brain extracts were prepared for the developmental time course and positive controls from E18, P0, P3, P5, P7, P11, P14, P20, P28, and adult Sprague Dawley ra…
Neuroscience	1	Neuroscience	Behavioral and Cognitive	January 1, 2019; Volume 396	c-Fos, ΔFosB, BDNF, trkB and Arc Expression in the Limbic System of Male Roman High- and Low-Avoidance Rats that Show Differences in Sexual Behavior: Effect of Sexual Activity	1	0	0	0	0	0	0	Rat	Outbred male Roman High- (RHA) and low-avoidance (RLA) rats (n = 48), Ovariectomized Sprague–Dawley female rats (250–300 g)
Neuroscience	5	Neuroscience	Cellular and Molecular	January 1, 2019; Volume 396	Subregion-specific Protective Effects of Fluoxetine and Clozapine on Parvalbumin Expression in Medial Prefrontal Cortex of Chronically Isolated Rats	1	0	0	0	0	0	0	Rat	Thirty-six 2.5-month-old male Wistar rats (300–350 g) were used in this study.
Neuroscience	6	Neuroscience	Cellular and Molecular	January 1, 2019; Volume 396	Brain Sub/Region-Specific Effects of Olanzapine on c-Fos Expression of Chronically Socially Isolated Rats	1	0	0	0	0	0	0	Rat	Experiments were performed using adult male Wistar rats (2- to 3-month-old, body weight 300–400 g).
Neuroscience	9	Neuroscience	Disease-Oriented Neuroscience	January 1, 2019; Volume 396	Poly (lactide-co-glycolide) (PLGA) Scaffold Induces Short-term Nerve Regeneration and Functional Recovery Following Sciatic Nerve Transection in Rats	1	0	0	0	0	0	0	Rat	Seventy-two male Wistar rats, weighing 250 g from a local breeding colony (Universidade Federal do Rio Grande do Sul) were used.
Neuroscience	11	Neuroscience	Systems	January 1, 2019; Volume 396	Auditory Midbrain Hypoplasia and Dysmorphology after Prenatal Valproic Acid Exposure	1	0	0	0	0	1	0	Rat	At P21, litters were weaned and only male pups were included in the experiments described below as gender-specific effects of VPA exposure have been reported (Schneider et al., 2008).
Neuroscience	13	Neuroscience	Cellular and Molecular	January 1, 2019; Volume 397	Hemisphere-dependent Changes in mRNA Expression of GABAA Receptor Subunits and BDNF after Intra-prefrontal Cortex Allopregnanolone Infusion in Rats	1	0	0	0	0	0	0	Rat	Forty-two Wistar male rats (90–110 PND; 250–280 g), born and reared at the Animal House of Fundação Universidade Federal de Ciências da Saúde de Porto Alegre (UFCSPA), were housed in polypropylene cages..
Neuroscience	15	Neuroscience	Disease-Oriented Neuroscience	January 1, 2019; Volume 397	Mecp2 Disruption in Rats Causes Reshaping in Firing Activity and Patterns of Brainstem Respiratory Neurons	1	0	0	0	0	0	0	Rat	Animals used in the experiments were 1.5–2.5-month male rats.
Neuroscience	16	Neuroscience	Systems	January 1, 2019; Volume 397	Inhibitory Thoracic Interneurons are not Essential to Generate the Rostro-caudal Gradient of the Thoracic Inspiratory Motor Activity in Neonatal Rat	0	0	1	0	0	0	0	Rat	We used Wistar rats (n = 18), 0–2 days old.
Neuroscience	18	Neuroscience	Pain and Sensory	January 1, 2019; Volume 398	Systemic Morphine Produces Dose-dependent Nociceptor-mediated Biphasic Changes in Nociceptive Threshold and Neuroplasticity	1	0	0	0	0	0	0	Rat	Experiments were performed on 216 male Sprague–Dawley rats
Neuroscience	19	Neuroscience	Pain and Sensory	January 1, 2019; Volume 398	Diabetes-induced Neuropathic Mechanical Hyperalgesia Depends on P2X4 Receptor Activation in Dorsal Root Ganglia	1	0	0	0	0	0	0	Rat	Male Wistar rats (2-month-old, 200–250 g) obtained from the Multidisciplinary Center for Biological Research…
Neuroscience	20	Neuroscience	Pain and Sensory	January 1, 2019; Volume 398	Inhibition of Nerve Growth Factor Signaling Alleviates Repeated Dural Stimulation-induced Hyperalgesia in Rats	1	0	0	0	0	0	0	Rat	A total of 94 male adult Sprague–Dawley rats (250–300 g) were obtained from the Experimental Animal Center of Chongqing Medical University
Neuroscience	8	Nature Neurosci.		January 2019; Volume 22, Issue 1	Locus coeruleus activation enhances thalamic feature selectivity via norepinephrine regulation of intrathalamic circuit dynamics	0	1	0	0	0	0	0	Rat	Adult female Sprague–Dawley rats weighing between 225 and 300 g (Charles River Laboratories) were used.
					TOTALS:	22	3	50	24	9	5	5
Table Analyzed	Neuroscience Both Sexes				Table Analyzed	Neuroscience Analyses
P value and statistical significance					P value and statistical significance
Test	Chi-square				Test	Chi-square
Chi-square, df	18.37, 1				Chi-square, df	0.1421, 1
z	4.286				z	0.377
P value	<0.0001				P value	0.7062
P value summary	****				P value summary	ns
One- or two-sided	Two-sided				One- or two-sided	Two-sided
Statistically significant (P < 0.05)?	Yes				Statistically significant (P < 0.05)?	No
Data analyzed	Both Sexes	Single Sex or Unspecified	Total		Data analyzed	Analyzed By Sex	Did Not Analyze by Sex	Total
2009	23	57	80		2009	5	18	23
2019	50	30	80		2019	9	41	50
Total	73	87	160		Total	14	59	73
Percentage of row total	Both Sexes	Single Sex or Unspecified			Percentage of row total	Analyzed By Sex	Did Not Analyze by Sex
2009	28.75%	71.25%			2009	21.74%	78.26%
2019	62.50%	37.50%			2019	18.00%	82.00%
Percentage of column total	Both Sexes	Single Sex or Unspecified			Percentage of column total	Analyzed By Sex	Did Not Analyze by Sex
2009	31.51%	65.52%			2009	35.71%	30.51%
2019	68.49%	34.48%			2019	64.29%	69.49%

## Sheet: Pharmacology
Discipline	Article #	Journal	Category	Date of issue	Article shorthand	Males	Females	Both	N of each sex provided	If both, data anylzed by sex?	Provide rationale for single sex use or analyses	Sex not specified	Mouse and Non-human primate	Method Excerpt
Pharmacology	17	British J. Pharm		Volume 176, Issue 7, Pages: 815-981, April 2019	Aspirin eugenol ester attenuates oxidative injury of vascular endothelial cells by regulating NOS and Nrf2 signalling pathways	0	0	0	0	0	0	1	Hampster	The atherosclerosis model of Syrian golden hamsters was developed, and the treatments were prepared following the methods described in our previous studies…
Pharmacology	2	Neuropsychopharm		Volume 44 Issue 2, January 2019	Oxytocin reduces a chemosensory-induced stress bias in social perception	0	0	1	1	1	0	0	Human	We tested a total of 60 healthy, right-handed, heterosexual, non-smoking volunteers (30 females).	Human
Pharmacology	3	Neuropsychopharm		Volume 44 Issue 2, January 2019	A dose-finding study of oxytocin using neurophysiological measures of social processing	0	0	1	1	0	1	0	Human	Fifty-one stable outpatients with schizophrenia were recruited from the VA Greater Los Angeles…we did not have the power to examine for sex effects in the current design	Mouse
Pharmacology	5	Neuropsychopharm		Volume 44 Issue 2, January 2019	Low-dose intranasal oxytocin delivered with Breath Powered device modulates pupil diameter and amygdala activity: a randomized controlled pupillometry and fMRI study	1	0	0	0	0	0	0	Human	males aged 18 to 35 (inclusive) in good physical and mental health were eligible.	Cat
Pharmacology	13	Neuropsychopharm		Volume 44 Issue 2, January 2019	High-dose ondansetron reduces activation of interoceptive and sensorimotor brain regions	0	0	1	1	1	0	0	Human	Fifty-eight healthy volunteers passed medical screening and were recruited into the study over 30 months...Across the final sample, there were 25 females and 28 males
Pharmacology	14	J Psychopharm		Volume 33 Issue 2, February 2019	The Concise Health Risk Tracking-Self Report: Psychometrics within a placebo-controlled antidepressant trial among depressed outpatients	0	0	1	1	0	0	0	Human	he study included 296 participants aged 18–65 years with recurrent or chronic single episode MDD or dysthymia…
Pharmacology	15	J Psychopharm		Volume 33 Issue 2, February 2019	Subchronic treatment with St John’s wort produces a positive shift in emotional processing in healthy volunteers	0	0	1	1	0	0	0	Human	A total of 48 participants met criteria and agreed to take part in the study.
Pharmacology	16	J Psychopharm		Volume 33 Issue 2, February 2019	The selective orexin-2 receptor antagonist seltorexant improves sleep: An exploratory double-blind, placebo controlled, crossover study in antidepressant-treated major depressive disorder patients with persistent insomnia	0	0	1	1	0	0	0	Human	A total of 20 subjects were randomized of which 18 completed the study. Two subjects withdrew consent due to personal reasons during period 2 of the treatment phase. The mean age of the subjects was 43.0 years (range 20–67 years), with 40% being male.
Pharmacology	17	J Psychopharm		Volume 33 Issue 2, February 2019	No interaction between rivastigmine and citalopram on memory and novelty processing in healthy human volunteers	0	0	0	0	0	0	1	Human	A total of 18 subjects were included in the final study and analyses…
Pharmacology	18	J Psychopharm		Volume 33 Issue 2, February 2019	Temporal dynamics of the pharmacological MRI response to subanaesthetic ketamine in healthy volunteers: A simultaneous EEG/fMRI study	1	0	0	0	0	0	0	Human	In total, 30 healthy males were recruited as part of a larger study involving several simultaneous EEG/fMRI scan protocols
Pharmacology	20	J Psychopharm		Volume 33 Issue 3, March 2019	Effect of cannabis on weight and metabolism in first-episode non-affective psychosis: Results from a three-year longitudinal study	0	0	1	1	1	0	0	Human	A total of 510 patients were included in this study….Baseline sociodemographic and clinical characteristics.
Pharmacology	8	J Pharm Exp Ther	Metabolism, Transport, and Pharmacogenomics	January 01, 2019 : Vol. 368, Issue 1: 1-145	Comprehensive Evaluation of the Utility of 20 Endogenous Molecules as Biomarkers of OATP1B Inhibition Compared with Rosuvastatin and Coproporphyrin I	1	0	0	0	0	0	0	Human	Individual concentration-time data were obtained from a study reported previously in 12 healthy male subjects, all wild type for SLCO1B1 c.521T>C
Pharmacology	9	J Pharm Exp Ther	Metabolism, Transport, and Pharmacogenomics	January 01, 2019 : Vol. 368, Issue 1: 1-145	Evidence for the Validity of Pyridoxic Acid (PDA) as a Plasma-Based Endogenous Probe for OAT1 and OAT3 Function in Healthy Subjects	1	0	0	0	0	0	0	Human	This was an open-label, three-treatment, three-period, single-dose crossover study in 14 healthy, male, Indian, adult subjects under fasting conditions.
Pharmacology	7	Neuropsychopharm		Volume 44 Issue 2, January 2019	Opiate-associated contextual memory formation and retrieval are differentially modulated by dopamine D1 and D2 signaling in hippocampal–prefrontal connectivity	1	0	0	0	0	0	0	Mouse	Age-matched (8- to 9-week-old on arrival, weight 20-25 g) male C57BL/6J mice were housed in cages in groups of 3	Sheep
Pharmacology	8	Neuropsychopharm		Volume 44 Issue 2, January 2019	Ventral midbrain astrocytes display unique physiological features and sensitivity to dopamine D2 receptor signaling	0	0	1	1	1	1	0	Mouse	Aldh1L1-eGFP mice and GFAP-cre mice were maintained on FVB and C57Bl6 backgrounds, respectively; heterozygotes were used for all experiments….Male and female Aldh1L1-eGFP mice, aged 2–3 months, were anesthetized...we used males exclusively in these experiments to minimize possible variability resulting from sex differences	Non-human primate
Pharmacology	10	Neuropsychopharm		Volume 44 Issue 2, January 2019	Motivational changes that develop in a mouse model of inflammation-induced depression are independent of indoleamine 2,3 dioxygenase	0	0	1	0	0	0	0	Mouse	Male mice were used in studies of LPS treatment and female mice in studies of SNI. Our SNI findings parallel and extend those previously reported in male mice [12]. Besides a possible decreased activity of the neuroprotective branch of the kynurenine pathway in females, potentially making them more susceptible to IDO-dependent inflammation-induced depression [16], we did not expect an interaction…	Rat and Mouse
Pharmacology	15	Neuropsychopharm		Volume 44 Issue 2, January 2019	Metaplasticity contributes to memory formation in the hippocampus	1	0	0	0	0	0	0	Mouse	Male B6/129 F1 hybrid mice, 8–11 weeks old, weighing 20–35 g (Taconic) were used for drug microinfusion experiments.
Pharmacology	16	Neuropsychopharm		Volume 44 Issue 2, January 2019	Activity-dependent neuroprotective protein (ADNP) is an alcohol-responsive gene and negative regulator of alcohol consumption in female mice	0	0	1	1	1	0	0	Mouse	C57BL/6J mice (25–30 g) were housed 3–4/cage; Adnp+/+ and littermates, Adnp+/− mice (outbred with ICR strain for 30 generations in Tel-Aviv University Animal Facility; 25–30 g)…
Pharmacology	17	Neuropsychopharm		Volume 44 Issue 2, January 2019	Interneuronal δ-GABAA receptors regulate binge drinking and are necessary for the behavioral effects of early withdrawal	0	0	1	1	1	0	0	Mouse	Adult (>P60) male and female mice were housed at the Tufts University School of Medicine …
Pharmacology	19	Neuropsychopharm		Volume 44 Issue 2, January 2019	Chronic clozapine treatment restrains via HDAC2 the performance of mGlu2 receptor agonism in a rodent model of antipsychotic activity	0	0	1	1	0	0	0	Mouse	binding experiments were performed on adult (10–20 weeks old) male mice….GTPγS binding and behavior assays were performed on adult (10–20 weeks old) male and female mice
Pharmacology	3	J Psychopharm		Volume 33 Issue 1, January 2019	Diminished responses to monoaminergic antidepressants but not ketamine in a mouse model for neuropsychiatric lupus	1	0	0	0	0	0	0	Mouse	Male MRL/MpJ (control strain) and MRL/lpr mice (MRL/MpJ-Faslpr) (8–18 weeks old, Jackson Laboratories, USA) were used in the current study.
Pharmacology	4	J Psychopharm		Volume 33 Issue 1, January 2019	Anemoside A3 rapidly reverses depression-like behaviors and weakening of excitatory synaptic transmission in mouse models of depression	1	0	0	0	0	0	0	Mouse	Male C57BL/6J mice (8–10 weeks old), which were bred in the Laboratory Animal Center of Fujian Medical University, were housed under standard laboratory conditions
Pharmacology	7	J Psychopharm		Volume 33 Issue 1, January 2019	Chronic antipsychotic treatment targets GIRK current suppression, loss of long-term synaptic depression and behavioural sensitization in a mouse model of amphetamine psychosis	1	0	0	0	0	0	0	Mouse	Male homo- and heterozygous C57Bl6-D2eGFP mice as well as C57Bl6 mice (Charles River), between 6 and 12 weeks old, were used for experiments.
Pharmacology	9	J Psychopharm		Volume 33 Issue 1, January 2019	Amiloride modulation of carbon dioxide hypersensitivity and thermal nociceptive hypersensitivity induced by interference with early maternal environment Show all authors	0	0	1	1	1	0	0	Mouse	Swiss outbred mice (Harlan, Canada) were used in all experiments. Unless otherwise specified, all animals took part in only one of the different experiments outlined in this article, so that they were naive. To prevent a litter effect, there were no more than two animals/litter in the same experimental group...Control litters were collected daily and reintroduced to their home cage, and had their…
Pharmacology	11	J Psychopharm		Volume 33 Issue 1, January 2019	Effects of chronic caffeine consumption on sleep and the sleep electroencephalogram in mice	1	0	0	0	0	0	0	Mouse	Twelve-week-old male C57BL/6JOlaHsd mice (Harlan, Horst, The Netherlands) were used in this study. All mice were housed under controlled conditions
Pharmacology	13	J Psychopharm		Volume 33 Issue 1, January 2019	Fluoxetine exposure in adolescent and adult female mice decreases cocaine and sucrose preference later in life	0	1	0	0	0	0	0	Mouse	Female C57BL/6 mice were utilized in the current investigation
Pharmacology	4	J Pharm Exp Ther	Cellular and Molecular	January 01, 2019 : Vol. 368, Issue 1: 1-145	Pharmacological Inhibition of the Temperature-Sensitive and Ca2+-Permeable Transient Receptor Potential Vanilloid TRPV3 Channel by Natural Forsythoside B Attenuates Pruritus and Cytotoxicity of Keratinocytes	1	0	0	0	0	0	0	Mouse	C57BL/6 male mice aged 6–8 weeks were purchased from Vital River Laboratory Animal Technology Co. Ltd. (Beijing, China).
Pharmacology	5	J Pharm Exp Ther	Drug Discovery and Translational Medicine	January 01, 2019 : Vol. 368, Issue 1: 1-145	A Monoclonal Antibody against 6-Acetylmorphine Protects Female Mice Offspring from Adverse Behavioral Effects Induced by Prenatal Heroin Exposure	0	0	1	1	1	0	0	Mouse	Heroin-induced locomotor activity in adolescent mice prenatally exposed to saline (n = 8 males; n = 11 females), heroin (n = 8 males; n = 9 females), or mAb + heroin (n = 12 males; n = 14 females),
Pharmacology	7	J Pharm Exp Ther	Inflammation, Immunopharmacology, and Asthma	January 01, 2019 : Vol. 368, Issue 1: 1-145	Trypanosoma cruzi Neurotrophic Factor Facilitates Cardiac Repair in a Mouse Model of Chronic Chagas Disease	0	1	0	0	0	0	0	Mouse	Eight-week-old female C57BL/6J mice (Jackson Laboratory, Bar Harbor, ME) were infected with 1000–3000 parasites by intravenous tail vein injection.
Pharmacology	10	J Pharm Exp Ther	Neuropharmacology	January 01, 2019 : Vol. 368, Issue 1: 1-145	Methyleugenol Potentiates Central Amygdala GABAergic Inhibition and Reduces Anxiety	1	0	0	0	0	0	0	Mouse	All behavioral measurements were performed in adult, unrestrained, awake male C57BL/6J mice (8–12 weeks old), which were obtained from Shanghai Slac Laboratory Animal Company Limited
Pharmacology	11	J Pharm Exp Ther	Neuropharmacology	January 01, 2019 : Vol. 368, Issue 1: 1-145	Plasma and Brain Concentrations of Doxycycline after Single and Repeated Doses in Wild-Type and APP23 Mice	0	0	1	1	1	0	0	Mouse	Three groups of mice were used: 1) 7-week-old, male C57Bl/6 CRI mice (Charles River Laboratories Italia, Calco, Italy), 2) 20-month-old, female and male APP23 transgenic (Tg) mice, and 3) sex- and age-matched wild-type (WT) female and male littermates….No clear-cut differences were noted (data not shown), so the values for the two genders were combined.
Pharmacology	13	J Pharm Exp Ther	Behavioral Pharmacology	February 01, 2019 : Vol. 368, Issue 2: 146-325	Convulsant Effects of Abused Synthetic Cannabinoids JWH-018 and 5F-AB-PINACA Are Mediated by Agonist Actions at CB1 Receptors in Mice	1	0	0	0	0	0	0	Mouse	All studies used adult male National Institutes of Health-Swiss mice and were conducted in accordance with the Guide for Care and Use of Laboratory Animals
Pharmacology	15	J Pharm Exp Ther	Cardiovascular	February 01, 2019 : Vol. 368, Issue 2: 146-325	Protective Effects of Duloxetine against Cerebral Ischemia-Reperfusion Injury via Transient Receptor Potential Melastatin 2 Inhibition	1	0	0	0	0	0	0	Mouse	Male Trpm2 KO and littermate wild-type (WT) mice (C57BL/6J background, 6–9 weeks of age) were used in this study…
Pharmacology	19	J Pharm Exp Ther	Gastrointestinal, Hepatic, Pulmonary, and Renal	February 01, 2019 : Vol. 368, Issue 2: 146-325	Diuretic, Natriuretic, and Vasodepressor Activity of a Lipid Fraction Enhanced in Medium of Cultured Mouse Medullary Interstitial Cells by a Selective Fatty Acid Amide Hydrolase Inhibitor	0	0	1	0	0	0	0	Mouse	Male C57BL/6J mice (Jackson Laboratory, Bar Harbor, ME) and male and female homozygous FAAH+/+ wild-type (FAAH WT) and FAAH−/− knockout (FAAH KO) mice (2–5 months old)
Pharmacology	5	British J. Pharm		Volume 176, Issue3, February 2019	Ex vivo culture of cells derived from circulating tumour cell xenograft to support small cell lung cancer research and experimental therapeutics	0	1	0	0	0	0	0	Mouse	...mixture of RPMI and Matrigel (VWR, International Ltd, Lutterworth, UK), and 100–200 μL were injected s.c. into one or both flanks of 6‐ to 10‐week‐old female SCID‐bg mice (CB17.Cg‐PrkdcscidLystbg‐J/Crl, Harlan, Envigo Laboratories Ltd,
Pharmacology	7	British J. Pharm		Volume 176, Issue 5, Pages: 685-750, March 2019	Exogenous IL‐19 attenuates acute ischaemic injury and improves survival in male mice with myocardial infarction	1	0	0	0	0	0	0	Mouse	Male C57BL/6J mice (20–23 g, 10‐ to 12‐week old, RRID:IMSR_JAX:000664) were used in these experiments.
Pharmacology	9	British J. Pharm		Volume 176, Issue 5, Pages: 685-750, March 2019	Acute effects of zinc and insulin on arcuate anorexigenic proopiomelanocortin neurons	1	0	0	0	0	0	0	Mouse	The 7–9 weeks pathogen‐free male POMC‐hrGFP::LepR‐cre::td‐tomato (POMC‐hrGFP mice RRID: IMSR_JAX:006421; LepR‐cre mice RRID: IMSR_JAX:008320; td‐tomato mice RRID: IMSR_JAX:007908)…
Pharmacology	10	British J. Pharm		Volume 176, Issue 6, Pages: 751-813, March 2019	A novel nitroalkene‐α‐tocopherol analogue inhibits inflammation and ameliorates atherosclerosis in Apo E knockout mice	0	1	0		0	0	0	Mouse	The female Apo E knockout mice (C57BL/6J; Jackson Laboratory, Bar Harbor, Maine, USA) used were 8 to 10 weeks old and weighed 18–22 g.
Pharmacology	14	British J. Pharm		Volume 176, Issue 7, Pages: 815-981, April 2019	Betulinic acid alleviates endoplasmic reticulum stress‐mediated nonalcoholic fatty liver disease through activation of farnesoid X receptors in mice	0	1	0	0	0	1	0	Mouse	Because female mice are known to have a higher expression of retinoic X receptors and higher sensitivity to FXR agonists than males (Kosters et al., 2013), we focused on females in this study. Six‐week‐old female C57BL/6J mice (RRID:IMSR_JAX:000664) were introduced from Jackson Labs by SLAC Laboratory (Shanghai, China), and six‐week‐old female FXR−/− B6.129×1 mice
Pharmacology	16	British J. Pharm		Volume 176, Issue 7, Pages: 815-981, April 2019	Opposite effects of cannabinoid CB1 and CB2 receptors on antipsychotic clozapine‐induced cardiotoxicity	1	0	0	0	0	0	0	Mouse	The experiments were performed using male BALB/cByJSlac mice (~6 weeks old, MGI: 6272006), which were introduced from the Jackson Laboratory
Pharmacology	19	British J. Pharm		Volume 176, Issue 7, Pages: 815-981, April 2019	Blockage of sphingosine‐1‐phosphate receptor 2 attenuates allergic asthma in mice	0	1	0	0	0	0	0	Mouse	Three S1P2 heterozygous mice were kindly provided by Richard Proia at NIH (Kono et al., 2007). They were of mixed C57BL/6 (RRID:IMSR_JAX:00664) and 129Sv (RRID:IMSR_APB:4898) background.6‐week‐old female WT Balb/c mice were randomly assigned to one of five treatment groups (n = 6)...
Pharmacology	20	British J. Pharm		Volume 176, Issue 7, Pages: 815-981, April 2019	Inhibition of Cav3.2 calcium channels: A new target for colonic hypersensitivity associated with low‐grade inflammation	1	0	0	0	0	0	0	Mouse	Eight‐week‐old male C57BL/6j mice purchased from Janvier Laboratories (Le Genest‐Saint‐Isle, France, RRID:IMSR_JAX:000664), eight‐week‐old C57BL/6j Cav3.2 knockout (KO) male mice originally…
Pharmacology	9	Neuropsychopharm		Volume 44 Issue 2, January 2019	Neural cell adhesion molecule peptide mimetics modulate emotionality: pharmacokinetic and behavioral studies in rats and non-human primates	1	0	0	0	0	0	0	Multiple species	A total of 178 adult male Sprague-Dawley rats (Rattus norvegicus) and 6 adult male squirrel monkeys (Saimiri sciureus) served as subjects.	Other
Pharmacology	2	J Psychopharm		Volume 33 Issue 1, January 2019	Mouse, rat, and dog bioavailability and mouse oral antidepressant efficacy of (2R,6R)-hydroxynorketamine	0	0	1	1	0	0	0	Multiple species	Male and female CD-1 mice...Male Sprague-Dawley rats...Adult male purebred beagle dogs
Pharmacology	12	British J. Pharm		Volume 176, Issue 6, Pages: 751-813, March 2019	Epigenetic events involved in organic cation transporter 1‐dependent impaired response of hepatocellular carcinoma to sorafenib	0	0	1	1	0	0	0	Multiple species	Information regarding age, gender, tumour stage and underlying diseases of these patients is included in Supporting Information Table S1….Male Wistar rats (150–180 g) were obtained from the University of Salamanca Animal House (RGD Cat# 13508588, RRID:RGD_13 508 588), whereas 8‐week‐old female immunodeficient nude mice (Swiss nu/nu) were purchased from Charles River Laboratories (Barcelona)
Pharmacology	15	British J. Pharm		Volume 176, Issue 7, Pages: 815-981, April 2019	Pharmacological impact of antiretroviral therapy on platelet function to investigate human immunodeficiency virus‐associated cardiovascular risk	0	0	1	0	0	0	0	Multiple species	Volunteers, male and female, had not taken aspirin, steroids, antihistamines…Three‐month‐old wild‐type male C57BL/6 mice (MGI Cat# 5654507, RRID:MGI:5654507) weighing 20–25 g were supplied by Harlan (Bicester, UK). For experiments investigating the effect of TAF, 3‐month‐old male and female carboxyesterase1‐deficient (Ces1c−/−) mice
Pharmacology	20	Neuropsychopharm		Volume 44 Issue 3, February 2019		0	1	0	0	0	0	0	Non-human primate	Adult female rhesus macaques (Macaca mulatta) weighing 7–14 kg (N = 10) served as subjects.
Pharmacology	2	J Pharm Exp Ther	Behavioral Pharmacology	January 01, 2019 : Vol. 368, Issue 1: 1-145	Long-Lasting Effects of Methocinnamox on Opioid Self-Administration in Rhesus Monkeys	0	0	1	1	0	0	0	Non-human primate	Thirteen adult rhesus monkeys (10 males [AC, AP, DU, FI, GI, LO, MA, MO, TI, and WI] and three females [NI, PR, and RU]),…
Pharmacology	14	J Pharm Exp Ther	Behavioral Pharmacology	February 01, 2019 : Vol. 368, Issue 2: 146-325	Reversal and Prevention of the Respiratory-Depressant Effects of Heroin by the Novel μ-Opioid Receptor Antagonist Methocinnamox in Rhesus Monkeys	0	0	1	1	0	0	0	Non-human primate	Five adult rhesus monkeys (four female, identified here as ME, OL, SC, and CE; one male, GI) participated in this study.
Pharmacology	8	British J. Pharm		Volume 176, Issue 5, Pages: 685-750, March 2019	The combination of metformin and 2‐deoxyglucose significantly inhibits cyst formation in miniature pigs with polycystic kidney disease	0	0	0	0	0	0	1	Other	A miniature pig ADPKD model was successfully constructed by inducible deletion of the PKD1 gene, which was achieved using zinc finger nucleases, a novel genomic editing technique (He et al., 2015)…
Pharmacology	1	Neuropsychopharm		Volume 44 Issue 2, January 2019	Exposure to conditions of uncertainty promotes the pursuit of amphetamine	1	0	0	0	0	0	0	Rat	Male Long–Evans rats weighing 250–275 g on arrival from Harlan Teklad	Rat
Pharmacology	4	Neuropsychopharm		Volume 44 Issue 2, January 2019	Oxytocin attenuates phencyclidine hyperactivity and increases social interaction and nucleus accumben dopamine release in rats	1	0	0	0	0	0	0	Rat	Fifty-six male Lister-hooded rats (150–200 g; Charles River UK) were housed in groups…	Hampster
Pharmacology	11	Neuropsychopharm		Volume 44 Issue 2, January 2019	Chemogenetic activation of ventral tegmental area GABA neurons, but not mesoaccumbal GABA terminals, disrupts responding to reward-predictive cues	1	0	0	0	0	0	0	Rat	Long-Evans rats (Envigo, Indianapolis, IN) weighing ~290–320 g were individually housed under a 12 h/12 h light/dark cycle…Male Sprague Dawley rats (200–300 g) were used for electrophysiological experiments.	Multiple species
Pharmacology	12	Neuropsychopharm		Volume 44 Issue 2, January 2019	Dopamine in the oval bed nucleus of the stria terminalis contributes to compulsive responding for sucrose in rats	1	0	0	0	0	0	0	Rat	Two hundred and twenty-six male Long–Evans rats (Charles River Laboratories) were paired housed …	Other
Pharmacology	14	Neuropsychopharm		Volume 44 Issue 2, January 2019	Disrupting reconsolidation: memory erasure or blunting of emotional/motivational value?	1	0	0	0	0	0	0	Rat	Male Sprague-Dawley rats were used in all experiments
Pharmacology	18	Neuropsychopharm		Volume 44 Issue 2, January 2019	The olfactory bulb is a source of high-frequency oscillations (130–180 Hz) associated with a subanesthetic dose of ketamine in rodents	1	0	0	0	0	0	0	Rat	Twenty male Wistar rats (250–350 g) were used in this study.
Pharmacology	1	J Psychopharm		Volume 33 Issue 1, January 2019	Serotonin actions within the prelimbic cortex induce anxiolysis mediated by serotonin 1a receptors	1	0	0	0	0	0	0	Rat	Adult male Wistar rats weighing 230–250 g (n=212) were housed in groups of five under a 12:12 h light/dark cycle (lights on at 07:00) at 22±1°C and given access to food
Pharmacology	5	J Psychopharm		Volume 33 Issue 1, January 2019	The endogenous opioid system modulates defensive behavior evoked by Crotalus durissus terrificus: Panicolytic-like effect of intracollicular non-selective opioid receptors blockade	1	0	0	0	0	0	0	Rat	Specific germ-free male Wistar rats (Rattus norvegicus, Rodentia, Muridae), weighing 200–250 g (n=6–12 per treatment group; N=73),
Pharmacology	6	J Psychopharm		Volume 33 Issue 1, January 2019	Procognitive effects of varenicline in the animal model of schizophrenia depend on α4β2- and α7-nicotinic acetylcholine receptors	1	0	0	0	0	0	0	Rat	Male Sprague-Dawley rats (Charles River, Sulzfeld, Germany) weighing 350–400 g on arrival were housed in a temperature-controlled (21±1°C) and humidity-controlled…
Pharmacology	8	J Psychopharm		Volume 33 Issue 1, January 2019	Reinforcement attenuation as a behavioral technique to suppress conditioned avoidance response in rats: A comparative study with olanzapine	1	0	0	0	0	0	0	Rat	Adult male Sprague–Dawley rats (226–250 g upon arrival, Charles River, Portage, MI, USA) were housed two per cage, in transparent polycarbonate cages…
Pharmacology	10	J Psychopharm		Volume 33 Issue 1, January 2019	Chronic methylphenidate treatment during adolescence has long-term effects on monoaminergic function	1	0	0	0	0	0	0	Rat	Male Sprague-Dawley rats were purchased from Charles River, UK. Animals were housed in groups of 2–4 per cage…
Pharmacology	12	J Psychopharm		Volume 33 Issue 1, January 2019	Effects of adolescent caffeine consumption on cocaine self-administration and reinstatement of cocaine seeking	1	0	0	0	0	0	0	Rat	Male Sprague-Dawley rats (Envigo, Indianapolis, Indiana, USA) were received on either postnatal day (P) 23 or P60
Pharmacology	19	J Psychopharm		Volume 33 Issue 2, February 2019	Perinatal exposure to fluoxetine increases anxiety- and depressive-like behaviours and alters glutamatergic markers in the prefrontal cortex and hippocampus of male adolescent rats: A comparison between Sprague-Dawley rats and the Wistar-Kyoto rat model of depression	1	0	0	0	0	0	0	Rat	Male and female SD and WKY rats (12 weeks of age) were obtained from the Animal Resource Centre, Western Australia….Male offspring were the initial focus of this study, given the increased prevalence in males for neurodevelopmental disorders such as autism (4:1) and ADHD (2.3:1),
Pharmacology	1	J Pharm Exp Ther	Behavioral Pharmacology	January 01, 2019 : Vol. 368, Issue 1: 1-145	The 5-HT2A Receptor (5-HT2AR) Regulates Impulsive Action and Cocaine Cue Reactivity in Male Sprague-Dawley Rats	1	0	0	0	0	0	0	Rat	Male Sprague-Dawley rats (n = 160; Harlan, Houston, TX) weighed 250–275 g at arrival and were housed in the colony room.
Pharmacology	3	J Pharm Exp Ther	Cardiovascular	January 01, 2019 : Vol. 368, Issue 1: 1-145	Inhibition of Advanced Glycation End Products Formation Attenuates Cardiac Electrical and Mechanical Remodeling and Vulnerability to Tachyarrhythmias in Diabetic Rats	1	0	0	0	0	0	0	Rat	Male Sprague–Dawley rats (BioLASCO Co., Taipei, Taiwan) weighing 190–220 g, aged 6 weeks, received a single tail vein injection of STZ (65 mg/kg).
Pharmacology	6	J Pharm Exp Ther	Gastrointestinal, Hepatic, Pulmonary, and Renal	January 01, 2019 : Vol. 368, Issue 1: 1-145	A Comparison of the Central versus Peripheral Gastrointestinal Prokinetic Activity of Two Novel Ghrelin Mimetics	1	0	0	0	0	0	0	Rat	Experiments were performed on male Sprague-Dawley rats (250–350 g) purchased from Charles River Laboratories (Wilmington, MA).
Pharmacology	12	J Pharm Exp Ther	Neuropharmacology	January 01, 2019 : Vol. 368, Issue 1: 1-145	Prostanoid EP4 Receptor-Mediated Augmentation of Ih Currents in Aβ Dorsal Root Ganglion Neurons Underlies Neuropathic Pain	1	0	0	0	0	0	0	Rat	All adult male Sprague-Dawley rats, weighing 180–220 g, were obtained from Japan SLC Inc. (Hamamatsu, Japan).
Pharmacology	17	J Pharm Exp Ther	Endocrine and Diabetes	February 01, 2019 : Vol. 368, Issue 2: 146-325	Estrogen-Dependent Disruption of Adiponectin-Connexin43 Signaling Underlies Exacerbated Myocardial Dysfunction in Diabetic Female Rats	0	0	1	1	1	0	0	Rat	Young (8 weeks of age) female and male Wistar rats (170–200 g; Charles River Laboratories, Raleigh, NC) were kept…
Pharmacology	18	J Pharm Exp Ther	Endocrine and Diabetes	February 01, 2019 : Vol. 368, Issue 2: 146-325	α-Tocopherol Potentiates the Cervical Resistance Decreasing Effects of COX Inhibitors in Pregnant Rats: The Putative Role of Cyclooxygenase-2 Inhibition	0	1	0	0	0	0	0	Rat	Sprague-Dawley (SD) rats were purchased from INNOVO Ltd. (Gödöllő, Hungary)
Pharmacology	20	J Pharm Exp Ther	Inflammation, Immunopharmacology, and Asthma	February 01, 2019 : Vol. 368, Issue 2: 146-325	Dihydromyricetin Inhibits Inflammation of Fibroblast-Like Synoviocytes through Regulation of Nuclear Factor-κB Signaling in Rats with Collagen-Induced Arthritis	1	0	0	0	0	0	0	Rat	Male Wistar rats, aged 7 to 8 weeks, were used in the experiments and housed in specific-pathogen-free facilities in pathogen-free conditions
Pharmacology	1	British J. Pharm		Volume 176, Issue3, February 2019	Anti‐hyperlipidaemic effects of synthetic analogues of nordihydroguaiaretic acid in dyslipidaemic rats	1	0	0	0	0	0	0	Rat	Male Sprague–Dawley rats (175–200 g) obtained from Harlan (Indianapolis, IN) were used in these studies.
Pharmacology	2	British J. Pharm		Volume 176, Issue3, February 2019	Different mechanisms involved in liraglutide and glucagon‐like peptide‐1 vasodilatation in rat mesenteric small arteries	1	0	0	0	0	0	0	Rat	Adult male Wistar rats (10–12 weeks old) of the Hannover strain (RGD Cat# 1566433, RRID:RGD_1566433) and weighing 300–350 g were obtained from either Taconic, Ry, Denmark, or Janvier Laboratories, France.
Pharmacology	3	British J. Pharm		Volume 176, Issue3, February 2019	Mitochondrial protective effect of neferine through the modulation of nuclear factor erythroid 2‐related factor 2 signalling in ischaemic stroke	1	0	0	0	0	0	0	Rat	Adult male Sprague–Dawley rats weighing 240–270 g were obtained from the National Institute for Food and Drug Control
Pharmacology	4	British J. Pharm		Volume 176, Issue3, February 2019	Sirtuin 1 represses PKC‐ζ activity through regulating interplay of acetylation and phosphorylation in cardiac hypertrophy	1	0	0	0	0	0	0	Rat	Sprague Dawley (SD) rats (male, weighing 200–220 g, specific pathogen free (SPF) grade, certification no. 44005800004147)
Pharmacology	6	British J. Pharm		Volume 176, Issue3, February 2019	Hypoglycaemic effects of glimepiride in sulfonylurea receptor 1 deficient rat	1	0	0	0	0	0	0	Rat	All rats studied were male with a weight of 120–140 g at the beginning of the experiments.
Pharmacology	11	British J. Pharm		Volume 176, Issue 6, Pages: 751-813, March 2019	Activation of RyR2 by class I kinase inhibitors	1	0	0	0	0	0	0	Rat	This study used 2‐ to 3‐month‐old (~250 g) specific pathogen‐free male Sprague–Dawley rats,
Pharmacology	13	British J. Pharm		Volume 176, Issue 6, Pages: 751-813, March 2019	Modulation of α‐adrenoceptor signalling protects photoreceptors after retinal detachment by inhibiting oxidative stress and inflammation	1	0	0	0	0	0	0	Rat	RD was induced in the left eyes with the right eyes serving as attached controls in adult male rats (8–10 weeks; 180–250 g), as described previously
Pharmacology	6	Neuropsychopharm		Volume 44 Issue 2, January 2019	Isoform-selective phosphoinositide 3-kinase inhibition ameliorates a broad range of fragile X syndrome-associated deficits in a mouse model	0	0	1	1	1	0	0	Rat and Mouse	Fmr1KO mice maintained on a C57BL/6 background and C57BL/6 wild-type (WT) mice were obtained from The Jackson Laboratory (Bar Harbor, ME, USA). Sprague–Dawley rats and Crl:CD-1-Foxn1 mice for pharmacokinetic studies were obtained from Charles River Laboratories...Experiments were performed using male mice, except of e, for which male and female mice were used. No differences in seizure susceptibi…	Dog
Pharmacology	16	J Pharm Exp Ther	Drug Discovery and Translational Medicine	February 01, 2019 : Vol. 368, Issue 2: 146-325	A Fentanyl Vaccine Alters Fentanyl Distribution and Protects against Fentanyl-Induced Effects in Mice and Rats	1	0	0	0	0	0	0	Rat and Mouse	Male Holtzman rats (Envigo) weighing 200–225 g were double housed with a standard 12-hour light/dark cycle….Male Sprague-Dawley rats (Envigo) weighing 200–225 g...Male BALB/c mice (Envigo, Madison, WI), 5 to 6 weeks old, were housed in groups of four under a standard 12-hour light/dark cycle.
Pharmacology	18	British J. Pharm		Volume 176, Issue 7, Pages: 815-981, April 2019	Potent effects of dioscin against hepatocellular carcinoma through regulating TP53‐induced glycolysis and apoptosis regulator (TIGAR)‐mediated apoptosis, autophagy, and DNA damage	1	0	0	0	0	0	0	Rat and Mouse	Male Wistar rats (RRID: RGD_10044) weighing 120–150 g and 4‐week‐old BALB/c nude mice (RRID: MGI: 5649767) weighing 18–22 g were provided by the...Xenograft models in nude mice were established on male BALB/c nude mice.
					TOTAL	46	8	23	20	11	3	3
Table Analyzed	Pharmacology Both Sexes				Table Analyzed	Pharmacology Analyses
P value and statistical significance					P value and statistical significance
Test	Chi-square				Test	Chi-square
Chi-square, df	0.2648, 1				Chi-square, df	4.538, 1
z	0.5145				z	2.13
P value	0.6069				P value	0.0332
P value summary	ns				P value summary	*
One- or two-sided	Two-sided				One- or two-sided	Two-sided
Statistically significant (P < 0.05)?	No				Statistically significant (P < 0.05)?	Yes
Data analyzed	Analyzed By Sex	Single Sex or Unspecified	Total		Data analyzed	Analyzed By Sex	Did Not Analyze by Sex	Total
2009	26	54	80		2009	5	21	26
2019	23	57	80		2019	11	12	23
Total	49	111	160		Total	16	33	49
Percentage of row total	Analyzed By Sex	Single Sex or Unspecified			Percentage of row total	Analyzed By Sex	Did Not Analyze by Sex
2009	32.50%	67.50%			2009	19.23%	80.77%
2019	28.75%	71.25%			2019	47.83%	52.17%
Percentage of column total	Analyzed By Sex	Single Sex or Unspecified			Percentage of column total	Analyzed By Sex	Did Not Analyze by Sex
2009	53.06%	48.65%			2009	31.25%	63.64%
2019	46.94%	51.35%			2019	68.75%	36.36%

## Sheet: Endocrinology
Discipline	Article #	Journal	Category	Date of issue	Article shorthand	Males	Females	Both	N of each sex provided	If both, data anylzed by sex?	Provide rationale for single sex use or analyses	Sex not specified	Mouse and Non-human primate	Method Excerpt
Endocrinology	12	J. Neuroendo		Volume 31, Issue 4, April 2019	Kisspeptin and RFRP3 modulate body mass in Phodopus sungorus via two different neuroendocrine pathways	0	0	1	1	1	0	0	Hampster	Post‐pubertal (aged 3‐4 months at the beginning of experiments) male (n = 72) and female (n = 63) Djungarian hamsters were used.
Endocrinology	2	AJP Endo Metab		Volume 316, Issue 1, January 2019	Growth hormone acts along the PPARγ-FSP27 axis to stimulate lipolysis in human adipocytes	1	0	0	0	0	0	0	Human	Eight healthy young men (body mass index 22.5 ± 1.5 kg/m2) in the age range 19–23 yr were studied in a single blind randomized crossover design.
Endocrinology	15	AJP Endo Metab	Mitochondria Dysfunction in Aging and Metabolic Diseases	Volume 316, Issue 2, February 2019	Oxidative modifications of mitochondrial complex II are associated with insulin resistance of visceral fat in obesity	0	0	1	1	1	0	0	Human	Consecutive subjects with severe long-standing obesity (obesity > 10 yr; n = 43; body mass index ≥ 35 kg/m2, age ≥ 18 yr), enrolled in the Boston Medical Center Bariatric Surgery …In all experiments outlined below samples from both sexes were used, and on detailed analyses there were no significant differences between sexes in any parameters tested.
Endocrinology	17	AJP Endo Metab	Translational Physiology	Volume 316, Issue 2, February 2019	Short-term low-calorie diet remodels skeletal muscle lipid profile and metabolic gene expression in obese adults	0	0	1	1	0	1	0	Human	Eight obese nondiabetic participants (two men and six women) were recruited to enroll in a cohort study…Six of the eight participants were women and consequently the study was not designed to assess the effects of sex on the metabolic response to dietary intervention.
Endocrinology	18	AJP Endo Metab	Translational Physiology	Volume 316, Issue 2, February 2019	Youth with type 2 diabetes have hepatic, peripheral, and adipose insulin resistance	0	0	1	1	0	0	0	Human	Adolescents with and without T2D were recruited from pediatric clinics at the Children’s Hospital Colorado…Twenty-seven youth with T2D [age: 15.6 ± 0.4 yr; female: 78%; body mass index (BMI) percentile
Endocrinology	19	AJP Endo Metab	Translational Physiology	Volume 316, Issue 2, February 2019	Metabolic endotoxemia promotes adipose dysfunction and inflammation in human obesity	0	0	1	1	0	0	0	Human	Thirty-three obese patients [body mass index (BMI) = 53.22 ± 6.10 kg/m2] were recruited at the Endocrinology Service of the Virgen de la Victoria University Hospital …χ2 test to compare the frequencies of patients with hypertriglyceridemia and diabetes and sex distribution between the study groups
Endocrinology	14	Endocrinology	Reproductive Biology and Sex-Based Medicine	Volume 160, Issue 2, February 2019	Circulating Exosomal miRNA Profile During Term and Preterm Birth Pregnancies: A Longitudinal Study	0	1	0	0	0	0	0	Human	A hospital-based cohort of pregnant women was initiated in 2015 at a district hospital in Gurugram, Haryana...Serial biospecimens are being collected across pregnancy (at the first, second, and third trimesters), at delivery, and after delivery.
Endocrinology	20	Endocrinology	Signaling Pathways	Volume 160, Issue 3, March 2019	Quantitative Proteomics by SWATH-MS of Maternal Plasma Exosomes Determine Pathways Associated With Term and Preterm Birth	0	1	0	0	0	0	0	Human	Subjects were recruited at the Centennial Medical Center, Nashville, TN. Institutional review boards at TriStar, Nashville, TN, approved this study. All included pregnancies were singleton live births
Endocrinology	1	Eur. J. Endocrinology		Volume 180, Issue 1	Postoperative use of somatostatin analogs and mortality in patients with acromegaly	0	0	1	1	1	0	0	Human	Data on baseline demographic characteristics (age, sex, life expectancy), tumor size at diagnosis, date….Sex (female vs male) 0.907 0.341	Rat
Endocrinology	2	Eur. J. Endocrinology		Volume 180, Issue 1	Increased cardiovascular risk in thyroid cancer patients taking levothyroxine: a nationwide cohort study in Korea	0	0	1	1	1	0	0	Human	he study population included all subjects who received thyroidectomy (either lobectomy or total) forthyroid cancer (ICD-10 C73) from January 1, 2004 to December 31, 2012 (n=214 084). Sex, n (%), female 153 578 (84.2) 153 524 (84.2) 0.806	Human
Endocrinology	3	Eur. J. Endocrinology		Volume 180, Issue 1	One-step nucleic acid amplification for intraoperative analysis of sentinel lymph node in papillary thyroid carcinoma	0	0	1	1	0	0	0	Human	Between July 2013 and April 2016 we prospectively and consecutively included all patients over 18 years of age that met the following criteria...Gender (female), n (%) 28 (80)	Mouse
Endocrinology	4	Eur. J. Endocrinology		Volume 180, Issue 1	Hypoglycaemia is associated with increased risk of fractures in patients with type 2 diabetes mellitus: a cohort study	0	0	1	1	0	0	0	Human	Adult patients aged >18 with type 2 diabetes mellitus registered in general practices…Gender n (%) provided in Table 1	Hampster
Endocrinology	5	Eur. J. Endocrinology		Volume 180, Issue 1	Novel mutations associated with inherited human calcium-sensing receptor disorders: A clinical genetic study	0	0	1	1	0	0	0	Human	The CASR gene was screened for mutations in a cohort of 130 patients (79 females) from 82 different unrelated families…	Cat
Endocrinology	6	Eur. J. Endocrinology		Volume 180, Issue 1	Radiofrequency ablation for benign thyroid nodules according to different ultrasound features: an Italian multicentre prospectivestudy	0	0	1	1	0	0	0	Human	Inclusion criteria were patients aged 18 years or older, no previous external beam radiation or I131 treatments, cosmetic or compressive symptoms in patients with refusal or ineligibility for surgery….Number of patients 337 Female 76%	Dog
Endocrinology	7	Eur. J. Endocrinology		Volume 180, Issue 2	The SLC16A11 risk haplotype is associated with decreased insulin action, higher transaminases and large-size adipocytes	0	0	1	1	1	0	0	Human	We enrolled Mexican-mestizo men and women (with parents and grandparents born in Mexico)…Female sex 298 (60.0) 392 (63.6) 0.252	Sheep
Endocrinology	8	Eur. J. Endocrinology		Volume 180, Issue 2	IGFBP-2 and aging: a 20-year longitudinal study on IGFBP-2, IGF-I, BMI, insulin sensitivity and mortality in an aging population	0	0	1	1	1	0	0	Human	A general description of the sample population, the recruitment criteria and implementation of the BLSA, have been previously reported (16, 17)….	Non-human primate
Endocrinology	9	Eur. J. Endocrinology		Volume 180, Issue 2	Plasma steroid metabolome profiling for the diagnosis of adrenocortical carcinoma	0	0	1	1	1	0	0	Human	Plasma samples were prospectively collected in a single center as part of the European Network for the study of adrenal tumors….Sex, male 29 (44) 15 (36) 0.396	Other
Endocrinology	10	Eur. J. Endocrinology		Volume 180, Issue 2	Bone microarchitecture and volumetric bone density impairment in young male adults with childhood-onset growth hormone deficiency	1	0	0	0	0	1	0	Human	A total of 20 consecutive male patients with CO AGHD were enrolled in this cross-sectional study…Female subjects were not enrolled to avoid potential gender-dimorphic variations in bone microarchitecture.	Rat and Mouse
Endocrinology	11	Eur. J. Endocrinology		Volume 180, Issue 3	MRI T2 signal intensity and tumor response in patients with GH-secreting pituitary macroadenoma: PRIMARYS post hoc analysis	0	0	1	1	0	0	0	Human	Men and women (age, 18–75 years) with acromegaly and pituitary macroadenoma (diameter ≥10 mm) were eligible…Men:women (n(%))	Multiple species
Endocrinology	12	Eur. J. Endocrinology		Volume 180, Issue 3	Metformin induces weight loss associated with gut microbiota alteration in non-diabetic obese women: a randomized double-blind clinical trial	0	1	0	0	0	0	0	Human	Forty-six obese women were randomly assigned to the metformin (500 mg/tab) or placebo groups	Other
Endocrinology	13	Eur. J. Endocrinology		Volume 180, Issue 3	Changes in marrow adipose tissue with short-term changes in weight in premenopausal women with anorexia nervosa	0	1	0	0	0	0	0	Human	We conducted a 12-month longitudinal study including 46 premenopausal women (n = 26 with anorexia nervosa and n = 20 normal-weight controls) with a mean (s.e.m.) age of 28.2 ± 0.8 years
Endocrinology	14	Eur. J. Endocrinology		Volume 180, Issue 3	Non-invasive DXA-derived bone structure assessment of acromegaly patients: a cross-sectional study	0	0	1	1	1	0	0	Human	In total, 106 (38 males/68 females; average age of 56.3 years) acromegaly patients and 104 (16 males/88 females; average years of 54.1 years) control subjects
Endocrinology	15	Eur. J. Endocrinology		Volume 180, Issue 3	Causes, patterns and severity of androgen excess in 487 consecutively recruited pre- and post-pubertal children	0	0	1	1	1	0	0	Human	We included all children who had undergone measurements of serum testosterone, A4 and DHEAS as part of routine clinical care at BWCH between 1st January 2013 and 1st June 2017 (n=1525)
Endocrinology	16	Eur. J. Endocrinology		Volume 180, Issue 4	Targetable gene fusions identified in radioactive iodine refractory advanced thyroid carcinoma	0	0	1	1	1	0	0	Human	FFPE tissue blocks were collected from 132 patients in the Netherlands with recurrent RAI-R thyroid carcinoma... Tested cases did not significantly differ based on age of onset, gender, histological subtype and genetic alterations distribution from non-tested cases
Endocrinology	17	Eur. J. Endocrinology		Volume 180, Issue 4	Mentally tiring work and type 2 diabetes in women: a 22-year follow-up study	0	1	0	0	0	0	0	Human	We included 75 546 women who completed the 1992 follow-up questionnaire, who had already worked and who had responded to the question on mentally tiring work.
Endocrinology	18	Eur. J. Endocrinology		Volume 180, Issue 4	Increased risk of obstructive sleep apnoea in women with polycystic ovary syndrome: a population-based cohort study	0	1	0	0	0	0	0	Human	76 978 women with PCOS and 143 077 age-, BMI- and location-matched women without PCOS…
Endocrinology	19	Eur. J. Endocrinology		Volume 180, Issue 5	Ambient temperature and prevalence of diabetes and insulin resistance in the Spanish population: Di@bet.es study	0	0	1	1	0	0	0	Human	The study sample comprised 5072 individuals with a mean age of 50.4 years (age range: 18–93 years). 57.1% were female.
Endocrinology	20	Eur. J. Endocrinology		Volume 180, Issue 5	Pituitary deficiency and precocious puberty after childhood severe traumatic brain injury: a long-term follow-up prospective study	0	0	1	1	1	0	0	Human	Plasma/serum concentrations of luteinizing hormone (LH), follicle-stimulating hormone (FSH) and testosterone (male) or oestradiol (female) were assessed in girls over 10 years, boys over 11 years and in children showing clinical evidence of PP.
Endocrinology	3	J. Neuroendo		Volume 31, Issue 2, February 2019	Sex‐specific contribution of DHEA‐cortisol ratio to prefrontal‐hippocampal structural development, cognitive abilities and personality traits	0	0	1	1	1	0	0	Human	Participants were recruited across the USA with a population‐based sampling method seeking to achieve a representative sample in terms of income level, race and ethnicity.
Endocrinology	4	J. Neuroendo		Volume 31, Issue 2, February 2019	Aberrant intra and inter network resting state functional connectivity in thyrotoxicosis	0	0	1	1	0	0	0	Human	Twenty‐eight healthy controls (18 females, 10 males, all right‐handed, mean ± SD age = 33.28 ± 8.26 years) and 28 thyrotoxicosis patients (17 females, 11 males, all right‐handed, mean ± SD age = 34.25 ± 7.05 years) were recruited for the present study.
Endocrinology	7	J. Neuroendo		Volume 31, Issue 4, April 2019	Double transcranial direct current stimulation of the brain increases cerebral energy levels and systemic glucose tolerance in men	1	0	0	0	0	0	0	Human	Fifteen healthy male volunteers (aged 25.3 ± 0.76 years, body mass index 22.84 ± 0.28 kg m‐2) participated in the present study.
Endocrinology	8	J. Neuroendo		Volume 31, Issue 4, April 2019	Partial withdrawal of levothyroxine treated disease leads to brain activations and effects on performance in a working memory task: A pilot study	0	0	1	1	0	0	0	Human	Fifteen right‐handed subjects under long‐term, stable levothyroxine therapy (13 women) participated in the study. The mean age was 36.2 years (range 19‐61 years).
Endocrinology	9	J. Neuroendo		Volume 31, Issue 4, April 2019	Age‐specific associations between oestradiol, cortico‐amygdalar structural covariance, and verbal and spatial skills	0	0	1	1	1	0	0	Human	433 participants were recruited across the USA with a population‐based sampling method seeking to achieve a representative sample in terms of income level and ethnicity. Males and females were matched on pubertal stage.
Endocrinology	10	J. Neuroendo		Volume 31, Issue 4, April 2019	Short‐ and long‐term responsiveness to low dose growth hormone (GH) in adult GH deficiency: Role of GH receptor polymorphism	0	0	1	1	1	0	0	Human	In total, 87 consecutive adult GHD patients were enrolled in this prospective study, which was conducted at the Endocrinology Department of the Catholic University of Rome….Sixty‐nine patients with GHD that occurred in adulthood were studied (males, n = 37; females, n = 32; median age 46 years, range 19‐77 years).
Endocrinology	4	AJP Endo Metab		Volume 316, Issue 1, January 2019	Adipose tissue transplantation ameliorates lipodystrophy-associated metabolic disorders in seipin-deficient mice	0	1	0	0	0	0	0	Mouse	The 6-wk-old SKO and WT female mice were divided into the following four groups (n = 8):…
Endocrinology	6	AJP Endo Metab		Volume 316, Issue 1, January 2019	Berberine alleviates insulin resistance by reducing peripheral branched-chain amino acids	1	0	0	0	0	0	0	Mouse	Five-week-old male C57BL/6J mice were purchased from Vital River Laboratory Animal Technology (Beijing, China) and maintained in groups of four mice per cage at the Animal Facility of Beijing Shijitan Hospital.
Endocrinology	8	AJP Endo Metab		Volume 316, Issue 1, January 2019	The effect of PPARγ inhibition on bone marrow adipose tissue and bone in C3H/HeJ mice	0	1	0	0	0	0	0	Mouse	Forty 40 female, 12-wk-old, C3H/HeJ mice (stock: 000659; Jackson Laboratories) were randomly assigned to four treatment groups (n = 10/group).
Endocrinology	9	AJP Endo Metab		Volume 316, Issue 1, January 2019	Ablation of amyloid precursor protein increases insulin-degrading enzyme levels and activity in brain and peripheral tissues	0	0	1	0	0	0	0	Mouse	Both male and female mice were utilized in this study.
Endocrinology	10	AJP Endo Metab		Volume 316, Issue 1, January 2019	Insulin signaling in LepR cells modulates fat and glucose homeostasis independent of leptin	0	0	1	1	1	0	0	Mouse	Adult (12-wk-old) LRΔInsR or ob/ob LRΔInsR and age-matched control InsRfl, LRcre, and ob/ob LRcre (n = 6–8/genotype) males and females…
Endocrinology	11	AJP Endo Metab		Volume 316, Issue 1, January 2019	Involvement of the STAT5-cyclin D/CDK4-pRb pathway in β-cell proliferation stimulated by prolactin during pregnancy	0	1	0	0	0	0	0	Mouse	The C57BL/6 female mice were supplied by the Model Animal Research Center of Nanjing University.
Endocrinology	12	AJP Endo Metab	Browning and Beiging of Adipose Tissue: Its Role in the Regulation of Energy Homeostasis and as a Potential Target for Alleviating Metabolic Diseases	Volume 316, Issue 2, February 2019	Repression of adipose vascular endothelial growth factor reduces obesity through adipose browning	0	0	1	1	1	0	0	Mouse	The colony was maintained in a pathogen-free facility with controlled temperature at 21 ± 1°C, 30–60% humidity, 12:12-h light/dark cycles, and free access to food and water….body weight on high-fat diet (HFD) in female (n = 6) and male (n = 6) mice for 7 wk at age ...
Endocrinology	13	AJP Endo Metab	Immunometabolic Cross-Talk and Regulation of Endocrine and Metabolic Functions	Volume 316, Issue 2, February 2019	Estrogen receptor-α signaling maintains immunometabolic function in males and is obligatory for exercise-induced amelioration of nonalcoholic fatty liver	0	0	1	1	1	0	0	Mouse	Tissue lysates, including white adipose tissue (WAT), liver, and muscle from WT male and female mice on a C57Bl/6 background…These mice underwent a glucose tolerance test at 25 wk of age to determine sex differences in metabolic function.
Endocrinology	14	AJP Endo Metab	Immunometabolic Cross-Talk and Regulation of Endocrine and Metabolic Functions	Volume 316, Issue 2, February 2019	Hepatic STAT3 inhibition amplifies the inflammatory response in obese mice during sepsis	0	0	1	0	0	0	0	Mouse	Male C57BL/6 mice at 6 wk of age from Charles River Laboratories International, (Wilmington, MA) were randomized to high-fat diet….Male and female H-STAT3 KO and control mice were weighed once a week, and at 13 wk of age they underwent CLP as described above.
Endocrinology	16	AJP Endo Metab	Mitochondria Dysfunction in Aging and Metabolic Diseases	Volume 316, Issue 2, February 2019	The E3 ligase MARCH5 is a PPARγ target gene that regulates mitochondria and metabolism in adipocytes	1	0	0	0	0	0	0	Mouse	Four-week-old male C57BL/6J mice were sourced from the Alfred Medical Research and Education Precinct Animal Centre…
Endocrinology	20	AJP Endo Metab		Volume 316, Issue 2, February 2019	Transgene-associated human growth hormone expression in pancreatic β-cells impairs identification of sex-based gene expression differences	0	0	1	1	1	0	0	Mouse	Mice were fed a standard chow diet (PicoLab, 5L0D), maintained on a 12:12-h light-dark cycle, and housed in a specific-pathogen-free facility at Vanderbilt University ...using FACS-purified β-cells from male and female mice to identify sex-specific gene expression
Endocrinology	1	Endocrinology	Diabetes, Pancreatic and Gastrointestinal Hormones	Volume 160, Issue 1, January 2019	Suppression of Prolactin Secretion Partially Explains the Antidiabetic Effect of Bromocriptine in ob/ob Mice	0	0	1	1	1	0	0	Mouse	All experiments were performed on 5-month-old ob/ob mice, weighing an average of 56 g. As previously shown, ob/ob mice are infertile and females acyclic, maintaining a persistent estrous-like vaginal cytology (32–34). Male and female mice were produced in our local animal facility
Endocrinology	3	Endocrinology	Growth, Growth Hormone, and Growth Factors	Volume 160, Issue 1, January 2019	Adipocyte-Specific GH Receptor–Null (AdGHRKO) Mice Have Enhanced Insulin Sensitivity With Reduced Liver Triglycerides	0	0	1	1	1	0	0	Mouse	In the current study, 34 mice (6 female AdGHRKO mice, 8 female floxed littermate controls, 9 male AdGHRKO mice, and 11 male floxed littermate controls) were used to collect all measurements.
Endocrinology	4	Endocrinology	Obesity and Adipocyte Biology	Volume 160, Issue 1, January 2019	Intermittent Fasting Improves Glucose Tolerance and Promotes Adipose Tissue Remodeling in Male Mice Fed a High-Fat Diet	1	0	0	0	0	0	0	Mouse	Forty-eight male C57BL/6J mice (Bioresources; South Australian Health and Medical Research Institute, Adelaide, Australia) were housed four per cage…
Endocrinology	7	Endocrinology	Reproductive Biology and Sex-Based Medicine	Volume 160, Issue 1, January 2019	17β-Estradiol and 17α-Ethinyl Estradiol Exhibit Immunologic and Epigenetic Regulatory Effects in NZB/WF1 Female Mice	0	1	0	0	0	1	0	Mouse	Genetically lupus-prone NZB/WF1 (NZBWF1/J, stock no. 100008) mice were purchased from The Jackson Laboratory (Bar Harbor, ME). Wild-type B6 mice were bred in the Virginia-Maryland College of Veterinary Medicine vivarium…Since historically, predominantly females are exposed to these estrogenic compounds through contraceptive use and estrogen replacement therapy, and lupus exhibits a strong female …
Endocrinology	8	Endocrinology	Reproductive Biology and Sex-Based Medicine	Volume 160, Issue 1, January 2019	Bitter Taste Receptor Ligand Improves Metabolic and Reproductive Functions in a Murine Model of PCOS	0	1	0	0	0	0	0	Mouse	At 7 weeks of age, female mice on a mixed-strain background (129X1/SvJ, C57BL/6J, CD1) were fed and maintained on a HFD for 11 weeks before and throughout the course of study.
Endocrinology	9	Endocrinology	Adrenal	Volume 160, Issue 2, February 2019	In Vivo Verification of the Pathophysiology of Lipoid Congenital Adrenal Hyperplasia in the Adrenal Cortex	0	0	1	1	1	0	0	Mouse	All animal studies were approved by the Laboratory Animal Center at Keio University School of Medicine (Tokyo, Japan)...Based on these results, we injected 100 mg/kg body weight TAM (Sigma-Aldrich, St. Louis, MO) into 8-week-old TAM-inducible Star KO female mice (IP) once every 24 hours for five consecutive days and 75 mg/kg body weight TAM three times every other day to male mice of the same age.
Endocrinology	11	Endocrinology	Obesity and Adipocyte Biology	Volume 160, Issue 2, February 2019	Sex Differences in Inflammatory Responses to Adipose Tissue Lipolysis in Diet-Induced Obesity	0	0	1	1	1	0	0	Mouse	Mice used in the experiments were male and female C57BL/6J purchased from The Jackson Laboratory
Endocrinology	12	Endocrinology	Obesity and Adipocyte Biology	Volume 160, Issue 2, February 2019	Lateral Hypothalamic Mc3R-Expressing Neurons Modulate Locomotor Activity, Energy Expenditure, and Adiposity in Male Mice	1	0	0	0	0	0	0	Mouse	Cohorts of male Mc3rcre mice were injected bilaterally in the LHA with 200 nL of AAV2-flex-taCasp3-TEVp virus…
Endocrinology	13	Endocrinology	Pituitary and Neuroendocrinology	Volume 160, Issue 2, February 2019	Proton Sensitivity of Corticotropin-Releasing Hormone Receptor 1 Signaling to Proopiomelanocortin in Male Mice	1	0	0	0	0	0	0	Mouse	Four-week-old male mice were used for the experiments.
Endocrinology	15	Endocrinology	Signaling Pathways	Volume 160, Issue 2, February 2019	Prenatal Bisphenol A Exposure in Mice Induces Multitissue Multiomics Disruptions Linking to Cardiometabolic Disorders	0	0	1	1	1	0	0	Mouse	Inbred C57BL/6J mice were maintained on a special diet…Male and female offspring were examined for a spectrum of metabolic phenotypes. In the male set, the control group had n = 9, and the BPA group had n = 11. For females, the control group had n = 9, and the BPA group had n = 13.
Endocrinology	16	Endocrinology	Diabetes, Pancreatic and Gastrointestinal Hormones	Volume 160, Issue 3, March 2019	Glucose-Lowering by Leptin in the Absence of Insulin Does Not Fully Rely on the Central Melanocortin System in Male Mice	1	0	0	0	0	0	0	Mouse	We used 3- to 6-month-old male mice whose body weights (BWs) were >25 g.
Endocrinology	18	Endocrinology	Parathyroid, Bone, and Mineral Metabolism	Volume 160, Issue 3, March 2019	The Role of Dickkopf-1 in Thyroid Hormone–Induced Changes of Bone Remodeling in Male Mice	1	0	0	0	0	1	0	Mouse	At the age of 16 weeks, male Dkk1fl/fl;Rosa26-CreERT2–positive and –negative littermate control mice received subcutaneous injections of 100 µL tamoxifen...We included only male mice to limit possible confounding off-target effects of tamoxifen in young female mice and other sex hormone turbulences of female mice.
Endocrinology	1	J. Neuroendo		Volume 31, Issue 1, January 2019	Isolation and identification of endogenous RFamide‐related peptides 1 and 3 in the mouse hypothalamus	0	0	1	0	0	0	0	Mouse	Male and female C57BL/6J (WT) and Rfrp KO mice (8‐10 weeks old) were provided with standard rodent chow diet and water ad lib., and kept under conditions of controlled lighting (lights on 7:00 am) and temperature (24°C) until used for the experiments….One hundred and twenty adult male or female WT mice were used to identify RFRP1 and RFRP3 peptides.
Endocrinology	2	J. Neuroendo		Volume 31, Issue 1, January 2019	Late onset obesity in mice with targeted deletion of potassium inward rectifier Kir7.1 from cells expressing the melanocortin‐4 receptor	0	0	1	1	1	0	0	Mouse	Male and female mice were used for these experimental procedures.
Endocrinology	6	J. Neuroendo		Volume 31, Issue 2, February 2019	RANK deletion in neuropeptide Y neurones attenuates oestrogen deficiency‐related bone loss	0	1	0	0	0	1	0	Mouse	All data presented are from female mice….n addition, neuronal deletion of RANK has been shown to be involved in thermoregulation in female but not male mice,1 although it is unknown exactly which neurones are involved in this process. Therefore, we also used our female NPYcre/+;RANKlox/lox mice to investigate whether NPY neurones contribute to the control of thermoregulation by RANK.
Endocrinology	11	J. Neuroendo		Volume 31, Issue 4, April 2019	Hyperthermia‐induced seizures followed by repetitive stress are associated with age‐dependent changes in specific aspects of the mouse stress system	1	0	0	0	0	1	0	Mouse	Because collecting vaginal smears to control oestrous cycle in females would add an extra layer of stress to our experiments, we performed the experiments in male pups only.
Endocrinology	16	J. Neuroendo		Volume 31, Issue 6, June 2019	Both neural and global androgen receptor overexpression affect sexual dimorphism in the mouse brain	0	0	1	1	1	0	0	Mouse	Two separate groups of animals were used. The first group of 50 animals was composed of an even split of 25 males and 25 females, with approximately equal numbers of Nestin (NES), cytomegalvirus (CMV) and wild‐type (WT) littermate controls within the sex groups.
Endocrinology	18	J. Neuroendo		Volume 31, Issue 6, June 2019	Sexual cues influence cocaine‐induced locomotion, anxiety and the immunoreactivity of oestrogen receptor alpha and tyrosine hydroxylase in both sexes	0	0	1	1	1	0	0	Mouse	All subject mice were first divided into female and male groups and were then treated with a regimen of saline, cocaine, LSC and empty cage to form four subgroups in males and females, respectively: saline + LSC (SL) group (n = 15); cocaine + LSC (CL) group (n = 15); saline + empty cage (SE) group (n = 10); and cocaine + empty cage (CE) group (n = 10).
Endocrinology	3	AJP Endo Metab		Volume 316, Issue 1, January 2019	Skeletal muscle interstitial fluid metabolomics at rest and associated with an exercise bout: application in rats and humans	0	0	1	1	0	0	0	Multiple species	Ten adult male Sprague-Dawley rats (Charles River) were fed standard laboratory rodent chow (catalog no. 2920X, Envigo) before testing….Five healthy adults (3 female and 2 male, body mass index >18 to <35 kg/m2, 21–46 yr of age) were included.
Endocrinology	10	Endocrinology	Diabetes, Pancreatic and Gastrointestinal Hormones	Volume 160, Issue 2, February 2019	Hepatic HKDC1 Expression Contributes to Liver Metabolism	0	0	1	1	0	0	0	Multiple species	All mice were obtained from The Jackson Laboratory and housed under a 12-hour light, 12-hour dark cycle with ad libitum access to normal chow (Envigo), unless otherwise noted…Liver samples for the percentage of steatosis had stage 1 fibrosis only and included 16 male and four female subjects (steatosis across group ranged from 10% to 66%). Samples for the stages of fibrosis included 29 male (72.5…
Endocrinology	17	Endocrinology	Nuclear Receptors and their Ligands	Volume 160, Issue 3, March 2019	Adipocyte GR Inhibits Healthy Adipose Expansion Through Multiple Mechanisms in Cushing Syndrome	0	0	1	1	0	0	0	Multiple species	Corticosterone (Sigma-Aldrich) or vehicle was added to the drinking water of 8-week-old male C57BL/6J mice (CLEA Japan) (final concentration, 50 μg/mL) for 2 weeks. Corticosterone was added to the drinking water of 8- to 13-week-old male AGRKO mice or GR floxed mice...Patients diagnosed with adrenal Cushing syndrome, primary aldosteronism (PA), and nonfunctional adrenal adenoma (NFA) between 1 Ja…
Endocrinology	5	AJP Endo Metab		Volume 316, Issue 1, January 2019	Role of pregnancy and obesity on vitamin D status, transport, and metabolism in baboons	0	1	0	0	0	0	0	Non-human primate	Baboons (Papio spp.) were maintained in an outdoor social group environment with food and water given ad libitum. Nonpregnant female nulliparous baboons of similar characteristics were randomly assigned to a control diet or a high-fat/high-energy diet…
Endocrinology	1	AJP Endo Metab	Translational Physiology	Volume 316, Issue 1, January 2019	Effect of metformin and flutamide on insulin, lipogenic and androgen-estrogen signaling, and cardiometabolic risk in a PCOS-prone metabolic syndrome rodent model	0	1	0	0	0	0	0	Rat	PCOS-prone and control (lean, normal, non-PCOS) rodents were raised in an established breeding colony at the University of Alberta,...Rats were weaned at 21 days of age and housed in the 12:12 h reversed light cycle to allow establishment of a normal diurnal cycle.
Endocrinology	7	AJP Endo Metab		Volume 316, Issue 1, January 2019	Acute recovery from disuse atrophy: the role of stretch-activated ion channels in the activation of anabolic signaling in skeletal muscle	1	0	0	0	0	0	0	Rat	Male Wistar rats (obtained from the certified Nursery for Laboratory Animals of the Institute of Bioorganic Chemistry…
Endocrinology	2	Endocrinology	Diabetes, Pancreatic and Gastrointestinal Hormones	Volume 160, Issue 1, January 2019	PEPCK1 Antisense Oligonucleotide Prevents Adiposity and Impairs Hepatic Glycogen Synthesis in High-Fat Male Fed Rats	1	0	0	0	0	0	0	Rat	Normal male Sprague-Dawley (Envigo, Indianapolis, IN) rats weighing 300 to 325 g were housed in a 12-hour dark/light cycle,…
Endocrinology	5	Endocrinology	Pituitary and Neuroendocrinology	Volume 160, Issue 1, January 2019	Hysterectomy Uniquely Impacts Spatial Memory in a Rat Model: A Role for the Nonpregnant Uterus in Cognitive Processes	0	1	0	0	0	0	0	Rat	Sixty virgin, reproductively intact female Fischer-344 (CDF) rats were obtained from the National Institute on Aging colony at Charles Rivers Laboratories…
Endocrinology	6	Endocrinology	Pituitary and Neuroendocrinology	Volume 160, Issue 1, January 2019	Genome-Wide Analysis of Glucocorticoid-Responsive Transcripts in the Hypothalamic Paraventricular Region of Male Rats	1	0	0	0	0	0	0	Rat	Male Wistar rats (body weight, 280 to 300 g) were maintained under standard conditions in the animal facility….
Endocrinology	5	J. Neuroendo		Volume 31, Issue 2, February 2019	Nitric oxide acutely modulates hypothalamic and neurohypophyseal carbon monoxide and hydrogen sulphide production to control vasopressin, oxytocin and atrial natriuretic peptide release in rats	1	0	0	0	0	0	0	Rat	Male Wistar rats (weighing 250‐300 g; aged 6‐7 weeks) obtained from the animal facility of Ribeirão Preto Campus, University of São Paulo, Brazil, were maintained under a 12:12 hour light/dark cycle (lights on 6.00 am) at 23 ± 2°C with access to tap water and pelleted food available ad lib.
Endocrinology	13	J. Neuroendo		Volume 31, Issue 4, April 2019	Whole body sodium depletion modifies AT1 mRNA expression and serotonin content in the dorsal raphe nucleus	1	0	0	0	0	0	0	Rat	The immunofluorescence and real‐time polymerase chain reaction (PCR) study were performed in male Wistar rats from the Instituto de Investigación Médica Mercedes y Martin Ferreyra...The drinking experiments were carried out with male Holtzman rats from the Araraquara colony at São Paulo State University (UNESP), Brazil.
Endocrinology	14	J. Neuroendo		Volume 31, Issue 4, April 2019	Oestradiol acts through its beta receptor to increase vasopressin neuronal activation and secretion induced by dehydration	0	1	0	0	0	0	0	Rat	Female Wistar rats (weighing 250‐280 g), obtained from the Animal Facility from the Campus of Ribeirao Preto, University of Sao Paulo, Brazil, were housed under a 12:12 hour light/dark photocycle…
Endocrinology	15	J. Neuroendo		Volume 31, Issue 6, June 2019	Age‐dependent regulation by androgens of gene expression in the anterior hypothalamus and stress‐induced release of adrenal hormones in adolescent and adult male rats	1	0	0	0	0	0	0	Rat	The three experiments involving orchiectomy (ie, OCX) included 294 male Long‐Evans rats obtained at postnatal day (P) 24, P34 and P64 (±1 day),
Endocrinology	17	J. Neuroendo		Volume 31, Issue 6, June 2019	Sex differences in the brain expression of steroidogenic molecules under basal conditions and after gonadectomy	0	0	1	1	1	0	0	Rat	Two‐month‐old male and female Sprague‐Dawley rats, Crl:CD BR (Charles River, Calco, Italy) were group housed (two per group) in open‐top cages
Endocrinology	19	J. Neuroendo		Volume 31, Issue 6, June 2019	ERαΔ4, an ERα splice variant missing exon4, interacts with caveolin‐3 and mGluR2/3	0	1	0	0	0	0	0	Rat	Ovariectomized (ovx) adult female Long‐Evans rats (200‐250 g) were purchased from Charles River.
Endocrinology	20	J. Neuroendo		Volume 31, Issue 6, June 2019	Monosodium l‐glutamate‐obesity onset is associated with disruption of central control of the hypothalamic‐pituitary‐adrenal axis and autonomic nervous system	1	0	0	0	0	0	0	Rat	One day after birth, male Wistar rats were randomly assigned to two different groups. One group was given s.c. cervical injections of MSG (MSG group, n = 30) at a dose of 4 g kg‐1 BW for five consecutive days.17 The control animals (C group, n = 30) received equimolar injections of saline for the same period. Both offspring groups were weaned at day 21. The experimental protocols occurred between…
Endocrinology	19	Endocrinology	Pituitary and Neuroendocrinology	Volume 160, Issue 3, March 2019	Kisspeptin Stimulation of Prolactin Secretion Requires Kiss1 Receptor but Not in Tuberoinfundibular Dopaminergic Neurons	0	0	1	1	0	0	0	Rat and Mouse	Female Kiss1r knockout mice, in which Kiss1r was reinserted in GnRH neurons (Kiss1r−/−R), weighing 20 to 30 g, were used in experiment 1. Female Sprague Dawley rats weighing 250 to 300 g were used in experiment 4. Female Wistar rats weighing 250 to 300 g were used in experiment 2. Experiment 3 was performed in tissue from juvenile male Sprague Dawley rats, 21 to 28 days old,
					Total	18	17	45	42	27	6	0
Table Analyzed	Endocrinology Both Sexes				Table Analyzed	Endocrinology Analyses
P value and statistical significance					P value and statistical significance
Test	Chi-square				Test	Chi-square
Chi-square, df	11.24, 1				Chi-square, df	0.01803, 1
z	3.352				z	0.1343
P value	0.0008				P value	0.8932
P value summary	***				P value summary	ns
One- or two-sided	Two-sided				One- or two-sided	Two-sided
Statistically significant (P < 0.05)?	Yes				Statistically significant (P < 0.05)?	No
Data analyzed	Both Sexes	Single Sex or Unspecified	Total		Data analyzed	Analyzed By Sex	Did Not Analyze by Sex	Total
2009	24	56	80		2009	14	10	24
2019	45	35	80		2019	27	18	45
Total	69	91	160		Total	41	28	69
Percentage of row total	Both Sexes	Single Sex or Unspecified			Percentage of row total	Analyzed By Sex	Did Not Analyze by Sex
2009	30.00%	70.00%			2009	58.33%	41.67%
2019	56.25%	43.75%			2019	60.00%	40.00%
Percentage of column total	Both Sexes	Single Sex or Unspecified			Percentage of column total	Analyzed By Sex	Did Not Analyze by Sex
2009	34.78%	61.54%			2009	34.15%	35.71%
2019	65.22%	38.46%			2019	65.85%	64.29%

## Sheet: Behavioral Physiology
Discipline	Article #	Journal	Category	Date of issue	Article shorthand	Males	Females	Both	N of each sex provided	If both, data anylzed by sex?	Provide rationale for single sex use or analyses	Sex not specified	Mouse and Non-human primate	Method Excerpt
Behavioral physiology	12	J. Comp Psychol		2019, Volume 133, Issue 2 (May)	Perception of the Delboeuf illusion by the adult domestic cat (Felis silvestris catus) in comparison with other mammals.	0	0	1	1	1	0	0	Cat	The remaining 18 cats finally included in the study were 10 males (four intact and six neutered) and eight females (three intact and five neutered), average age of 2.9 years ± 0.4 SEM.	Other
Behavioral physiology	1	J. Comp Psychol		2019, Volume 133, Issue 1 (Feb)	What factors really influence domestic dogs’ (Canis familiaris) search for an item dropped down a diagonal tube? The tubes task revisited.	0	0	1	1	0	0	0	Dog	All test subjects were pet dogs whose owners volunteered to participate in the study….Sixteen dogs (four male, 12 female; mean age = 66 ± 10 months) participated in Experiment 1a	Rat
Behavioral physiology	13	J. Comp Psychol		2019, Volume 133, Issue 2 (May)	Associations among behavioral inhibition and owner-rated attention, hyperactivity/impulsivity, and personality in the domestic dog (Canis familiaris).	0	0	1	1	1	0	0	Dog	Participants were 29 adult family dogs (Mage = 4.59 years, SD = 2.90) of 14 different breeds and 12 mongrels (three intact female, six intact male, 13 spayed female, seven neutered male).
Behavioral physiology	14	J. Comp Psychol		2019, Volume 133, Issue 2 (May)	Social learning of goal-directed actions in dogs (Canis familiaris): Imitation or emulation?	0	0	1	1	0	0	0	Dog	The age of the dogs ranged from 3 to 11 years (M ± SD: 5.8 ± 2.5 years), and 16 of them were females, and four were males.
Behavioral physiology	19	Behavioral Neuroscience		Vol 133(2), Apr, 2019	Male and female hamsters were gestated and reared in a LD (15 hr light/day) or SD (10 hr light/day) with a constant	0	0	1	1	1	0	0	Hampster	Male and female hamsters were gestated and reared in a LD (15 hr light/day) or SD (10 hr light/day) with a constant…
Behavioral physiology	19	J. Comp Psychol		2019, Volume 133, Issue 3 (August)	Life history correlates of human (Homo sapiens) ejaculate quality.	1	0	0	0	0	0	0	Human	Men were eligible to participate if they (a) had not had a vasectomy, (b) had never sought treatment for infertility, (c) were aged 18–35 years, and (d) were currently in a committed, sexually active relationship lasting at least 3 months
Behavioral physiology	2	Behavioral Neuroscience		Vol 133(1), Feb, 2020	Beyond romance: Neural and genetic correlates of altruism in pair-bonds.	0	0	1	1	0	0	0	Human	Participants were 18 (7 females) healthy, right-handed individuals, ages 22–33 (M = 27.4 years ± 3.4) in first-time marriages (M relationship length = 5.8 years ± 2.9; range 2–12), and with no children.
Behavioral physiology	6	Behavioral Neuroscience		Vol 133(1), Feb, 2024	Decision making in response to physiological and combined physiological and psychosocial stress.	0	0	1	1	1	0	0	Human	In total, 90 healthy individuals (45 women and 45 men) participated in our study. All were university students between 18 and 33 years of age, with a mean age of 23.5 years (SD = 3.5).
Behavioral physiology	15	Behavioral Neuroscience		Vol 133(2), Apr, 2019	Amygdala and prefrontal cortex activity varies with individual differences in the emotional response to psychosocial stress.	0	0	1	1	0	0	0	Human	Two-hundred 39 right-handed [126 male, 113 female; age = 19.44 ± 0.07 years (mean ± SEM); range = 17–22 years]
Behavioral physiology	2	Phys&Behav		Volume 198, 1 January 2019	High-intensity interval exercise impairs neuroelectric indices of reinforcement-learning	0	0	1	1	0	0	0	Human	Healthy, young male and female adults were invited to volunteer in this study via advertisements posted around the University of Victoria (n = 25, 16 females; age = 22.4 ± 3.5 years; BMI = 22.5 ± 2.4 kg/m2).
Behavioral physiology	5	Phys&Behav		Volume 198, 1 January 2019	Influence of impending healthy food consumption on snacking: Nudging vs. compensatory behaviour	0	0	1	1	0	0	0	Human	A total of 23 adults (10 men; 23 ± 3 years; BMI: 20.0 ± 2.3 kg/m2; body fat: 22.7 ± 7.6%)) were recruited
Behavioral physiology	6	Phys&Behav		Volume 198, 1 January 2019	Randomized trial of polychromatic blue-enriched light for circadian phase shifting, melatonin suppression, and alerting responses	0	0	1	1	0	0	0	Human	A total of 11 males and 9 females (mean age ± SD of 22.1 ± 1.8 years, range − 19 to 26 years) were studied in the Light Research Laboratory of Thomas Jefferson University
Behavioral physiology	7	Phys&Behav		Volume 198, 1 January 2019	Drop-out, relapse and abstinence in a cohort of alcoholic people under detoxification	0	0	1	1	1	0	0	Human	The sample includes 192 men (mean age 47.72 ± 0.81 SE) and 71 women (mean age 50.73 ± 1.26 SE) receiving a two weeks detoxification and rehabilitation
Behavioral physiology	9	Phys&Behav		Volume 198, 1 January 2019	Relationship of socioeconomic status to olfactory function	0	0	1	1	1	0	0	Human	Three hundred and eighty-one participants over the age of 64 who were members of churches and activity clubs for the elderly were also tested.
Behavioral physiology	10	Phys&Behav		Volume 198, 1 January 2019	Effects of psychological stress during exercise on markers of oxidative stress in young healthy, trained men	1	0	0	0	0	0	0	Human	Fourteen apparently healthy, non-smoking, physically active young men aged 21–30 years participated in this study.
Behavioral physiology	12	Phys&Behav		Volume 198, 1 January 2019	Salivary testosterone concentration, anxiety, perceived performance and ratings of perceived exertion in basketball players during semi-final and final matches	1	0	0	0	0	0	0	Human	Thirty-three elite male basketball players, belonging to U15, U16 and U17 teams of the same club, volunteered for this study.
Behavioral physiology	14	Phys&Behav		Volume 199, Pages 1-404 (1 February 2019)	Effects of blue- and red-enriched light on attention and sleep in typically developing adolescents	0	0	1	1	0	0	0	Human	Twenty-eight typically developing adolescents, 11–17 years old (mean age 14.64 ± 1.89 years), participated in this study (17 male, 11 female).
Behavioral physiology	15	Phys&Behav		Volume 199, Pages 1-404 (1 February 2019)	An online mindfulness-based program is effective in improving affect, over-commitment, optimism and mucosal immunity	0	0	1	1	0	0	0	Human	A total of 22 direct-care workers were recruited from regional Victoria, Australia. The majority of participants were female (85.7%), which was representative of the organisation.
Behavioral physiology	19	Phys&Behav		Volume 199, Pages 1-404 (1 February 2019)	Structured, aerobic exercise reduces fat mass and is partially compensated through energy intake but not energy expenditure in women	0	1	0	0	0	1	0	Human	Thirty-two overweight or obese inactive women were recruited to take part in the study. Only women were recruited to reduce unwanted variability in the design
Behavioral physiology	20	Phys&Behav		Volume 199, Pages 1-404 (1 February 2019)	Neuroticism is associated with reduced oxygenation levels in the lateral prefrontal cortex following exposure to unpleasant images	0	1	0	0	0	0	0	Human	Participants were 24 undergraduate female students (mean age: 20; SD: 1.74 years).
Behavioral physiology	4	Hormones and Behavior		Volume 107, January 2019	Testosterone, fathers as providers and caregivers, and child health: Evidence from fisher-farmers in the Republic of the Congo	0	0	1	0	0	0	0	Human	The final sample for the current study consisted of 16 fathers and all of their available children (total sample size, n = 80 fathers and children).
Behavioral physiology	5	Hormones and Behavior		Volume 107, January 2019	Oxytocin promotes action prediction	0	0	1	1	0	0	0	Human	A total of 61 participants (31 female, 30 male; mean age = 26.69 years, SD = 7.30)
Behavioral physiology	8	Hormones and Behavior		Volume 108, February 2019	Implicit associations to infant cry: Genetics and early care experiences influence caregiving propensities	0	0	1	1	1	0	0	Human	A total of 80 non-parent adults (40 females, 40 males) participated in a within-subject experimental design. Their ages ranged from 18 to 25 years (M = 22.5, SD = 2.2), and their educational level varied from middle school to college. Males and females were matched on age, F < 1, and all the participants were tested individually.
Behavioral physiology	12	Hormones and Behavior		Volume 108, February 2019	Brain and behavioral correlates of insulin resistance in youth with depression and obesity	0	0	1	1	1	0	0	Human	Forty-two overweight or obese youth between the ages of 9 to 17 years with currently untreated depressive symptoms were recruited for this study...Female (N, %) 26 (62%)
Behavioral physiology	16	Hormones and Behavior		Volume 109, March 2019	Influence of glucocorticoid and mineralocorticoid receptor stimulation on task switching	0	0	1	1	1	0	0	Human	We conducted two experiments, each with 80 healthy participants (40 women and 40 men), and tested the effect of the unspecific MR/GR agonist hydrocortisone (Experiment I) and the more specific MR agonist fludrocortisone (Experiment II) on switch costs…
Behavioral physiology	17	Hormones and Behavior		Volume 109, March 2019	Acute stress enhances general-knowledge semantic memory	0	0	1	1	1	0	0	Human	Ninety-two Tufts University students participated in the experiment (63 women, M age = 19.57, SD age = 2.83).
Behavioral physiology	19	Hormones and Behavior		Volume 109, March 2019	No difference in cognitive performance or gender role behavior between men with and without hypospadias	0	0	1	1	1	0	0	Human	Patients and controls, males and females, were recruited when participating in a follow-up study of long-term surgical and psychosocial outcomes of hypospadias.
Behavioral physiology	4	Behavioral Neuroscience		Vol 133(1), Feb, 2022	Effects of early-life stress and HDAC inhibition on maternal behavior in mice.	0	1	0	0	0	0	0	Mouse	The animals were laboratory inbred 129Sv mice (Mus musculus) originally obtained from the Jackson laboratory...In total, 49 adult females were used to give birth. Pups of both sexes were randomly assigned to groups, however, in this work, only the data from females were analyzed.
Behavioral physiology	7	Behavioral Neuroscience		Vol 133(1), Feb, 2025	Inborn vs. acquired anxiety in cross-breeding and cross-fostering HAB/LAB mice bred for extremes in anxiety-related behavior.	0	0	1	1	0	0	0	Mouse	Swiss CD1 mice were selectively and bidirectionally bred/inbred for >45 generations. At approximately 3 months of age, after the initial elevated plus-maze (EPM) test, HAB females were cross-mated with LAB males (♀HAB × ♂LAB P generation, 8 pairs) to generate heterozygous F1 hybrids.
Behavioral physiology	16	Behavioral Neuroscience		Vol 133(2), Apr, 2019	Reduction of BDNF results in GABAergic neuroplasticity dysfunction and contributes to late-life anxiety disorder.	1	0	0	0	0	0	0	Mouse	Aged (12 months) male KM mice (Chengdu Dossy Experimental Animal Lit, Chengdu, Sichuan, China) were housed two per cage after locomotor screening
Behavioral physiology	1	Phys&Behav		Volume 198, 1 January 2019	Effects of ovarian hormones on emotional behaviors in dopamine D3 receptor knockout mice	0	1	0	0	0	0	0	Mouse	82 female mice of two genotypes (D3KO and WT) were used in a series of three experiments.
Behavioral physiology	3	Phys&Behav		Volume 198, 1 January 2019	Influence of corticosterone on growth, home-cage activity, wheel running, and aerobic capacity in house mice selectively bred for high voluntary wheel-running behavior	1	0	0	0	0	1	0	Mouse	We chose to use male mice, as female mice tend to have twice the levels of circulating CORT as males, and these levels may shift in response to stage of the estrus cycle [25,26]. One hundred male mice from generation 68 were randomly chosen from litters weaned at 21 days of age...
Behavioral physiology	16	Phys&Behav		Volume 199, Pages 1-404 (1 February 2019)	Glutamate transporter GLT1 inhibitor dihydrokainic acid impairs novel object recognition memory performance in mice	1	0	0	0	0	0	0	Mouse	Adult male Kunming strains of Swiss mice (SJA Laboratory Animal, Hunan, China) weighing 35–40 g were used.
Behavioral physiology	9	Hormones and Behavior		Volume 108, February 2019	Prenatal thyroxine treatment promotes anxiolysis in male Swiss mice offspring	0	0	1	1	0	0	0	Mouse	Swiss Webster mice of 60 days of age (~35 g) derived from the Federal Rural University of Rio de Janeiro colony were used in this protocol. After birth, the offspring were standardized into group maximums of 10 pups (5 males and 5 females) per female. At postnatal day (PND) 21, the female pups were euthanized and the male ones were weaned to eight or ten animals per plastic cage (35 cm × 50 cm × …
Behavioral physiology	10	Hormones and Behavior		Volume 108, February 2019	Nanoparticle encapsulation increases the brain penetrance and duration of action of intranasal oxytocin	1	0	0	0	0	0	0	Mouse	Male Swiss-Webster mice (CFW; Charles River Laboratories, Inc.; Wilmington, MA) weighing between 25 and 40 g served as the subjects of the in vivo experiments.
Behavioral physiology	13	Hormones and Behavior		Volume 108, February 2019	Histone deacetylase inhibitor treatment induces postpartum-like maternal behavior and immediate early gene expression in the maternal neural pathway in virgin mice	0	1	0	0	0	0	0	Mouse	All mice were C57BL/6 J nulliparous adult females (60+ days of age) naive to pups (except for their own littermates).
Behavioral physiology	3	J. Comp Psychol		2019, Volume 133, Issue 1 (Feb)	Baboon (Papio anubis) chimeric face processing by human (Homo sapiens) judges: Influence of stimuli complexity on the perception of oro-facial asymmetries.	0	0	1	1	1	0	0	Multiple species	A total of 80 female undergraduate students from Aix-Marseille University assessed 28 pairs of baboon chimeric faces. The sample comprised 11 females and three males aged from 3 to 21 years (M = 9.5; SD = 5.86), nine of which were adults aged 7 years or older (eight females and one male), and five were adolescents younger than 7 years of age (three females and two males).	Mouse
Behavioral physiology	7	J. Comp Psychol		2019, Volume 133, Issue 1 (Feb)	The structure of ape (hominoidea) intelligence.	0	0	1	1	0	0	0	Multiple species	The primary set of data used were collected on apes by William Hopkins and colleagues (Hopkins et al., 2014; Lacreuse et al., 2014; Russell et al., 2011; Woodley of Menie et al., 2015) at a variety of facilities...ighty-six chimpanzees were tested with a modified version of the PCTB (Herrmann et al., 2007) and then retested ∼2 years later. All were from Yerkes Center with 37 mother reared, 39 nur…	Sheep
Behavioral physiology	16	J. Comp Psychol		2019, Volume 133, Issue 2 (May)	Preference for attractive faces is species-specific	0	0	1	1	1	0	0	Multiple species	A total of 26 students from the University of Grenoble Alpes (23–32 years, 13 women) participated in the experiment….We used 16 Caucasian faces (eight female) and 16 rhesus (16 female) macaque faces to make up the set of face pairs used in the experiments.
Behavioral physiology	2	J. Comp Psychol		2019, Volume 133, Issue 1 (Feb)	Behavioral conservatism is linked to complexity of behavior in chimpanzees (Pan troglodytes): Implications for cognition and cumulative culture.	0	0	1	1	0	0	0	Non-human primate	Twenty-eight chimpanzees participated (nine males; average age: 31.7 years; range: 13.09–50.39) and were group housed at the National Center for Chimpanzee Care	Human
Behavioral physiology	4	J. Comp Psychol		2019, Volume 133, Issue 1 (Feb)	Visual attention, indicative gestures, and calls accompanying gestural communication are associated with sociality in wild chimpanzees (Pan troglodytes schweinfurthii).	0	0	1	1	1	0	0	Non-human primate	The Sonso community of East African chimpanzees (Pan troglodytes schweinfurthii) at the Budongo Conservation Field Station, Budongo Forest Reserve in Uganda (www.budongo.org) was studied in September 2006, between April and July 2007 and March and June 2008. Instances of communication and social relationships of the 12 focal subjects (six adult males and six adult females)	Hampster
Behavioral physiology	5	J. Comp Psychol		2019, Volume 133, Issue 1 (Feb)	Artificial visual stimuli for animal experiments: An experimental evaluation in a prey capture context with common marmosets (Callithrix jacchus).	0	0	1	1	0	0	0	Non-human primate	en common marmosets (Callithrix jacchus), four females and six males, housed at the department of Cognitive Biology, University of Vienna were tested in this experiment.	Cat
Behavioral physiology	6	J. Comp Psychol		2019, Volume 133, Issue 1 (Feb)	Capuchin monkeys (Cebus [sapajus] apella) show planning in a manual maze task.	0	0	1	1	0	0	0	Non-human primate	We tested 10 captive-born brown capuchin monkeys (five male, average age: 13.4 years, range = 8–18 years; five female, average age: 14.4 years, range = 8–19 years)	Dog
Behavioral physiology	8	J. Comp Psychol		2019, Volume 133, Issue 2 (May)	Freestanding bipedal posture and coordinated bimanual manipulation significantly influence lateralized hand use in rhesus monkeys (Macaca mulatta) and chimpanzees (pan troglodytes).	0	0	1	1	1	0	0	Non-human primate	Twenty-two male rhesus macaques (Macaca mulatta) between 4 and 8 years of age….Seventy-nine captive chimpanzees (Pan troglodytes), 32 females and 47 males,	Non-human primate
Behavioral physiology	18	J. Comp Psychol		2019, Volume 133, Issue 3 (August)	Limited evidence of number–space mapping in rhesus monkeys (Macaca mulatta) and capuchin monkeys (Sapajus apella).	0	0	1	1	0	0	0	Non-human primate	We tested five adult male rhesus monkeys between the ages of 15 and 36 years. We tested 14 adult capuchin monkeys (nine females) between the ages of 9 and >40 years
Behavioral physiology	20	J. Comp Psychol		2019, Volume 133, Issue 3 (August)	Monkeys (Sapajus apella and Macaca tonkeana) and great apes (Gorilla gorilla, Pongo abelii, Pan paniscus, and Pan troglodytes) play for the highest bid.	0	0	1	0	0	0	0	Non-human primate	Forty-two subjects took part in the experiment: six brown capuchin monkeys (Sapajus apella), five Tonkean macaques (Macaca tonkeana), six orangutans (Pongo abelii), seven gorillas (Gorilla gorilla), 12 chimpanzees (Pan troglodytes), and six bonobos (Pan paniscus; Table S1 in the online supplemental materials)....Population: Animal / Male / Female
Behavioral physiology	1	Behavioral Neuroscience		Vol 133(1), Feb, 2019	Early amygdala damage alters the way rhesus macaques process species-specific audio-visual vocalizations.	0	0	1	1	1	0	0	Non-human primate	Six adult rhesus monkeys (Macaca mulatta) aged 4–6 years were used in this investigation. Each animal received MRI-guided ibotenic acid amygdala lesions (Group Neo-Aibo; 3 males, 3 females) at 7–17 days of age.
Behavioral physiology	11	Hormones and Behavior		Volume 108, February 2019	Energy balance but not competitive environment corresponds with allostatic load during development in an Old World monkey	0	0	1	1	1	0	0	Non-human primate	We collected data on 41 pre-pubertal juveniles (22 males, 19 females, mean age 4.4 ± 1.7 yrs) for 8 months…
Behavioral physiology	10	J. Comp Psychol		2019, Volume 133, Issue 2 (May)	Object permanence in Giraffa camelopardalis: First steps in giraffes’ physical cognition.	0	0	1	1	0	0	0	Other	We tested six giraffes (Giraffa camelopardalis) ranging from 1 to 21 years of age and housed at the zoos of Barcelona and Leipzig (Table 1).	Rat and Mouse
Behavioral physiology	11	J. Comp Psychol		2019, Volume 133, Issue 2 (May)	The effects of ambient temperature and lighting intensity on wheel-running behavior in a diurnal rodent, the Nile grass rat (Arvicanthis niloticus).	0	0	1	1	0	0	0	Other	A total of 18 adult Nile grass rats (n = 9 males; n = 9 females; age range of 8.5 months to 14.2 months at the end of the experiment;	Multiple species
Behavioral physiology	15	J. Comp Psychol		2019, Volume 133, Issue 2 (May)	Personality in captive killer whales (Orcinus orca): A rating approach based on the five-factor model.	0	0	1	1	0	0	0	Other	We studied 24 killer whales (13 females and 11 males) hosted at Loro Parque (Tenerife, Spain), SeaWorld Orlando (Florida),
Behavioral physiology	17	J. Comp Psychol		2019, Volume 133, Issue 2 (May)	Timing of antisynchronous calling: A case study in a harbor seal pup (Phoca vitulina).	0	1	0	0	0	0	0	Other	The female harbor seal pup was born in the wild. At the estimated age of 7 days, she was brought into rehabilitation
Behavioral physiology	8	Phys&Behav		Volume 198, 1 January 2019	Sick and grumpy: Changes in social behaviour after a controlled immune stimulation in group-housed gilts	0	0	0	0	0	0	1	Other	The experiment was run in two replicates, each consisting of eight groups of three gilts (24 animals in 8 pens per replicate, altogether 48 animals). The pigs were brought into the experimental facility in Oslo at between seven and 10 weeks of age and given at least two weeks (2–4.5) to habituate.
Behavioral physiology	18	Phys&Behav		Volume 199, Pages 1-404 (1 February 2019)	Can disbudding of calves (one versus four weeks of age) induce chronic pain?	1	0	0	0	0	0	0	Other	Thirty-four Holstein bull calves were included in the study
Behavioral physiology	15	Hormones and Behavior		Volume 109, March 2019	Differential effects of androgens, estrogens and socio-sexual context on sexual behaviors in the castrated male goat	0	0	1	1	1	0	0	Other	All animals were Alpine goats between the ages of 2–9 years, and received a diet consisting of grass hay and grain…Focal goats in experiment 1 were gonadally intact males (bucks; n = 12). Stimulus estrous females were estrus-synchronized intact females (does; n = 14) and stimulus non-estrous females were ovariectomized females (OVX does; n = 6). In experiment 2, focal goats were prepubertally cas…
Behavioral physiology	9	J. Comp Psychol		2019, Volume 133, Issue 2 (May)	Locomotion and posture development in immature male and female rats (Rattus norvegicus): Comparison of sensory-enriched versus sensory-deprived testing environments.	0	0	1	1	1	0	0	Rat	A total of 64 rats (32 female, 32 male) from 16 litters (four subjects per litter) were used in this study.	Other
Behavioral physiology	3	Behavioral Neuroscience		Vol 133(1), Feb, 2021	Sexual motivation in male rats is modulated by tropomyosin receptor kinase B (TrkB).	0	0	1	1	0	0	0	Rat	Long-Evans test male rats (N = 18), stimulus male (N = 8), and ovariectomized stimulus female (N = 9) rats were purchased from Harlan Laboratories (Indianapolis, IN)
Behavioral physiology	5	Behavioral Neuroscience		Vol 133(1), Feb, 2023	The effects of early life stress on context fear generalization in adult rats.	1	0	0	0	0	0	0	Rat	Experimentally naïve male Sprague-Dawley rats were used in all experiments, and were either bred at the School of Psychology at the University of New South Wales (UNSW)
Behavioral physiology	8	Behavioral Neuroscience		Vol 133(1), Feb, 2026	Differential involvement of D2 and D3 receptors during reinstatement of cocaine-seeking behavior in the Roman high- and low-avoidance rats.	1	0	0	0	0	0	0	Rat	Fifteen male RHAs and 15 RLAs rats between 3 and 4 months of age were pair-housed in a room maintained on a 12:12h reversed light—dark cycle (lights off at 7:00AM).
Behavioral physiology	9	Behavioral Neuroscience		Vol 133(1), Feb, 2027	Conditioned hedonic responses elicited by contextual cues paired with nausea or with internal pain.	1	0	0	0	0	0	0	Rat	Thirty naive male Wistar rats from the University of Oviedo vivarium (Spain) were used.
Behavioral physiology	10	Behavioral Neuroscience		Vol 133(1), Feb, 2028	Single injection of rapamycin blocks post–food restriction hyperphagia and body-weight regain in rats.	1	0	0	0	0	0	0	Rat	Male Sprague–Dawley rats were obtained from the breeding colony at the Memorial University of Newfoundland’s (MUN) Health Sciences Center
Behavioral physiology	11	Behavioral Neuroscience		Vol 133(1), Feb, 2019	Female rats express habitual behavior earlier in operant training than males.	0	0	1	1	1	0	0	Rat	Twenty-six adult Long Evans, intact female rats (Charles River, Quebec; 75–90 days old at the time of arrival) were housed in pairs in a climate-controlled colony room maintained at 23 °C with a 12-hr light-on-light-off cycle (7:00 a.m. to 7:00 p.m.)….Twenty-one adult male Long Evans rats (Charles River, Quebec; 75–90 days old at the time of arrival), were housed in pairs in a climate-controlled …
Behavioral physiology	12	Behavioral Neuroscience		Vol 133(2), Apr, 2019	Involvement of lactate transport in two object recognition tasks that require either the hippocampus or striatum.	1	0	0	0	0	0	0	Rat	Three-month-old male Long-Evans rats were obtained from Harlan Laboratories (Oregon, WI).
Behavioral physiology	13	Behavioral Neuroscience		Vol 133(2), Apr, 2019	Conditioned partner preference in male and female rats for a somatosensory cue.	0	0	1	1	0	0	0	Rat	Seventy-five female Long-Evans rats, weighing 150 g to 200 g, and 60 male Long-Evans rats, weighing 200 g to 250 g, were obtained from Charles River Canada (St. Constant, Quebec, Canada) at 6 weeks of age
Behavioral physiology	14	Behavioral Neuroscience		Vol 133(2), Apr, 2019	Naloxone Disrupts the Development of a Conditioned Ejaculatory Preference Based on a Somatosensory Cue in Male Rats	0	0	1	1	0	0	0	Rat	Thirty-four Long–Evans male rats weighing 150–200 g and 30 female Long–Evans rats, weighing 200–250 g were obtained from Charles River Canada,
Behavioral physiology	17	Behavioral Neuroscience		Vol 133(2), Apr, 2019	Upregulation of hippocampal extracellular signal-regulated kinase (ERK)–2 induces antidepressant-like behavior in the rat forced swim test.	1	0	0	0	0	0	0	Rat	A total of 21 (8-week-old) male Sprague–Dawley rats (250–275 g) were purchased from Charles River Laboratories (Hollister, CA).
Behavioral physiology	18	Behavioral Neuroscience		Vol 133(2), Apr, 2019	Pair-housing rats does not protect from behavioral consequences of an acute traumatic experience	1	0	0	0	0	0	0	Rat	A total of 142 adult (PND 60–90), male Long Evans rats (Experiment 1: n = 30, Experiment 2: n = 32, Experiment 3: n= 32, Experiment 4: n = 48) were used.
Behavioral physiology	20	Behavioral Neuroscience		Vol 133(2), Apr, 2019	The effects of clavulanic acid and amoxicillin on cue-primed reinstatement of cocaine seeking.	1	0	0	0	0	0	0	Rat	Male Sprague-Dawley rats (Charles River LLC, NC, U.S., N = 42) spent one week habituating to the colony. A subset (n = 35) underwent jugular catheter surgery
Behavioral physiology	4	Phys&Behav		Volume 198, 1 January 2019	Sexually experienced, but not naïve, female rats show a conditioned object preference (COP) for mating after a single training trial	0	0	1	1	0	0	0	Rat	57 adult female Long-Evans rats weighing approximately 200 g were obtained from Envigo Laboratories…Sexually experienced adult male Long-Evans rats were used for mating.
Behavioral physiology	11	Phys&Behav		Volume 198, 1 January 2019	Central oxytocin signaling mediates the central orexin-induced visceral antinociception through the opioid system in conscious rats	1	0	0	0	0	0	0	Rat	Male Sprague-Dawley rats (Charles River Laboratory, Atsugi, Japan) weighing about 200 g were housed under controlled light/dark condition…
Behavioral physiology	13	Phys&Behav		Volume 198, 1 January 2019	Voluntary exercise or systemic propranolol ameliorates stress-related maladaptive behaviors in female rats	0	1	0	0	0	0	0	Rat	Fifty female Long Evans rats were purchased from Envigo…
Behavioral physiology	17	Phys&Behav		Volume 199, Pages 1-404 (1 February 2019)	Predator odor exposure in early adolescence influences the effects of the bacterial product, propionic acid, on anxiety, sensorimotor gating, and acoustic startle response in male rats in later adolescence and adulthood	1	0	0	0	0	1	0	Rat	Thirty-two male Long Evans rats were obtained at 51–75 g from Charles River, Quebec, Canada. PPA has been associated with neurodevelopmental disorders including Autism Spectrum Disorders, which tends to occur more commonly in males than females [15]. As such, male rats were the primary focus in the present study, albeit a limitation, as there is a lack of research on the effect of PPA on female r…
Behavioral physiology	1	Hormones and Behavior		Volume 107, January 2019	Antidepressant agomelatine attenuates behavioral deficits and concomitant pathology observed in streptozotocin-induced model of Alzheimer's disease in male rats Author links open overlay panel	1	0	0	0	0	0	0	Rat	Forty male Sprague Dawley rats weighing 200–230 g (eight weeks old) were obtained from the Breeding animal facility of the Institute of Neurobiology,…
Behavioral physiology	2	Hormones and Behavior		Volume 107, January 2019	Anorexigenic effects of estradiol in the medial preoptic area occur through membrane-associated estrogen receptors and metabotropic glutamate receptors	0	1	0	0	0	0	0	Rat	Female Long Evans rats (Harlan Laboratories, Indianapolis, IN) weighing ~225 g at study onset were used throughout
Behavioral physiology	3	Hormones and Behavior		Volume 107, January 2019	Effects of adolescent Bisphenol-A exposure on memory and spine density in ovariectomized female rats: Adolescence vs adulthood	0	1	0	0	0	0	0	Rat	Experimentally naïve Sprague Dawley female rats (n = 66) were obtained from Charles River Laboratories…
Behavioral physiology	6	Hormones and Behavior		Volume 107, January 2019	Sexual experience confers resilience to restraint stress in female rats	0	1	0	0	0	0	0	Rat	86 adult female Long-Evans rats weighing approximately 200 g obtained from Harlan Laboratories…Sexually experienced, adult male Long-Evans rats were used as stimulus rats.
Behavioral physiology	7	Hormones and Behavior		Volume 107, January 2019	Maternal care modulates transgenerational effects of endocrine-disrupting chemicals on offspring pup vocalizations and adult behaviors	0	0	1	1	1	0	0	Rat	Sprague-Dawley rats were purchased from Harlan Laboratories (Houston, Texas & Indianapolis, Indiana), housed in a temperature- and humidity-controlled room...The primary focus of this experiment was the maternal behavior of the F2 females towards their F3 generational offspring, and F3 physiological and behavioral outcomes
Behavioral physiology	14	Hormones and Behavior		Volume 109, March 2019	Effects of ovarian hormones on the emission of 50-kHz ultrasonic vocalizations during distributed clitoral stimulation in the rat	0	1	0	0	0	0	0	Rat	Eight adult female Long-Evans rats (3–5 months, 250–400 g, Charles River, St- Constant, QC, Canada) were used.
Behavioral physiology	18	Hormones and Behavior		Volume 109, March 2019	Establishment of partner preference in male rats: Effect of prenatal letrozole and sexual experience	0	0	1	0	0	0	0	Rat	Female and male Wistar rats were used in this study.
Behavioral physiology	20	Hormones and Behavior		Volume 110, April 2019	Organizational effects of testosterone on learning strategy preference and muscarinic receptor binding in prepubertal rats	0	0	1	1	1	0	0	Rat	Male and female Long-Evans hooded rats were obtained at 65–70 days of age from Harlan, Inc. (Indianapolis, IN) and mated, yielding 6 litters of pups….At 24 h and 48 h after birth female pups were injected subcutaneously at the nape of the neck with either 150 μg (300 μg total) testosterone propionate (n = 9; Steraloids, Inc., Newport, RI) suspended in sesame oil vehicle (Sigma-Aldrich, Inc.), or …
					Total	19	11	49	46	22	3	1
Table Analyzed	Behavioral Physiology Both Sexes				Table Analyzed	Behavioral Physiology Analyses
P value and statistical significance					P value and statistical significance
Test	Chi-square				Test	Chi-square
Chi-square, df	5.633, 1				Chi-square, df	0.03776, 1
z	2.373				z	0.1943
P value	0.0176				P value	0.8459
P value summary	*				P value summary	ns
One- or two-sided	Two-sided				One- or two-sided	Two-sided
Statistically significant (P < 0.05)?	Yes				Statistically significant (P < 0.05)?	No
Data analyzed	Analyzed By Sex	Single Sex or Unspecified	Total		Data analyzed	Analyzed By Sex	Did Not Analyze by Sex	Total
2009	34	46	80		2009	16	18	34
2019	49	31	80		2019	22	27	49
Total	83	77	160		Total	38	45	83
Percentage of row total	Analyzed By Sex	Single Sex or Unspecified			Percentage of row total	Analyzed By Sex	Did Not Analyze by Sex
2009	42.50%	57.50%			2009	47.06%	52.94%
2019	61.25%	38.75%			2019	44.90%	55.10%
Percentage of column total	Analyzed By Sex	Single Sex or Unspecified			Percentage of column total	Analyzed By Sex	Did Not Analyze by Sex
2009	40.96%	59.74%			2009	42.11%	40.00%
2019	59.04%	40.26%			2019	57.89%	60.00%

## Sheet: Reproduction
Discipline	Article #	Journal	Category	Date of issue	Article shorthand	Males	Females	Both	N of each sex provided	If both, data anylzed by sex?	Provide rationale for single sex use or analyses	Sex not specified	Mouse and Non-human primate	Method Excerpt
Reproduction	13	Biology of Reproduction		Volume 100, Issue 1, January 2019	Distinct inflammatory profile in preeclampsia and postpartum preeclampsia reveal unique mechanisms	0	1	0	0	0	0	0	Human	Women presenting with PPPE namely, new onset PE 48 h to 6 weeks following delivery (same inclusion criteria as for PE), were included. All women with PPPE had uncomplicated pregnancies.
Reproduction	30	Biology of Reproduction		Volume 100, Issue 3, March 2019	Is differences in embryo morphokinetic development significantly associated with human embryo sex?	0	0	1	1	1	0	0	Human	The present research is a retrospective observational study, which was conducted at the Reproductive Medical Center of Tongji Hospital between 2014 and 2016. A total of 1335 patients were enrolled.
Reproduction	32	Biology of Reproduction		Volume 100, Issue 3, March 2019	Effects of letrozole and clomiphene citrate on Wnt signaling pathway in endometrium of polycystic ovarian syndrome and healthy women	0	1	0	0	0	0	0	Human	This quasi-experimental study comprised 48 women with informed written consent obtained before sample collection and was carried out under an approved protocol by the Ethics Committee of Tehran University of Medical Science
Reproduction	38	Biology of Reproduction		Volume 100, Issue 3, March 2019	Tenascin-X in amniotic fluid and reproductive tissues of pregnancies complicated by infection and preterm prelabor rupture of membranes	0	1	0	0	0	0	0	Human	Using a cohort study design, we investigated AF samples from 334 women pregnant with singletons who had a clinically indicated amniocentesis for the purpose of second trimester genetic karyotyping…
Reproduction	9	Reproduction		Volume 157 (2019): Issue 2 (Feb 2019)	Estradiol promotes EMT in endometriosis via MALAT1/miR200s sponge function	0	1	0	0	0	0	0	Human	Twenty ovarian chocolate cysts (ectopic endometriotium of endometriosis patients, mean age: 29.2 ± 4.0, stage III–IV) and 20 eutopic endometrium (mean age: 30.1 ± 3.9, stage III–IV) were obtained by biopsy undergoing laparoscopy in this study.
Reproduction	12	Reproduction		Volume 157 (2019): Issue 3 (Mar 2019)	CXCL16/CXCR6 interaction promotes endometrial decidualization via the PI3K/AKT pathway	0	1	0	0	0	0	0	Human	The subjects recruited into the study were women of reproductive age attending our department between October 2016 and October 2017.
Reproduction	16	Reproduction		Volume 157 (2019): Issue 4 (Apr 2019)	Notch activity mediates oestrogen-induced stromal cell invasion in endometriosis	0	1	0	0	0	0	0	Human	As previously described (Zhang et al. 2016b), normal endometrial samples were obtained from 10 patients aged 27–40 years old (mean age: 33.10 years old) with tubal infertility and without endometriosis
Reproduction	24	Reproduction		Volume 157 (2019): Issue 6 (Jun 2019)	Genome-wide profiling of miRNA expression patterns in tubal endometriosis	0	1	0	0	0	0	0	Human	Seven premenopausal patients with tubal EM (case group) and seven premenopausal patients suffering from uterine leiomyoma (control group) were recruited.
Reproduction	25	Reproduction		Volume 157 (2019): Issue 6 (Jun 2019)	AC002454.1 and CDK6 synergistically promote endometrial cell migration and invasion in endometriosis	0	1	0	0	0	0	0	Human	We selected endometrial and ectopic lesions from the secretory phase of patients with EMS according to preoperative ultrasonography and menstrual cycle data as the experimental group.
Reproduction	28	Reproduction		Volume 158 (2019): Issue 1 (Jul 2019)	Effect of the neuropeptide phoenixin and its receptor GPR173 during folliculogenesis	0	1	0	0	0	0	0	Human	Samples of surgically removed ovarian tissues were obtained from eight women in reproductive age (19-32 years old).
Reproduction	34	Reproduction		Volume 158 (2019): Issue 1 (Jul 2019)	Novel anti-inflammatory actions of TIPE2 in human primary amnion and myometrial cells	0	1	0	0	0	0	0	Human	Placenta (with attached fetal membranes) and myometrium were obtained, with Institutional Research and Ethics Committee approval, from women at the time of delivery.
Reproduction	38	Reproduction		Volume 158 (2019): Issue 3 (Sep 2019)	Dysregulation of the placental renin–angiotensin system in human fetal growth restriction	0	1	0	0	0	0	0	Human	Placentae were collected from The Royal Women’s Hospital Melbourne, with informed consent as approved by the Human Research and Ethics Committee
Reproduction	39	Reproduction		Volume 158 (2019): Issue 3 (Sep 2019)	Characterization of dendritic cell (DC)-10 in recurrent miscarriage and recurrent implantation failure	0	1	0	0	0	0	0	Human	Peripheral blood mononuclear cells (PBMCs) were collected from three groups of patients, including control, RM and RIF groups. The RM group includes ten women who had clinically spontaneous abortion for two or more times occurred prior to 20 weeks of gestation, confirmed by ultrasound
Reproduction	40	Reproduction		Volume 158 (2019): Issue 3 (Sep 2019)	Elevated heme impairs macrophage phagocytosis in endometriosis	0	1	0	0	0	0	0	Human	The patients included in the current study were premenopausal women (aged 22–49 years) who attended the Obstetrics and Gynecology Hospital of Fudan University
Reproduction	2	Biology of Reproduction		Volume 100, Issue 1, January 2019	Targeted ablation of Wnt4 and Wnt5a in Müllerian duct mesenchyme impedes endometrial gland development and causes partial Müllerian agenesis	0	1	0	0	0	0	0	Mouse	To assess fertility in Wnt4flox/flox; Wnt5aflox/flox; Amhr2cre/+ mice, 8-week-old females were housed with 8-week-old wild-type males and monitored daily for litters.	Human
Reproduction	3	Biology of Reproduction		Volume 100, Issue 1, January 2019	Bone marrow-derived cells or C-X-C motif chemokine 12 (CXCL12) treatment improve thin endometrium in a mouse model	0	1	0	0	0	0	0	Mouse	C57 BL/6 female mice and ubiquitin-green fluorescent protein (GFP) male mice were purchased from the Charles River Laboratories (Wilmington, MA) and Jackson Laboratory (Bar Harbor, ME), respectively.	Mouse
Reproduction	6	Biology of Reproduction		Volume 100, Issue 1, January 2019	A novel, noncoding-RNA-mediated, post-transcriptional mechanism of anti-Mullerian hormone regulation by the H19/let-7 axis	0	1	0	0	0	0	0	Mouse	H19-delta3 knockout mice were used for this study...H19KO and WT females (n = 10 per group) were housed with WT stud males of proven fertility for at least 6 months.	Dog
Reproduction	16	Biology of Reproduction		Volume 100, Issue 1, January 2019	Extraembryonic heparin-binding epidermal growth factor-like growth factor deficiency compromises placentation in mice	0	1	0	0	0	0	0	Mouse	Mice with systemic deletion of Hbegf were generated by breeding Hbegfflox/lox mice with CAG-Cre mice [10]. Hbegf+/− females were mated with Hbegf+/− males to induce pregnancy (day 0.5 = vaginal plug). Conceptuses were removed on gestation day 13.5 from Hbegf+/− dams. Each fetus was separated, weighed, and genotyped using genomic DNA by PCR
Reproduction	18	Biology of Reproduction		Volume 100, Issue 1, January 2019	Insulin/IGF1 signaling regulates the mitochondrial biogenesis markers in steroidogenic cells of prepubertal testis, but not ovary	0	0	1	1	1	0	0	Mouse	Male and female prepubertal mice (P21) with INSR and IGF1R deletion in steroidogenic cells were used to investigate transcription…
Reproduction	20	Biology of Reproduction		Volume 100, Issue 1, January 2019	CBLB502, a Toll-like receptor 5 agonist, offers protection against radiation-induced male reproductive system damage in mice	1	0	0	0	0	0	0	Mouse	Male C57BL/6 (8- to 9-week-old) mice were purchased from Vital River Experimental Animal Company
Reproduction	22	Biology of Reproduction		Volume 100, Issue 2, February 2019	Characterization of cell fusion in an experimental mouse model of endometriosis	0	1	0	0	0	0	0	Mouse	Mature (7–8 weeks old) C57BL/6J (wild type) and homozygous Ai6(RCL-ZsGreen) were purchased from Jackson Laboratories. Endometriosis was induced as previously described [21] with modifications. Diestrous uteri from 7- to 8-week old cycling females were isolated...
Reproduction	23	Biology of Reproduction		Volume 100, Issue 2, February 2019	Faster and more efficient swimming: energy consumption of murine spermatozoa under sperm competition	1	0	0	0	0	0	0	Mouse	Adult males (4 months old) of Mus pahari, M. musculus, M. caroli, M. spretus, and M. spicilegus were purchased from the Institut des Sciences de l’Evolution, CNRS-Université
Reproduction	24	Biology of Reproduction		Volume 100, Issue 2, February 2019	The mTORC1 component RPTOR is required for maintenance of the foundational spermatogonial stem cell pool in mice	1	0	0	0	0	0	0	Mouse	Rptor male germ cell KO mice were created by crossing female mice homozygous for a floxed Rptor allele (#013188, The Jackson Laboratory) with young (<P60) male mice carrying one floxed allele as well as the Ddx4-Cre transgene (#006954, The Jackson Laboratory).
Reproduction	25	Biology of Reproduction		Volume 100, Issue 2, February 2019	Sperm capacitation is associated with phosphorylation of the testis-specific radial spoke protein Rsph6a	1	0	0	0	0	0	0	Mouse	CD1 retired breeder male mice were used (Charles River Laboratories, Wilmington, MA).
Reproduction	27	Biology of Reproduction		Volume 100, Issue 2, February 2019	Rapid onset of severe septic shock in the pregnant mouse	0	1	0	0	0	0	0	Mouse	NP CD1 female mice had a Pa-C10 implantable murine radiotelemetry pressure catheter (Data Science International) implanted in the left carotid artery.
Reproduction	28	Biology of Reproduction		Volume 100, Issue 2, February 2019	Sources of all-trans retinal oxidation independent of the aldehyde dehydrogenase 1A isozymes exist in the postnatal testis	1	0	0	0	0	0	0	Mouse	Studies were performed with male mice that were housed in a humidity- and temperature-controlled room…
Reproduction	29	Biology of Reproduction		Volume 100, Issue 2, February 2019	Murine PAIP1 stimulates translation of spermiogenic mRNAs stored by YBX2 via its interaction with YBX2	1	0	0	0	0	0	0	Mouse	C57BL/6 male mice were originally purchased from Vital River Laboratories in Beijing, China
Reproduction	35	Biology of Reproduction		Volume 100, Issue 3, March 2019	Deletion of Adam6 in Mus musculus leads to male subfertility and deficits in sperm ascent into the oviduct	0	0	1	1	0	0	0	Mouse	Wild-type female mice were superovulated and paired with Adam6−/−, Adam6res/res, or control mice. Animals were sacrificed 5–6 h after copulation, and the uterus and attached oviduct were removed.
Reproduction	36	Biology of Reproduction		Volume 100, Issue 3, March 2019	The protein phosphatase isoform PP1γ1 substitutes for PP1γ2 to support spermatogenesis but not normal sperm function and fertility	1	0	0	0	0	0	0	Mouse	Mouse caudal epididymis and vas deferens were isolated together; the artery of vas deferens was carefully removed;…
Reproduction	39	Biology of Reproduction		Volume 100, Issue 3, March 2019	Alterations of sex determination pathways in the genital ridges of males with limited Y chromosome genes	1	0	0	0	0	0	0	Mouse	The primary genotypes of interests used in this study were male mice with a single X chromosome (XO) and a limited Y chromosome gene complement:
Reproduction	7	Reproduction		Volume 157 (2019): Issue 2 (Feb 2019)	In vitro and in vivo mouse follicle development in ovaries and reaggregated ovaries	0	1	0	0	0	0	0	Mouse	F1 pups at postnatal day 2 (P2) and 6 (P6) were cervically dislocated and the ovaries isolated to generate ROs. To allow adequate time for experimental planning and to reduce the number of surplus mice, the minimum neonatal age used was P2. Ovaries were also collected from F1 mice at P2, P6, P16 and P20 for histological analysis.
Reproduction	8	Reproduction		Volume 157 (2019): Issue 2 (Feb 2019)	Acute restraint stress triggers progesterone withdrawal and endometrial breakdown and shedding through corticosterone stimulation in mouse menstrual-like model	0	1	0	0	0	0	0	Mouse	Female mice were placed with vasectomized males and were considered day pseudopregnant, and labeled day 0.5, upon observation of a vaginal seminal plug. On day 3.5 at 15:30 h, 20 μL of arachis oil were injected into the bilateral uterine lumen of each mouse through a dorsal incision to induce decidualization.
Reproduction	13	Reproduction		Volume 157 (2019): Issue 3 (Mar 2019)	Oocyte-specific deletion of Hdac8 in mice reveals stage-specific effects on fertility	0	1	0	0	0	0	0	Mouse	Female mice carrying the Hdac8 floxed allele (fl/+), a kind gift from Eric Olson (Haberland et al. 2009) were crossed either with Zp3-Cre (JAX #003651) (de Vries et al. 2000) or Vasa-Cre (JAX # 006954) (Gallardo et al. 2007) male mice. To analyze the fertility of female mice with various genotypes, mutant female mice (6–8 weeks old) were bred with wild-type C57BL/6J mice.
Reproduction	15	Reproduction		Volume 157 (2019): Issue 4 (Apr 2019)	Evidence that growth hormone can improve mitochondrial function in oocytes from aged mice	0	1	0	0	0	0	0	Mouse	Female C57BL/6J mice, at 4 (~20 g) and 32 weeks of age (~30 g), were obtained from Beijing HFK Bioscience Co. Inc. Both young (4–5 weeks) and aged (32–33 weeks) mice were assigned randomly to experimental and control groups and treated for 8 weeks.
Reproduction	20	Reproduction		Volume 157 (2019): Issue 5 (May 2019)	C-type natriuretic peptide enhances mouse preantral follicle growth	0	1	0	0	0	0	0	Mouse	All female ICR mice used in this study were from Beijing Vital River Laboratory Animal Technology Co. Ltd. (Beijing, China)
Reproduction	21	Reproduction		Volume 157 (2019): Issue 5 (May 2019)	Transcriptional status of mouse oocytes corresponds with their ability to generate Ca2+ release	0	1	0	0	0	0	0	Mouse	GV oocytes were obtained from 1.5- to 3.5-month-old unprimed F1 (C57Bl6/Tar × CBA/Tar) mice.
Reproduction	23	Reproduction		Volume 157 (2019): Issue 6 (Jun 2019)	Multiple superovulations alter histone modifications in mouse early embryos	0	1	0	0	0	0	0	Mouse	Female CD1 mice were randomly divided into four groups…
Reproduction	30	Reproduction		Volume 158 (2019): Issue 1 (Jul 2019)	Microtubule depolymerization attenuates WNT4/CaMKIIα signaling in mouse uterus and leads to implantation failure	0	1	0	0	0	0	0	Mouse	Adult female virgin BALB/c mice (3 months old, ~26 g) were used in this study.
Reproduction	31	Reproduction		Volume 158 (2019): Issue 1 (Jul 2019)	Tri-ortho-cresyl phosphate induces autophagy of mouse ovarian granulosa cells	0	1	0	0	0	0	0	Mouse	Adult female Kunming (KM) mice (8 weeks old, 20–25 g) were orally administrated at different concentrations of TOCP…
Reproduction	35	Reproduction		Volume 158 (2019): Issue 1 (Jul 2019)	Decidual vascularization during organogenesis after perigestational alcohol ingestion	0	1	0	0	0	0	0	Mouse	Adult female mice were orally exposed to 10% (w/v) ethanol in drinking water for 17 days previous to mating and up to day 10 of gestation.
Reproduction	37	Reproduction		Volume 158 (2019): Issue 2 (Aug 2019)	Tissue-specific knockout of E-cadherin (Cdh1) in developing mouse gonads causes germ cells loss	0	0	1	1	1	0	0	Mouse	Females were killed by spinal dislocation at embryonic days: E10.5, E11.5, E12.5, E13.5, E14.5, E16.5 and E18.5, and the newborns were killed at 1 and 2 dpp (days post partum). The sex of all studied individuals was established by the genotyping using primers to detect Sly (Y chromosome) and Xlr (X chromosome) (McFarlane et al. 2013).
Reproduction	4	Reproduction		Volume 157 (2019): Issue 1 (Jan 2019)	Endometrial mesenchymal stem/stromal cell modulation of T cell proliferation	0	1	0	0	0	0	0	Multiple species	Human endometrium was obtained from six women with regular menstrual cycles undergoing endometrial biopsy or a hysterectomy...Mouse splenocytes were obtained from spleens scavenged from adult C57BL/6J background mice or FoxP3-GFP mice euthanised f
Reproduction	4	Biology of Reproduction		Volume 100, Issue 1, January 2019	Neonatal lactocrine deficiency affects the adult porcine endometrial transcriptome at pregnancy day 13	0	1	0	0	0	0	0	Other	Gilts (Sus scrofa domesticus) were born and raised from a herd of crossbred maternal line (Landrace and Yorkshire genetics) pigs at the U. S. Meat Animal Research Center (USMARC) in Clay Center, Nebraska.	Hampster
Reproduction	5	Biology of Reproduction		Volume 100, Issue 1, January 2019	Do differences in the endometrial transcriptome between uterine horns ipsilateral and contralateral to the corpus luteum influence conceptus growth to day 14 in cattle?	0	1	0	0	0	0	0	Other	Blood samples were taken from the jugular vein for subsequent P4 measurement from all heifers twice daily from day 0 to day 7 after estrus, and once daily thereafter until slaughter	Cat
Reproduction	11	Biology of Reproduction		Volume 100, Issue 1, January 2019	Prostacyclin synthesis and prostacyclin receptor expression in the porcine corpus luteum: evidence for a luteotropic role in vitro	0	1	0	0	0	0	0	Other	Gilts were randomly divided into two experimental groups: cyclic and pregnant. Animals assigned to the cyclic group were slaughtered on days 2–4 (n = 6), 5–7 (n = 4), 10 (n = 6), 12 (n = 6), and 15–16 (n = 5) of their third estrous cycle.	Multiple species
Reproduction	12	Biology of Reproduction		Volume 100, Issue 1, January 2019	PGE2 increases inflammatory damage in Escherichia coli-infected bovine endometrial tissue in vitro via the EP4-PKA signaling pathway	0	1	0	0	0	0	0	Other	Fresh bilateral pro-estrus uterine horns (close to the ovary) from healthy Holstein dairy cows (age: 24 months; weight: ∼600 kg) were obtained from an abattoir local	Other
Reproduction	15	Biology of Reproduction		Volume 100, Issue 1, January 2019	Sexual dimorphism of mitochondrial function in the hypoxic guinea pig placenta	0	0	1	1	1	0	0	Other	A total of 28 pregnant guinea pigs were used to obtain 24 fetuses. Two fetuses of different sexes were selected from a single sow when possible or a single fetus was selected if there was not a matching sibling of the opposite sex.
Reproduction	17	Biology of Reproduction		Volume 100, Issue 1, January 2019	Associations between fetal size, sex and placental angiogenesis in the pig	0	0	1	1	1	0	0	Other	At GD45, 60, and 90, fetal sex was determined morphologically.
Reproduction	26	Biology of Reproduction		Volume 100, Issue 2, February 2019	The inhibitory effect of melatonin on mammary function of lactating dairy goats	0	1	0	0	0	0	0	Other	The third parity healthy female Guanzhong Saanen dairy goats were used in the study.
Reproduction	31	Biology of Reproduction		Volume 100, Issue 3, March 2019	Exposure of pregnant sows to low doses of estradiol-17β impacts on the transcriptome of the endometrium and the female preimplantation embryos	0	0	1	1	1	0	0	Other	Male castrated piglets (approximately 20 weeks old) were used as most sensitive model because of lowest concentrations of endogenous E2….This is the second part of a long-term large animal trial. In the first part, the sows had been exposed to E2 over the entire length of gestation
Reproduction	33	Biology of Reproduction		Volume 100, Issue 3, March 2019	Seminal plasma modulates expression of endometrial inflammatory meditators in the bovine	0	1	0	0	0	0	0	Other	A total of 54 multiparous nonlactating Angus beef cows were randomly assigned to receive 1 ml of treatment:
Reproduction	34	Biology of Reproduction		Volume 100, Issue 3, March 2019	Biochemical characterization of progesterone-induced alterations in bovine uterine fluid amino acid and carbohydrate composition during the conceptus elongation window	0	1	0	0	0	0	0	Other	The estrous cycles of 35 Charolais-Limousin heifers with a mean age (±SD) of 24.9 ± 5.6 months and weight…
Reproduction	1	Reproduction		Volume 157 (2019): Issue 1 (Jan 2019)	Effects of androgen and oestrogen on IGF pathways controlling phallus growth	0	0	1	1	1	0	0	Other	Tammar wallabies (Macropus eugenii) of Kangaroo Island (South Australia) origin were held in our breeding colony. The sex of the pouch young was identified by the presence of scrotal budges (male) or mammary primordia (female)
Reproduction	3	Reproduction		Volume 157 (2019): Issue 1 (Jan 2019)	Sertoli–immature spermatids disengagement during testis regression in the armadillo	1	0	0	0	0	0	0	Other	Armadillos were caught in the area of Loma Verde (35°16′S; 58°23′W; http://g.co/maps/sswm, Province of Buenos Aires, Argentina)...From each trapped male, the left testis was withdrawn under anaesthesia
Reproduction	5	Reproduction		Volume 157 (2019): Issue 1 (Jan 2019)	Effects of intravenous infusion of E. coli lipopolysaccharide in early pregnant cows	0	1	0	0	0	0	0	Other	Eight non-lactating German Holstein cows, clinically healthy and 35 ± 3 days (mean ± s.e.m.) after insemination, were used for the LPS trial. These cows were 3.7 ± 0.8 years old.
Reproduction	6	Reproduction		Volume 157 (2019): Issue 1 (Jan 2019)	Modification of sperm fatty acid composition during epididymal maturation in bats	1	0	0	0	0	0	0	Other	Bats were collected from a captive population, having free access to a tropical dome mimicking a Belizean dry forest (Papiliorama, Kerzers, Switzerland). Thirty C. perspicillata males were individually marked (PIT tags) and housed in five cages (dimensions: 1 × 2 × 2 m), with six individuals per cage.
Reproduction	14	Reproduction		Volume 157 (2019): Issue 4 (Apr 2019)	Association of foetal size and sex with porcine foeto-maternal interface integrin expression	0	0	1	1	1	0	0	Other	Large White × Landrace gilts (age 11–14 months; n = 31) were observed daily for signs of oestrus and were housed in groups of 6–8 animals per pen….At GD45, 60 and 90, foetal sex was determined morphologically.
Reproduction	17	Reproduction		Volume 157 (2019): Issue 4 (Apr 2019)	Progesterone alters the bovine uterine fluid lipidome during the period of elongation	0	1	0	0	0	0	0	Other	he oestrous cycles of 35 Charolais and Limousin crossbred heifers with a mean age (± s.d.) of 24.9 ± 5.6 months and weight (± s.d.) of 601.6 ± 47.7 kg were synchronized with an injection of gonadotropin-releasing hormone (GnRH)
Reproduction	18	Reproduction		Volume 157 (2019): Issue 5 (May 2019)	Serum and tissue pregnanes and pregnenes after dexamethasone treatment of cows in late gestation	0	1	0	0	0	0	0	Other	Cows were synchronized as previously described (Larson et al. 2006) and pregnancies established (day 0) by artificial insemination with frozen semen from a single sire.
Reproduction	22	Reproduction		Volume 157 (2019): Issue 6 (Jun 2019)	HASPIN kinase mediates histone deacetylation to regulate oocyte meiotic maturation in pigs	0	1	0	0	0	0	0	Other	Ovaries were collected from a local slaughterhouse and transported to the laboratory at 28–35°C in physiological saline solution.
Reproduction	26	Reproduction		Volume 157 (2019): Issue 6 (Jun 2019)	Transcriptome analyses of ovarian stroma: tunica albuginea, interstitium and theca interna	0	1	0	0	0	0	0	Other	Bovine ovaries (one per animal) were collected at a local abattoir
Reproduction	27	Reproduction		Volume 158 (2019): Issue 1 (Jul 2019)	Uterine fluid proteome changes during diapause and resumption of embryo development in roe deer (Capreolus capreolus)	0	1	0	0	0	0	0	Other	The reproductive tract of 225 female roe deer was obtained during regular huntings from September 2015 to January 2016 and September 2016 to January 2017.
Reproduction	29	Reproduction		Volume 158 (2019): Issue 1 (Jul 2019)	Persistent effects on bovine granulosa cell transcriptome after resolution of uterine disease	0	1	0	0	0	0	0	Other	The design was a prospective cohort study conducted from June 2016 to February 2017 at the University of Florida Dairy Unit using a group of 45 lactating Holstein Bos taurus taurus dairy cows
Reproduction	32	Reproduction		Volume 158 (2019): Issue 1 (Jul 2019)	Effects of a n-3 polyunsaturated fatty acid-enriched diet on embryo production in dairy cows	0	1	0	0	0	0	0	Other	Holstein primiparous cows (n = 37) were managed in loose housing during lactation.
Reproduction	33	Reproduction		Volume 158 (2019): Issue 1 (Jul 2019)	Gene expression and metabolic response of bovine oviduct epithelial cells to the early embryo	0	1	0	0	0	0	0	Other	Bovine oviducts at the early luteal phase (corresponding to days 3–5 of the estrous cycle) were obtained from slaughtered heifers and selected based on ovarian morphology
Reproduction	36	Reproduction		Volume 158 (2019): Issue 2 (Aug 2019)	Vaspin in the pig ovarian follicles: expression and regulation by different hormones	0	1	0	0	0	0	0	Other	Porcine ovarian follicles, WAT around the kidney and plasma were collected from MS and LW sexually mature pigs at a local abattoir
Reproduction	1	Biology of Reproduction		Volume 100, Issue 1, January 2019	Reduction of Kiss1 expression in the anteroventral periventricular nucleus is associated with atrazine-induced attenuation of the luteinizing hormone surge in female rats	0	1	0	0	0	0	0	Rat	Female Jcl:Wistar rats were purchased from CLEA Japan, Inc. (Tokyo, Japan) and were group-housed in cages and maintained on a 12-h light, 12-h dark cycle with lights on at 7:00. All had free access to solid food (CR-LPF, Oriental Yeast Co., Ltd,	Rat
Reproduction	7	Biology of Reproduction		Volume 100, Issue 1, January 2019	Sleep restriction during peripuberty unbalances sexual hormones and testicular cytokines in rats	1	0	0	0	0	0	0	Rat	Peripubertal 30-day-old (PND 30) male Wistar rats weighing approximately 125 g were supplied by the Animal Facilities House	Sheep
Reproduction	8	Biology of Reproduction		Volume 100, Issue 1, January 2019	Effects of prostaglandin E2 on gap junction protein alpha 1 in the rat epididymis	1	0	0	0	0	0	0	Rat	Lactating Sprague-Dawley female rats with litters of males or post-weaned rats of specific ages (PND 28, 42, and 91) were purchased from Charles-River Laboratories	Non-human primate
Reproduction	9	Biology of Reproduction		Volume 100, Issue 1, January 2019	A mathematical model for predicting putative association between E2/T ratio and the development of benign prostate hyperplasia in rats	1	0	0	0	0	0	0	Rat	A total of 176 male Sprague-Dawley rats (120 ± 10 g, 4–5 weeks of age) (BK Laboratory Animal Limited Company, Shanghai, China) of SPF grade were selected and housed in groups of 18 under the same conditions	Other
Reproduction	10	Biology of Reproduction		Volume 100, Issue 1, January 2019	Testosterone plays a permissive role in angiotensin II-induced hypertension and cardiac hypertrophy in male rats	1	0	0	0	0	0	0	Rat	Since male rats reach sexually maturity and have stable testosterone levels after 6–7 weeks of age, we used 8-week-old post pubertal rats for this study.	Rat and Mouse
Reproduction	14	Biology of Reproduction		Volume 100, Issue 1, January 2019	Prenatal two-hit stress affects maternal and offspring pregnancy outcomes and uterine gene expression in rats: match or mismatch?	0	0	1	1	1	0	0	Rat	Three hundred and sixty-six Long-Evans hooded rats (Rattus Norvegicus) were used. Nulliparous females between the age of 110 and 155 days, bred and raised at the vivarium of the University of Lethbridge, AB, Canada, were mated with stress-naïve males (n = 10). Offspring gender was determined on P1 (n = 318), and pup weights were measured on P1, P7, P14, P21 (weaning), and P30. Male and female pro…
Reproduction	19	Biology of Reproduction		Volume 100, Issue 1, January 2019	Electroacupuncture facilitates implantation by enhancing endometrial angiogenesis in a rat model of ovarian hyperstimulation	0	1	0	0	0	0	0	Rat	A total of 260 SPF mature, virginal Wistar female rats aged 10–12 weeks and 30 SPF male Wistar rats aged 10–12 weeks were provided by the Center for Disease Control and Prevention of Hubei Province
Reproduction	21	Biology of Reproduction		Volume 100, Issue 1, January 2019	Cadmium induces ovarian granulosa cell damage by activating PERK-eIF2α-ATF4 through endoplasmic reticulum stress	0	1	0	0	0	0	0	Rat	Ovaries were removed from the rats (n = 12) using a sterile technique, washed with saline…
Reproduction	37	Biology of Reproduction		Volume 100, Issue 3, March 2019	Estrogen imprinting compromises male sexual behavior and affects the number of androgen-receptor-expressing hypothalamic neurons	0	0	1	1	0	0	0	Rat	Twenty virgin female rats were mated overnight, and pregnancy was confirmed by the identification of spermatozoa in vaginal smears the following morning, which was considered day 1 of gestation. Ten male Wistar rats in six litters (adjusted for a six-animal litter size) received 120 μg of 17β-estradiol (E2; 1,3,4[10]-estratriene-3, 17β-diol) in 25 μL of corn oil...
Reproduction	40	Biology of Reproduction		Volume 100, Issue 3, March 2019	Acute effects of the translocator protein drug ligand FGIN-1-27 on serum testosterone and luteinizing hormone levels in male Sprague-Dawley rats	1	0	0	0	0	0	0	Rat	Adult male Sprague-Dawley rats of 90 days of age were purchased from Shanghai Animal Centre…
Reproduction	19	Reproduction		Volume 157 (2019): Issue 5 (May 2019)	Gastrointestinal capacity, gut hormones and appetite change during rat pregnancy and lactation	0	1	0	0	0	0	0	Rat	Female Wistar rats (Harlan, Bicester, UK; n = 49) were housed in groups of three or four, with free access to standard rodent breeding diet (801730, Special Diets Service Essex, UK), water and bedding material.
Reproduction	2	Reproduction		Volume 157 (2019): Issue 1 (Jan 2019)	Gestational nutrition 2: gene expression in sheep fetal ovaries exposed to gestational under nutrition	0	1	0	0	0	0	0	Sheep	From the day of mating, ewes were housed indoors with 39 ewes fed a maintenance diet...At day 55 of gestation, ewes were then fed ad libitum pasture. A subgroup of these ewes (n = 23) were assigned for fetal collections.
Reproduction	10	Reproduction		Volume 157 (2019): Issue 3 (Mar 2019)	Gestational nutrition 1: alterations to gestational nutrition can increase indicators of fertility in sheep	0	1	0	0	0	0	0	Sheep	Five-year-old Romney × Coopworth ewes (n = 100) with a history of either single or twin lambing and a narrow weight range (65–72 kg) were selected for this study
Reproduction	11	Reproduction		Volume 157 (2019): Issue 3 (Mar 2019)	Cervical mucus sialic acid content determines the ability of frozen-thawed ram sperm to migrate through the cervix Cervical mucus sialic acid content determines the ability of frozen-thawed ram sperm to migrate through the cervix Cervical mucus sialic acid content determines the ability of frozen-thawed ram sperm to migrate through the cervix Cervical mucus sialic acid content determines the abil…	0	1	0	0	0	0	0	Sheep	characterize the number and location of spermatozoa within the cervix and (ii) quantify sialic acid and fucose within the cervical lumen and channels in Suffolk and Belclare ewes. Oestrus was synchronized in 18 Belclare and 14 Suffolk multiparous ewes…
					Total:	15	54	11	11	9	0	0
Table Analyzed	Reproduction Both Sexes				Table Analyzed	Reproduction Analyses
P value and statistical significance					P value and statistical significance
Test	Chi-square				Test	Chi-square
Chi-square, df	0.8820, 1				Chi-square, df	3.701, 1
z	0.9391				z	1.924
P value	0.3477				P value	0.0544
P value summary	ns				P value summary	ns
One- or two-sided	Two-sided				One- or two-sided	Two-sided
Statistically significant (P < 0.05)?	No				Statistically significant (P < 0.05)?	No
Data analyzed	Both Sexes	Did Not Analyze by Sex	Total		Data analyzed	Analyzed By Sex	Did Not Analyze by Sex	Total
2009	19	81	100		2009	19	0	19
2019	11	69	80		2019	9	2	11
Total	30	150	180		Total	28	2	30
Percentage of row total	Both Sexes	Did Not Analyze by Sex			Percentage of row total	Analyzed By Sex	Did Not Analyze by Sex
2009	19.00%	81.00%			2009	100.00%	0.00%
2019	13.75%	86.25%			2019	81.82%	18.18%
Percentage of column total	Both Sexes	Did Not Analyze by Sex			Percentage of column total	Analyzed By Sex	Did Not Analyze by Sex
2009	63.33%	54.00%			2009	67.86%	0.00%
2019	36.67%	46.00%			2019	32.14%	100.00%

[truncated: 2 more sheets: Behavior , Statistics ]
